# Supplementary material for: Identification and functional analysis of mitogen-activated protein kinase kinase kinase (MAPKKK) genes in canola (Brassica napus L.)
Source: PubMed Central journal article supplement (PMC3991747; doi:10.1093/jxb/eru092), 2014-03-06
Supplement: supp_eru092_jexbot111013_file001.pdf [file supp_eru092_jexbot111013_file001.pdf]

Identification and functional analysis of mitogen-activated protein kinase kinase kinase (MAPKKK) genes in canola (*Brassica napus* L.)

Yun Sun, Chen Wang, Bo Yang, Feifei Wu, Xueyu Hao, Wanwan Liang, Fangfang Niu, Jingli Yan, Hanfeng Zhang, Boya Wang, Michael K Deyholos, Yuan-Qing Jiang

Table S1. BnaMAPKKK EST summary.

| Gene                                      | GenBank accession numbers of ESTs                                                                                                                                                                                                                                                                                                                            | No.of contigs | No.of singletons | total No.of ESTs |
|-------------------------------------------|--------------------------------------------------------------------------------------------------------------------------------------------------------------------------------------------------------------------------------------------------------------------------------------------------------------------------------------------------------------|---------------|------------------|------------------|
| <i>BnaMAPKKK1</i>                         | DY022877, EV008430, GR446403, EV149603, EV149926, EV149087, EV149217                                                                                                                                                                                                                                                                                         | 2             | 1                | 7                |
| <i>BnaMAPKKK2</i>                         | CX192261                                                                                                                                                                                                                                                                                                                                                     | 0             | 1                | 1                |
| <i>BnaMAPKKK3</i><br>( <i>BnMAP3Ka1</i> ) | CX191632, EV172297, GT082081, EE542547, EE550677                                                                                                                                                                                                                                                                                                             | 2             | 0                | 5                |
| <i>BnaMAPKKK4</i>                         | EV072989, EE444225, ES910539, CX187618, ES919039                                                                                                                                                                                                                                                                                                             | 2             | 1                | 5                |
| <i>BnaMAPKKK5</i>                         | GT078796, GT078644, EV217621, EV158579                                                                                                                                                                                                                                                                                                                       | 2             | 0                | 4                |
| <i>BnaMAPKKK6</i><br>( <i>BnMAP3Kε1</i> ) | EV145804, EV054446, EV055798                                                                                                                                                                                                                                                                                                                                 | 1             | 1                | 3                |
| <i>BnaMAPKKK7</i>                         | CD818725, EE403405, DY002368, EL629803, EE457278, ES979963, ES966150, EV042545, EV018421, EV078443, EL626620, EL627580                                                                                                                                                                                                                                       | 2             | 3                | 12               |
| <i>BnaMAPKKK8</i><br>( <i>BnMAP3Kβ1</i> ) | EV192042, EV035080, FG566093, EV055951, CJ999505, EV023028                                                                                                                                                                                                                                                                                                   | 2             | 1                | 6                |
| <i>BnaMAPKKK9/M</i><br><i>EKK2</i>        | EV161695, EV161322, EV161456, EV161613, EV161538                                                                                                                                                                                                                                                                                                             | 2             | 0                | 5                |
| <i>BnaMAPKKK11</i>                        | EE429793, DY000072, ES266880, EV117746, FG553806, EL591134                                                                                                                                                                                                                                                                                                   | 1             | 3                | 6                |
| <i>BnaMAPKKK12</i>                        | EE452764, EV008430, GR446403                                                                                                                                                                                                                                                                                                                                 | 1             | 1                | 3                |
| <i>BnaMAPKKK13</i>                        | ES909856, ES913159, FG564143, FG557695                                                                                                                                                                                                                                                                                                                       | 1             | 0                | 4                |
| <i>BnaMAPKKK14</i>                        | EE477468, GR443470, CN728075, EV076377, EV078743, CX194918, EE461225, GR439026                                                                                                                                                                                                                                                                               | 2             | 1                | 8                |
| <i>BnaMAPKKK15</i>                        | EV111390, EV111105                                                                                                                                                                                                                                                                                                                                           | 1             | 0                | 2                |
| <i>BnaMAPKKK17</i>                        | DK466745, DK524925                                                                                                                                                                                                                                                                                                                                           | 1             | 0                | 2                |
| <i>BnaMAPKKK18</i>                        | GR719871, GR727308                                                                                                                                                                                                                                                                                                                                           | 1             | 0                | 2                |
| <i>BnaMAPKKK19</i>                        | CX279903                                                                                                                                                                                                                                                                                                                                                     | 0             | 1                | 1                |
| <i>BnaMAPKKK20</i>                        | EE444892, EE417560, GR436387                                                                                                                                                                                                                                                                                                                                 | 1             | 0                | 3                |
| <i>BnaZIK1</i>                            | CD828824, EV027260, EV136051, ES905716, EV028082, EE432777, FG561292, EV190872, EV195091, CD836798, GT084453, GR462753, EE444646, EV134286, EV133959, EV006837, EE471093, ES905420, ES989300, EV184525, EV183080, CD835586, CD835289, GR463177, CD832636                                                                                                     | 6             | 0                | 25               |
| <i>BnaZIK2</i>                            | ES911192, EV052919, EE565337, EV222224, EV221813, EV142598, EV142928, ES905716, EV028082, ES913429, EE465196                                                                                                                                                                                                                                                 | 2             | 2                | 11               |
| <i>BnaZIK3</i>                            | EE472372                                                                                                                                                                                                                                                                                                                                                     | 0             | 1                | 1                |
| <i>BnaZIK4</i>                            | EV073626, EV139126, EV138473, EV138658, EV197022, EV150739, EV150892, EV070186, EE492290, EE490805, EE490822, EE494296, EE496988, EE496899, EE496635, EE492085, EE495787, EE492932, EE495844, EE491945, EE491291, EE497772, EE496649, EE493567, EV100529, EE432777, FG561292, EV190872, EV197102, EL625512, EV100585, EV190796, EE563876, CX278066, CX189467 | 4             | 3                | 35               |
| <i>BnaZIK5</i>                            | EE536542, GR458826, EV195091, CD836798, GT084453, GR462753, EE444646, EV134286, EV133959, EV006837, EE471093, CD835586, CD835289, GR463177, CD832636, EV163147, EV195009, EV162973, EV194388, EV194455, CN728521, EV216646, EV061853, EV137850, EV138327, EV138063                                                                                           | 4             | 2                | 26               |

|                       |                                                                                                                                                                                                                                                                                                                                                      |   |   |    |
|-----------------------|------------------------------------------------------------------------------------------------------------------------------------------------------------------------------------------------------------------------------------------------------------------------------------------------------------------------------------------------------|---|---|----|
| <i>BnaZIK6</i>        | FG568049,ES980749,GR455306,ES983869,<br>DY020517,EE411206,EV217230,EE419889,EV125474,E<br>V181844,EV181764,GR457279,EV103908,EV104150,E<br>V204069,EE566985, EV125550                                                                                                                                                                                | 2 | 1 | 17 |
| <i>BnaZIK7</i>        | EE536542                                                                                                                                                                                                                                                                                                                                             | 0 | 1 | 1  |
| <i>BnaZIK8</i>        | GT085120,GT084787,EL591342,EV032757,EV104353,E<br>V104948,EV104623,EV104261,EV068090,EG020399,C<br>N726130,EV163028, EV163329,ES922711,EV049769                                                                                                                                                                                                      | 3 | 1 | 15 |
| <i>BnaZIK9</i>        | EV184439,EV182994, ES905420, ES989300,EV184525,<br>EV183080, EV197102 EV052012                                                                                                                                                                                                                                                                       | 2 | 2 | 8  |
| <i>BnaCTR1</i>        | ES989676,EE561092,ES909336,EV086661,ES980529,ES<br>916126,ES981393,ES908728,EV118427,EV122652,EV13<br>2908,FG576903,ES913258,CX196077,EL629678,ES9526<br>63,EL586905,CJ999426,ES992664,EV192459,EE562099,<br>CX188622,ES953149,ES964092,EV011520,EV026142,E<br>V039146,EE421469,EV122573,EV132704                                                    | 3 | 0 | 30 |
| <i>BnaEDR1 (Raf2)</i> | EE557579                                                                                                                                                                                                                                                                                                                                             | 0 | 0 | 1  |
| <i>BnaRaf3</i>        | FG553342,EE492012,EE497602,EE494763,EE497280,EE<br>490955,EE493282,EE497282,EE495237,EE496270,EE49<br>7166,EE491978,EE493180,EE492484,EE493124,EE4957<br>19,EE494086,EE497526,EE492074,EE493713,EE495879,<br>EE491260,EE498010,EE497752,EE493692,EE491100,ES<br>974247,EV117365,EV117280,EE473862,EE564679,<br>ES957467,EV013879 ,EV058376 ,EL589581 | 3 | 0 | 35 |
| <i>BnaRaf4</i>        | EV175536 ,EV175611                                                                                                                                                                                                                                                                                                                                   | 1 | 0 | 2  |
| <i>BnaRaf6</i>        | EV205676 ,<br>EV205897 ,EV112696,EV065524 ,ES905061 ,EV114878,<br>EV112785                                                                                                                                                                                                                                                                           | 3 | 0 | 7  |
| <i>BnaRaf7</i>        | GT077030                                                                                                                                                                                                                                                                                                                                             | 0 | 1 | 1  |
| <i>BnaRaf9</i>        | GR441138,CX193045, EV216923                                                                                                                                                                                                                                                                                                                          | 1 | 1 | 3  |
| <i>BnaRaf11</i>       | ES900067,GR440297,EV181221,EV181137,ES898401,E<br>E415962,ES898940,EE437643,CX281039,EE415166,EE4<br>11762,DY005002,ES912117,FG560755,EV198857,CX18<br>9012,GR441948,GR441859,EV217100,EV192425                                                                                                                                                      | 3 | 3 | 20 |
| <i>BnaRaf13</i>       | CX192251,EE435654,EV202317,EE435564,EV122200,E<br>V122282,EV198765,ES908916,EV198840                                                                                                                                                                                                                                                                 | 3 | 1 | 9  |
| <i>BnaRaf12</i>       | CX280761,CD836474 ,CD836011,EV152662, EE549634,<br>EE568144                                                                                                                                                                                                                                                                                          | 2 | 2 | 6  |
| <i>BnaRaf15</i>       | EV042506,ES967579                                                                                                                                                                                                                                                                                                                                    | 0 | 2 | 2  |
| <i>BnaRaf16</i>       | ES271921, ES271656, GR459694, ES271811,GR454502 ,<br>GR456294 ,GR458356, EV012120                                                                                                                                                                                                                                                                    | 3 | 1 | 8  |
| <i>BnaRaf17</i>       | EV193963,EV143899,EL629490,EV198792, EV204737,<br>EE444321, ES909131, EV198869, EV008880, CX188807,<br>EV143538, ES901419, EV193903, EV071758, EE513821,<br>EV194231, EE410295                                                                                                                                                                       | 3 | 3 | 17 |
| <i>BnaRaf18</i>       | EV168971, G566845,CN726119,EV145114,EV145484,<br>EE470702, EE555040, DY010700,EV181902,EE433611,<br>EV181814, EV182318 , EV121398 , EV121321                                                                                                                                                                                                         | 3 | 1 | 14 |
| <i>BnaRaf20</i>       | EV148544 , EE445303 ,EE558140 , EV148393, EV211763                                                                                                                                                                                                                                                                                                   | 2 | 1 | 5  |

|                 |                                                                                                                                                                                                                                                                                                                                                                                                                                                                                                                                                                                                                                                                                                                                                                  |   |   |    |
|-----------------|------------------------------------------------------------------------------------------------------------------------------------------------------------------------------------------------------------------------------------------------------------------------------------------------------------------------------------------------------------------------------------------------------------------------------------------------------------------------------------------------------------------------------------------------------------------------------------------------------------------------------------------------------------------------------------------------------------------------------------------------------------------|---|---|----|
| <i>BnaRaf21</i> | CX188760,EE392444,EV045763,EV131126,EV159014,G<br>R442116,ES903985,ES912963,EE549185,CD828271,EV<br>198342,GR441411,EV216575,EV200708, EV057267,<br>EV161604, EV161528, EV121092, EV191002,FG562361,<br>EV081150,EV168660, EV121003,EV190923, EV161401,<br>EV161312,EV161685, EE455467,EV010619,EV168718,<br>EV110458,EV110382, EV202815, EV110158,<br>EV200634,EV110207, EE459573, EV222182,<br>EV189732,EV175173, DY001106,EV182843,<br>EE478620,GR450566,ES903484,EV176650,EV176575,<br>EV131046, EV020832,EL622888, ES900851                                                                                                                                                                                                                                 | 9 | 6 | 51 |
| <i>BnaRaf22</i> | CD828801,DY012414,FG555341,EE411079,EV053578,E<br>E541889,EV038508,EV078680,EV176349,EV176422,ES<br>989778,EV117988, EL623219,ES991338,EV120911,<br>GR447086,EE434452,GR441880,FG567395,EV036952,D<br>Y001930,EV120893,EV088066,EV214281,EV214617,EV<br>141062,ES966119, EV013186,EE536863, EL625655,<br>EV059455, CD842174, EV186139,EV041195, ES909882,<br>EE449173, EV123588, GT073523,CD833520,CD832597,<br>CD835829,EV023686,CN826331,EV185811,EE405899,E<br>S989158,EV062246,EV084408,EE568957,EE568610,EE4<br>70507,EV050318,ES990445,FG561994,FG556992,EV079<br>399,EV076551,FG574371,FG554400,EE468789,FG55331<br>8,DY002182,EV142833                                                                                                                   | 7 | 3 | 63 |
| <i>BnaRaf23</i> | CB686056,EE483168,EV080799,EV171789,AY587554,A<br>Y587554,ES994863,CN827635,CN827634,EV171782,EV<br>171787, ES907355,EE445038,ES908335,EV063584,<br>CN728271,GR455301,ES985384, GR456681, ES900514,<br>EV107604,EV107986,EV009491,EE552793                                                                                                                                                                                                                                                                                                                                                                                                                                                                                                                       | 5 | 4 | 24 |
| <i>BnaRaf24</i> | GR440156,GT084680,EV023244,EE463020,EV038513,E<br>V177532,EV223456,EE489551,EV223237,EV168802,CX<br>188972,CX196226,FG575581,EV020291,ES963392,ES97<br>3776,ES973772,EV130809,EV021734,EL628173,EV2245<br>24,EV224626,EV224194,EV224283,EE506566,EV14515<br>7,EV145499,EV207344,CD837080                                                                                                                                                                                                                                                                                                                                                                                                                                                                         | 3 | 1 | 29 |
| <i>BnaRaf26</i> | ES989096,EV155356,GR454201,DY021755,GR453562,C<br>X195388,CX195380,EV109439,EV155273                                                                                                                                                                                                                                                                                                                                                                                                                                                                                                                                                                                                                                                                             | 1 | 0 | 9  |
| <i>BnaRaf27</i> | EV189564,GT085380,H74387,GT085282,GT084914,GT0<br>84955, EE484013,EV189638,EV165926,EV221771,<br>EE440826,H74653 ,H74454,H74614,H74390,EV165995,<br>H74431                                                                                                                                                                                                                                                                                                                                                                                                                                                                                                                                                                                                       | 2 | 3 | 16 |
| <i>BnaRaf28</i> | CD842174,EV186139,EV041195,ES909882,EE449173,E<br>V123588,GT073523,CD833520,CD832597,CD835829,E<br>V023686,CN826331,EV185811,EE405899,EE537024,EL<br>626484,EE458599,CD836673,CN830316,CN830315,ES9<br>04982,EV132004,EV132281,ES907483,EV190689,CB68<br>6365,FG576634,EV109612,CN730941,EV131716,EE404<br>614,EV123510,EV190606,EV109226,FG571495,EV0349<br>38,GR442269, EL623219, ES991338, EV120911,<br>GR447086, EE434452, GR441880, FG567395,<br>EV036952, DY001930, EV120893, EV088066,EV214281,<br>EV214617,EV141062,ES966119,FG567592, DW998470,<br>FG572537, CD831261, CD835589, CD831446,<br>FG568749, ES989158, EV062246,EV084408, EE568957,<br>EE568610, CD832942, ES990066, EV003278, EE538539,<br>EV002846, EV033982, EV012823, EV012866, CD836853 | 8 | 2 | 73 |
| <i>BnaRaf29</i> | EV057267,EV161604,EV161528,EV121092,EV191002,F<br>G562361,EV081150,EV168660,EV121003,EV190923,EV<br>161401,EV161312,EV161685,EE455467,EV010619,EV1<br>68718                                                                                                                                                                                                                                                                                                                                                                                                                                                                                                                                                                                                      | 1 | 0 | 16 |

|                 |                                                                                                                                                                                                                                                                                                                                  |   |   |    |
|-----------------|----------------------------------------------------------------------------------------------------------------------------------------------------------------------------------------------------------------------------------------------------------------------------------------------------------------------------------|---|---|----|
| <i>BnaRaf30</i> | GR450566,ES903484,EV176650,EV176575,<br>DY001106,EV182843,EE478620,ES903985,ES912963,E<br>E549185,EV222182,EV189732,EV175173,ES959642,EV<br>011656,ES907290,CD828107,ES906772,EV189809,EV18<br>2928,EE454914,EE419315                                                                                                            | 6 | 2 | 22 |
| <i>BnaRaf31</i> | EE562897 , EE562760                                                                                                                                                                                                                                                                                                              | 1 | 0 | 2  |
| <i>BnaRaf32</i> | EV148003,EV014780,EV147698,ES900634,ES900648                                                                                                                                                                                                                                                                                     | 1 | 0 | 5  |
| <i>BnaRaf33</i> | CD837014,CX278481,DY025237,EV022140,CX280005,<br>EE444749,EE419158,GR439687,EE457604                                                                                                                                                                                                                                             | 3 | 0 | 9  |
| <i>BnaRaf34</i> | EE562760,EE562897                                                                                                                                                                                                                                                                                                                | 1 | 0 | 2  |
| <i>BnaRaf35</i> | EV207803,EV207443,CX188942,EL588144,GR438570,E<br>L630251,EE494265,EE496543,EE495641, FG557003                                                                                                                                                                                                                                   | 1 | 1 | 10 |
| <i>BnaRaf36</i> | GR454194, EV126104                                                                                                                                                                                                                                                                                                               | 0 | 2 | 2  |
| <i>BnaRaf37</i> | EE449283, EE450402, EV022618, EV070828, GR44340                                                                                                                                                                                                                                                                                  | 0 | 5 | 5  |
| <i>BnaRaf38</i> | CD837014,CX278481,DY025237                                                                                                                                                                                                                                                                                                       | 1 | 0 | 3  |
| <i>BnaRaf39</i> | ES902728,ES271574,EV131406,EV206069,EE467568,G<br>R459322,EV036406,GR462543,GR457156,FG554126,G<br>R462574,EV002033,EV131215,EV205655,ES982394,EE<br>435970,EV014667,GR453462,GR439048,GR459363,EV2<br>22031,EV222394, EE554782,GR453503,<br>GR453297,ES965014,FG568031,EV031135,EE567796                                        | 4 | 3 | 29 |
| <i>BnaRaf41</i> | EL623529,EE553522,CN831212,EE469147,EV109838,C<br>N727032                                                                                                                                                                                                                                                                        | 1 | 1 | 6  |
| <i>BnaRaf42</i> | FG566845,CN726119,EV145114,EV145484,EE470702,E<br>E555040,GR440156,GT084680,EV023244,EE463020,EV<br>038513,EV177532,EV223456,EE489551,EV223237,EV1<br>68802,CX188972,CX196226,FG575581,EV020291,ES96<br>3392,ES973776,ES973772,EV130809,EV207803,EV2074<br>43,CX188942,EL588144,GR438570,EL630251,EE49426<br>5,EE496543,EE495641 | 3 | 0 | 33 |
| <i>BnaRaf43</i> | EE423013,EV013275,EE438214,EL623537,GR457543,E<br>V123924,GR456382,EE477516,EE418279,EE566532,EE<br>569368,EE538516,GR443324,EV048864,EL591064,EE41<br>4233                                                                                                                                                                      | 3 | 1 | 16 |
| <i>BnaRaf46</i> | CN728271, GR455301,ES985384,GR456681, EV163620,<br>EV080799                                                                                                                                                                                                                                                                      | 1 | 2 | 6  |
| <i>BnaRaf47</i> | EV009491, EE552793                                                                                                                                                                                                                                                                                                               | 1 | 0 | 2  |
| <i>BnaRaf48</i> | ES910727,ES902967,EL628100,ES905974,EV219602,EV<br>219362,EV134513,EV110252,EV110524,EV120338,ES9<br>25881,ES910160,ES907733,FG566519,EV120257,EV142<br>866,GT084966,GT085401,EE538279,EV087758,EV1425<br>03,ES913826,EV116485,EV168494,EV168531,EV11656<br>5,CD831398,ES910727                                                  | 5 | 1 | 28 |

These EST were identified using the cDNA sequences of 80 Arabidopsis MAPKKK genes as the queries against the *Brassica napus* (Bna) EST database in NCBI

([www.ncbi.nlm.nih.gov/dbEST/index.html](http://www.ncbi.nlm.nih.gov/dbEST/index.html)) with a cut-off E value of  $10^{-4}$ . The ESTs were clustered into contigs or singlets using a criteria of more than 95% similarity over a range of 50 bp or more. The GenBank accession numbers of each EST were listed after each individual BnaMAPKKK genes.

Table S2. Primers used in this study.

| <b>Gene</b>        | <b>primer sequence (5'→3')</b>                                                                                                                                                                                                                                                                                                                                                                                                                                                                                                                                                                       |
|--------------------|------------------------------------------------------------------------------------------------------------------------------------------------------------------------------------------------------------------------------------------------------------------------------------------------------------------------------------------------------------------------------------------------------------------------------------------------------------------------------------------------------------------------------------------------------------------------------------------------------|
| <i>BnaMAPKKK17</i> | Q-F:GACGGCGACGCAACTCCTAAAC<br>Q-R:GACCCATCCAACCCACCAACAC<br>F:cgccATGGAATGGACTAGAGGAAGAATCC<br>R:egggatccTCAATTTACAGTCCCCCCCAC<br>BiFC-F:cgGGGCCCGAATGGACTAGAGGAAGAATCCTAGG<br>BiFC-R:egggatccTCAATTTACAGTCCCCCCCAC                                                                                                                                                                                                                                                                                                                                                                                  |
| <i>BnaMAPKKK18</i> | Q-F:AGACGCCTGAGCTGCCTTC<br>Q-R:TTAATAATTGCCTCGCTGTCCATCT<br>BiFC-F: <u>ggactagt</u> AATTGGACTAGAGAAAAACAATAGGCC<br>BiFC-R :cgcgtcgacATCATTATTCCGTCGAACCGTGATC<br>OE-F:cgccATGGACAATTGGACTAGAGAAAAACAATAGGCC<br>OE-R:<br>gcTCTAGAgAGCGTAATCTGGAACATCGTATGGGTAAGCGTAATCTGGAACATCGT<br>ATGGGTATCCACCTCCGGGCGCGCCGTCGACGGGCCCATCATTATTCCGTCGAAC<br>CGTG<br>BnaM3K18-K32R-F:ACC ATC GCC GTG GGA TCC GCC GAG<br>BnaM3K18-K32R-R:GTG AAA CTC GGC GGA TCC CAC GGC GAT<br>BnM3K18-GW-NcoI-F:AAAGCAGGCTTCcATGggtAATTGGACTAGAGAAAAACA<br>BnM3K18-GW-Sall-R:GTCTCCACCTCCGGAg <b>gtcgac</b> ATCATTATTCCGTCGAACCGT |
| <i>BnaMAPKKK19</i> | Q-F:GAGGCGCCGGAGGAGAG<br>Q-R:CCGTACGGTGACCCAGTTA<br>BiFC-F:ggACTAGTGAGTGGGTTTCGAGGAGAAAC<br>BiFC-R:cgcGTTCGACCCGTACGGTGACCCAGTTATTG<br>OE-F:cgCCATGGAGTGGGTTTCGAGGA<br>OE-R:<br>gcTCTAGAgCAGATCTTCTTCAGAGATCAGTTTCTGTTCCAGATCTTCTTCAGAGAT<br>CAGTTTCTGTTCTCCACCTCCGGGCGCGCCGTCGACGGGCCCCCGTACGGTGACCC<br>AGTTATT                                                                                                                                                                                                                                                                                     |
| <i>BnaMAPKKK20</i> | Q-F:TATGTCTCGTCCGAGTCAGAGATTCAA<br>Q-R:GACCCAGCCTTCGGAGACAGAC<br>F:cgccATGGAGTGGGTTTCGTGGAG<br>R:cgcgtcgacCCGTACGGTGACCCAGCC<br>BiFC-F:ggactagtGAGTGGGTTTCGTGGAGAAAC<br>BiFC-R:cgcgtcgacCCGTACGGTGACCCAGCC                                                                                                                                                                                                                                                                                                                                                                                           |
| <i>BnaZIK2</i>     | Q-F:GCTGACGGAAGAGGCTAGAATAAGA<br>Q-R:CCGCGTAAGGTGGCTGAAAC<br>F:catgccATGGTAAACATGAATCAGCTTTCTGAGTATGTAG<br>R:cgcgtcgacCTACCGCCTTGAACCTCGGTGG<br>BiFC-F:ggactagtATGGTAAACATGAATCAGC<br>BiFC-R:cgcgtcgacCTACCGCCTTGAACCTCGGTGG                                                                                                                                                                                                                                                                                                                                                                         |
| <i>BnaZIK3</i>     | Q-F:TGGCCGGAGAATGAGATAAGGAGA<br>Q-R:GGCGTCGACGGGAAGTGAGA<br>F:cgccATGGACAATGGTGAAGAAAGCTTCGTTGAAG<br>R:egggatccTCATATATCCACGGCGTCGAC                                                                                                                                                                                                                                                                                                                                                                                                                                                                 |
| <i>BnaZIK4</i>     | Q-F:GCAACAGCAGGAGAGCCGAGA<br>Q-R:ATAGAGACGGTAAAAACGAGAACGA<br>F:catgccATGGACAACAATCTGGTGAGTTATCTTGAGC<br>R:cgcgtcgacAGATTCAATGGCATCGACAGG                                                                                                                                                                                                                                                                                                                                                                                                                                                            |
| <i>BnaZIK8</i>     | Q-F:ACCCCGCCATGACCGAGAG<br>Q-R:CAAGGCGATGATGCTGCTGTTC<br>F:catgccATGGTACTTCCTTGTGCGAGCTCC                                                                                                                                                                                                                                                                                                                                                                                                                                                                                                            |

*BnaRaf17* R:cgggatccTCAAGAAACAACACGACCAGTTCC  
 Q-F:CGAGCCATACGAAGCAGCAAAAC  
 Q-R:AGCCCCAGTGGTGATCAGAAGGTA  
 F:cgccATGGAGAGCTCCGAAGCGTCGGCGGCT  
 R:cgcgctgacTGAAGTGAATAAGCCCCAGTGG

*BnaRaf28* Q-F:AACGGTCCCAGCTGATTGTCTCC  
 Q-R:AACGGGCTTTCTCGCAGTCG  
 F:cgccATGGAGCTTGAGGGACCTAAGTTCGATATGC  
 R:cgcgctgacGTCGATTGTCATTGGTTGCGTC  
 BiFC-F:ggactagtATGCTTGAGGGACCTAAG  
 BiFC-R:cgcgctgacGTCGATTGTCATTGGTTGCGTC

*BnaRaf29* Q-F:GCGATCGTGCTGTGGAACTT  
 Q-R:ATCTGGTCTTTGAGCTGGGTCTTGT  
 F:cgccATGGCGATCAAAGACGAGACG  
 R:cgcgctgacATGGTGGCCTTTTCTTAGACCTG

*BnaRaf30* Q-F:CTACGGGATTGTGCTATGGGAGTT  
 Q-R:GGATGCGTCTTCTCGGTATTTTC  
 F:ttaggtcATGATCGTGGTGATGGAGAGTTGCGG  
 R:cgcgctgacTCAATGATGTGTTGCACTTCTCCT

*BnaRaf34* Q-F:CACTATTGCCACCGGATTCACCT  
 Q-R:TTTGTCTTCAGTTTTAGCCTTTGGAGT  
 F:cttaggtcATGATCCTTGCTATGGATTCAATGAATGGATACAG  
 R:cgcgctgacATAACATTGATTGAAGCAGAAAAACAAACC

*BnaRaf35* Q-F:GGAAAGTTGTTGGGCATCTGAGC  
 Q-R:CTGCACCATCGCCATCTTCTTTT  
 F:GGAATTCATGTGCAGCAGTAATCGCG  
 R:cgcgctgacTTTCAAATTCATAGCAGCAGCCATATTC

*BnaRaf36* Q-F:GCTCTGCCATGCCTAACCTAAAT  
 Q-R:TCCCATAAACATCGAATCACAAACC  
 F:cttaggtcatgATCGATGAAGAGGCTTCTTCTTGATT  
 R:cgcgctgacAGCGAATTTAGGGTTAGGCATG

*BnaRaf39* Q-F:CAGAGATGGAGGAAGTCGTGAAGA  
 Q-R:ATAATAAGATGGCCAAAGAGGGGTAA  
 F:cgCCATGGAAACACCAAACGAGATAAAAAGCTT  
 R:ccCCCGGGTCAAGGACCACGACCGGAG

*BnaCTR1* F:ttaggtcATGATCGAAATGCCCGGCGCTAGAAG  
 R:ccCCCGGGCATATCCAAGCGATTAGGTGGAGGAAC

*BnaRaf21* F:cgCCATGGATACGAATACAGATGAATCGGAGAG  
 cgcGTCGACTGGTACGACGTTTACTTCAGTCATTAT

*BnaRaf22* F:cgCCATGGTACTTGACGGAGCAAAGTTCAAC  
 cgggatccTTAGTCGATAGTCATAGTTGACTCATAAC

*BnaRaf23* F:cgCCATGGCGAACATCGCGGGACA  
 cgcGTCGACTTTCCAAGGAACTTGAATGTATCTTTT

*BnaRaf27* F:cgCCATGGAAAGATGATTACAAAACGCCG  
 R:cgcGTCGACCAAATGTGAACCGGATGATGAG

*BnaRaf33* F:cgCCATGGTAAAGGAAGGAAACGACGGGT  
 R:cgcGTCGACCCAAACAGAACAACAAAGGAAAGTTTAA

*BnaRaf37* F:cgCCATGGTACCTCGCGGGTACCAACGA  
 R:GGAATTCCTTGAAATACAATCTCTGAAGATCTTGAG

*BnaRaf41* F:ttaggtcATGATCGGATCTGCAAGTGGGTTTTACTC  
 R:cgcGTCGACTGAGCAGCAGAAGAAGAAGCT

*BnaRaf46* F:cgCCATGGAGAACGTAGCGGCGC

*BnaZIK5* R:cgcGTCGACTTTCCAAGGAACTTGAATGTGTCTTTCC  
 F:ggaattcCATATGGACGGTGCAGAGGATGC  
*BnaZIK6* R:cgcGTCGACACCAGCTTGTCTACCTTCTTCTGAGATAAC  
 F:ggaattcCATATGGCTTTTGGATCTTCTGGAAC  
*BnaZIK9* R:cgggatccTCACAAACCTTTTTGCTTTTTTCATAATCC  
 F:cgcCCATGGTAATGAACAACATCAGCCATCTTGAATC  
*BnaMKK1* R:cgcGTCGACGTCACCTTGACCTACAAGAAAACACC  
 F:GGAATTCCATATGAAGAGAGGCAGCTTGAGTC  
*BnaMKK2* R:CGGGATCCTAGCTGTTAGCTAGTGGGGG  
 F:GGAATTCCATATGAAGAAGGGTGGATTCAGCAATAATC  
 R:CGGGATCCTTAAACGGAGAATGTACCAGACAGATTC  
 BiFC-F:cgcGGATCCATGAAGAAGGGTGGATTCAG  
 BiFC-R:CGCGTCGACAACGGAGAATGTACCAGAC  
*BnaMKK3* F:GGAATTCCATATGGCAGCATTGGAGGAACTA  
 R:CGGGATCCTTAACTTGTAATATAAAGCTCTTGCTTAGC  
 BiFC-F:gcTCTAGAATGGCAGCATTGGAGGAACTA  
 BiFC-R:gggatccACTTGTAATATAAAGCTCTTG  
*BnaMKK4* F:GGAATTCCATATGAAACCAATCCAACCGCC  
 R:CGGAATTCTACGTCGTTGGGGAAGAAGAAG  
*BnaMKK5* F:ggaattccatATGGCCATGAGACGAAACAAACGTCCT  
 R:cgcgctcgacCTAAGACGCCGGAGGCGGCG  
 BiFC-F:gctctagaATGGCCATGAGACGAAAC  
 BiFC-R:CGCGTCGACAGACGCCGGAGGCGGCG  
*BnaMKK6* F:ggaattccatATGAAGCTCAAATCGAACTTGAAGC  
 R:cggatccTTATCTAAGGCAGTTAACAGGTGGTTC  
 BiFC-F:gctctagaATGAAGCTCAAATCGAACTTG  
 BiFC-R:CGCGTCGACTCTAAGGCAGTTAACAGGTG  
*BnaMKK8* F:gcCCATGggcAATCTCAAGCTTTCTCTTCCAC  
 R:cGAGCTCATCTTGCTGGAGAAGAAAAGGG  
*BnaMKK9* F:ggaattccatATGGCTCTTGTTAGAGAACGTCG  
 R:cgggatccTCAAAGCTCTTCCTGGAGAAAAG  
 BiFC-F:cgcGGATCCATGGCTCTTGTTAGAGAACGT  
 BiFC-R:cgcGTCGACAAGCTCTTCCTGGAGAAAAG  
 BnaMKK9-K74R-Fwd AACACTCTCTACGCTCTGAGAACAGTCAACGGC  
 BnaMKK9-K74R-Rvs GTCGCCGTTGACTGTTCTCAGAGCGTAGAGA  
 MKK9-GW-F  
 GGGGACAAGTTTGTACAAAAAAGCAGGCTTCATGGCTCTTGTTAGAGAACGTCG  
 MKK9-GW-R  
 GGGGACCACTTTGTACAAGAAAGCTGGGTCTCAAAGCTCTTCCTGGAGAAAAGG  
 BnaMKK9-S193D/S199E-F GTCCGGGAATTGGATTCTTGCAACGAATAT  
 BnaMKK9-S193D/S199E-R GACATATTCGTTGCAAGAATCCAATCCCCG  
*U5-attB1* G GGG ACAAGTTTGTACAAAAAAGCAGGCTTCcATG  
*U3-attB2* GGG GACCACTTTGTACAAGAAAGCTGGGTCTCCACCTCCGGA  
*BnaUP1* Q-F: AGCCTGAGGAGATATTAGCAGGAA  
 Q-R: ATCTCACTGCAGCTCCACCAT  
*BnaUBC9* Q-F: GCATCTGCCTCGACATCTTGA  
 Q-R: GACAGCAGCACCTTGAAATG

Note: F and R are primers used for amplifying CDS and cloned into pGBKT7 or pGADT7. Q-F and Q-R are for real-time PCR, and GFP-F and GFP R are for GFP fusion. BiFC-F and BiFC-R are used for in vivo bimolecular fluorescence complementation (BiFC) analysis.



Table S3. MAPKKK sequences from different species used for phylogenetic analysis.

| <b>Species</b>              | <b>Taxon name</b> | <b>Synonyms</b>      | <b>GenBank<br/>Accession No. or<br/>locus No.</b> | <b>Subfamily</b> |     |
|-----------------------------|-------------------|----------------------|---------------------------------------------------|------------------|-----|
| <i>Arabidopsis thaliana</i> | AtMAPKKK1         | AtANP1               | At1g09000                                         | MEKK             |     |
|                             | AtMAPKKK2         | AtANP2               | At1g54960                                         | MEKK             |     |
|                             | AtMAPKKK3         | AtMAPKKK3 $\alpha$   | At1g53570                                         | MEKK             |     |
|                             | AtMAPKKK4         |                      | At1g63700                                         | MEKK             |     |
|                             | AtMAPKKK5         | AtMAP3K $\gamma$     | At5g66850                                         | MEKK             |     |
|                             | AtMAPKKK6         | AtMAP3K $\epsilon$ 2 | At3g07980                                         | MEKK             |     |
|                             | AtMAPKKK7         | AtMAP3K $\epsilon$ 1 | At3g13530                                         | MEKK             |     |
|                             | AtMAPKKK8         | AtMEKK1              | At4g08500                                         | MEKK             |     |
|                             | AtMAPKKK9         |                      | At4g08480                                         | MEKK             |     |
|                             | AtMAPKKK10        | AtMEKK3              | At4g08470                                         | MEKK             |     |
|                             | AtMAPKKK11        | AtMEKK4              | At4g12020                                         | MEKK             |     |
|                             | AtMAPKKK12        | AtANP3               | At3g06030                                         | MEKK             |     |
|                             | AtMAPKKK13        |                      | At1g07150                                         | MEKK             |     |
|                             | AtMAPKKK14        |                      | At2g30040                                         | MEKK             |     |
|                             | AtMAPKKK15        |                      | At5g55090                                         | MEKK             |     |
|                             | AtMAPKKK16        |                      | At4g26890                                         | MEKK             |     |
|                             | AtMAPKKK17        |                      | At2g32510                                         | MEKK             |     |
|                             | AtMAPKKK18        |                      | At1g05100                                         | MEKK             |     |
|                             | AtMAPKKK19        |                      | At5g67080                                         | MEKK             |     |
|                             | AtMAPKKK20        |                      | At3g50310                                         | MEKK             |     |
|                             | AtMAPKKK21        |                      | At4g36950                                         | MEKK             |     |
|                             |                   | AtZIK1               | WNK5                                              | At3g51630        | ZIK |
|                             |                   | AtZIK2               | WNK4                                              | At5g58350        | ZIK |
|                             |                   | AtZIK3               | WNK2                                              | At3g22420        | ZIK |
|                             |                   | AtZIK4               | WNK1                                              | At3g04910        | ZIK |
|                             |                   | AtZIK5               | WNK6                                              | At3g18750        | ZIK |
|                             |                   | AtZIK6               | WNK8                                              | At5g41990        | ZIK |
|                             |                   | AtZIK7               | WNK7                                              | At1g49160        | ZIK |
|                             |                   | AtZIK8               |                                                   | At5g55560        | ZIK |
|                             |                   | AtZIK9               | WNK9                                              | At5g28080        | ZIK |
|                             |                   | AtZIK10              | WNK10                                             | At1g64630        | ZIK |
|                             |                   | AtZIK11              | WNK3                                              | At3g48260        | ZIK |
|                             |                   | AtRaf1               | AtCTR1                                            | At5g03730        | Raf |
|                             |                   | AtRaf2               | AtEDR1                                            | At1g08720        | Raf |
|                             |                   | AtRaf3               | AtMAP3K $\delta$ 1                                | At5g11850        | Raf |
|                             |                   | AtRaf4               |                                                   | At1g18160        | Raf |
|                             |                   | AtRaf5               |                                                   | At1g73660        | Raf |
|                             |                   | AtRaf6               | AtMAP3K $\delta$ 5                                | At4g24480        | Raf |
|                             |                   | AtRaf7               |                                                   | At3g06620        | Raf |
|                             |                   | AtRaf8               |                                                   | At3g06630        | Raf |
|                             |                   | AtRaf9               |                                                   | At3g06640        | Raf |

|                       |             |                      |           |      |
|-----------------------|-------------|----------------------|-----------|------|
|                       | AtRaf10     | AtMAP3Kh3            | At5g49470 | Raf  |
|                       | AtRaf11     |                      | At1g67890 | Raf  |
|                       | AtRaf12     | AtMAP3K $\delta$ 4   | At4g23050 | Raf  |
|                       | AtRaf13     | AtMAP3Kq1            | At2g31010 | Raf  |
|                       | AtRaf14     | AtMAP3Kq2            | At2g42630 | Raf  |
|                       | AtRaf15     |                      | At3g58640 | Raf  |
|                       | AtRaf16     |                      | At1g04700 | Raf  |
|                       | AtRaf17     |                      | At1g14000 | Raf  |
|                       | AtRaf18     |                      | At1g16270 | Raf  |
|                       | AtRaf19     |                      | At1g62400 | Raf  |
|                       | AtRaf20     |                      | At1g79570 | Raf  |
|                       | AtRaf21     |                      | At2g17700 | Raf  |
|                       | AtRaf22     |                      | At2g24360 | Raf  |
|                       | AtRaf23     |                      | At2g31800 | Raf  |
|                       | AtRaf24     |                      | At2g35050 | Raf  |
|                       | AtRaf25     |                      | At2g43850 | Raf  |
|                       | AtRaf26     |                      | At4g14780 | Raf  |
|                       | AtRaf27     |                      | At4g18950 | Raf  |
|                       | AtRaf28     |                      | At4g31170 | Raf  |
|                       | AtRaf29     |                      | At4g35780 | Raf  |
|                       | AtRaf30     |                      | At4g38470 | Raf  |
|                       | AtRaf31     |                      | At5g01850 | Raf  |
|                       | AtRaf32     |                      | At5g40540 | Raf  |
|                       | AtRaf33     |                      | At5g50000 | Raf  |
|                       | AtRaf34     |                      | At5g50180 | Raf  |
|                       | AtRaf35     |                      | At5g57610 | Raf  |
|                       | AtRaf36     |                      | At5g58950 | Raf  |
|                       | AtRaf37     |                      | At5g66710 | Raf  |
|                       | AtRaf38     |                      | At3g01490 | Raf  |
|                       | AtRaf39     |                      | At3g22750 | Raf  |
|                       | AtRaf40     |                      | At3g24720 | Raf  |
|                       | AtRaf41     | ATN1                 | At3g27560 | Raf  |
|                       | AtRaf42     |                      | At3g46920 | Raf  |
|                       | AtRaf43     |                      | At3g46930 | Raf  |
|                       | AtRaf44     |                      | At3g50720 | Raf  |
|                       | AtRaf45     | ATN1-like            | At3g50730 | Raf  |
|                       | AtRaf46     |                      | At3g59830 | Raf  |
|                       | AtRaf47     |                      | At3g58760 | Raf  |
|                       | AtRaf48     | AtMRK1               | At3g63260 | Raf  |
| <i>Brassica napus</i> | BnaMAPKKK3  | BnMAP3K $\alpha$ 1   | CAA08995  | MEKK |
|                       | BnaMAPKKK6  | BnMAP3K $\epsilon$ 1 | CAB54520  | MEKK |
|                       | BnaMAPKKK8  | BnMAP3K $\beta$ 1    | CAA08997  | MEKK |
|                       | BnaMAPKKK17 |                      | KC190095  | MEKK |
|                       | BnaMAPKKK18 |                      | KC190096  | MEKK |
|                       | BnaMAPKKK19 |                      | KC190097  | MEKK |
|                       | BnaMAPKKK20 |                      | KC190098  | MEKK |
|                       | BnaZIK2     |                      | KC190099  | ZIK  |

|                      |             |           |      |
|----------------------|-------------|-----------|------|
|                      | BnaZIK3     | KC190100  | ZIK  |
|                      | BnaZIK4     | KC190101  | ZIK  |
|                      | BnaZIK5     | TC171979  | ZIK  |
|                      | BnaZIK6     | KF129405  | ZIK  |
|                      | BnaZIK8     | KC190102  | ZIK  |
|                      | BnaZIK9     | KF129406  | ZIK  |
|                      | BnaRaf17    | KC190103  | Raf  |
|                      | BnaRaf28    | KC190104  | Raf  |
|                      | BnaRaf29    | KC190105  | Raf  |
|                      | BnaRaf30    | KC190106  | Raf  |
|                      | BnaRaf34    | KC190107  | Raf  |
|                      | BnaRaf35    | KC190108  | Raf  |
|                      | BnaRaf36    | KC190109  | Raf  |
|                      | BnaRaf39    | KC190110  | Raf  |
|                      | BnaCTR1     | KF129395  | Raf  |
|                      | BnaRaf21    | KF129396  | Raf  |
|                      | BnaRaf22    | KF129397  | Raf  |
|                      | BnaRaf23    | KF129398  | Raf  |
|                      | BnaRaf27    | KF129399  | Raf  |
|                      | BnaRaf33    | KF129400  | Raf  |
|                      | BnaRaf37    | KF129401  | Raf  |
|                      | BnaRaf41    | KF129402  | Raf  |
|                      | BnaRaf46    | KF129403  | Raf  |
| <i>Brassica rapa</i> | BraMAPKKK1  | Bra018588 | MEKK |
|                      | BraMAPKKK4  | Bra027792 | MEKK |
|                      | BraMAPKKK5  | Bra012110 | MEKK |
|                      | BraMAPKKK6  | Bra031828 | MEKK |
|                      | BraMAPKKK7  | Bra001280 | MEKK |
|                      | BraMAPKKK8  | Bra027424 | MEKK |
|                      | BraMAPKKK10 | Bra039396 | MEKK |
|                      | BraMAPKKK11 | Bra001510 | MEKK |
|                      | BraMAPKKK12 | Bra000647 | MEKK |
|                      | BraMAPKKK13 | Bra039693 | MEKK |
|                      | BraMAPKKK14 | Bra037860 | MEKK |
|                      | BraMAPKKK15 | Bra029454 | MEKK |
|                      | BraMAPKKK16 | Bra020785 | MEKK |
|                      | BraMAPKKK17 | Bra015556 | MEKK |
|                      |             | Bra018344 | MEKK |
|                      |             | Bra022773 | MEKK |
|                      |             | Bra002933 | MEKK |
|                      |             | Bra035552 | MEKK |
|                      |             | Bra028991 | MEKK |
|                      |             | Bra026395 | MEKK |
|                      |             | Bra010423 | MEKK |
|                      |             | Bra018228 | MEKK |
|                      |             | Bra021794 | MEKK |
|                      |             | Bra005599 | MEKK |

|             |           |      |
|-------------|-----------|------|
| BraMAPKKK18 | Bra015388 | MEKK |
| BraMAPKKK19 | Bra012131 | MEKK |
| BraMAPKKK20 | Bra036070 | MEKK |
| BraMAPKKK21 | Bra030001 | MEKK |
|             | Bra011739 | MEKK |
| BraRaf1     | Bra009514 | Raf  |
|             | Bra005778 | Raf  |
| BraRaf2     | Bra031639 | Raf  |
|             | Bra006122 | Raf  |
| BraRaf3     | Bra023347 | Raf  |
|             | Bra025927 | Raf  |
| BraRaf4     | Bra015976 | Raf  |
| BraRaf5     | Bra013806 | Raf  |
| BraRaf6     | Bra029594 | Raf  |
|             | Bra040282 | Raf  |
| BraRaf7     | Bra040281 | Raf  |
|             | Bra001205 | Raf  |
| BraRaf9     | Bra036141 | Raf  |
| BraRaf10    | Bra019338 | Raf  |
| BraRaf12    | Bra021687 | Raf  |
| BraRaf13    | Bra022820 | Raf  |
|             | Bra007408 | Raf  |
| BraRaf15    | Bra003347 | Raf  |
|             | Bra015343 | Raf  |
| BraRaf16    | Bra019692 | Raf  |
| BraRaf17    | Bra026867 | Raf  |
|             | Bra026049 | Raf  |
| BraRaf18    | Bra026726 | Raf  |
|             | Bra026072 | Raf  |
|             | Bra027048 | Raf  |
| BraRaf19    | Bra036661 | Raf  |
|             | Bra027847 | Raf  |
| BraRaf20    | Bra035125 | Raf  |
|             | Bra003603 | Raf  |
|             | Bra002078 | Raf  |
| BraRaf21    | Bra024497 | Raf  |
|             | Bra037258 | Raf  |
|             | Bra007857 | Raf  |
| BraRaf22    | Bra032102 | Raf  |
|             | Bra007860 | Raf  |
|             | Bra021744 | Raf  |
| BraRaf23    | Bra022866 | Raf  |
|             | Bra021945 | Raf  |
| BraRaf24    | Bra022999 | Raf  |
|             | Bra037067 | Raf  |
| BraRaf26    | Bra013363 | Raf  |
| BraRaf27    | Bra020982 | Raf  |

|          |           |     |
|----------|-----------|-----|
|          | Bra011250 | Raf |
|          | Bra024020 | Raf |
| BraRaf28 | Bra010247 | Raf |
|          | Bra007859 | Raf |
| BraRaf29 | Bra010516 | Raf |
|          | Bra011897 | Raf |
| BraRaf30 | Bra010744 | Raf |
|          | Bra015215 | Raf |
| BraRaf31 | Bra028913 | Raf |
| BraRaf32 | Bra025563 | Raf |
| BraRaf33 | Bra000605 | Raf |
| BraRaf34 | Bra000612 | Raf |
| BraRaf35 | Bra006812 | Raf |
|          | Bra020343 | Raf |
| BraRaf36 | Bra006738 | Raf |
|          | Bra002606 | Raf |
| BraRaf37 | Bra012094 | Raf |
|          | Bra037152 | Raf |
| BraRaf38 | Bra039114 | Raf |
| BraRaf39 | Bra033921 | Raf |
|          | Bra023811 | Raf |
| BraRaf41 | Bra025286 | Raf |
| BraRaf43 | Bra018183 | Raf |
| BraRaf46 | Bra007480 | Raf |
|          | Bra003392 | Raf |
| BraRaf47 | Bra007418 | Raf |
|          | Bra014553 | Raf |
| BraRaf48 | Bra007738 | Raf |
|          | Bra040440 | Raf |
| BraZIK1  | Bra036787 | ZIK |
|          | Bra002658 | ZIK |
| BraZIK2  | Bra020372 | ZIK |
|          | Bra006771 | ZIK |
|          | Bra029915 | ZIK |
| BraZIK3  | Bra039952 | ZIK |
|          | Bra001867 | ZIK |
| BraZIK4  | Bra040414 | ZIK |
|          | Bra001129 | ZIK |
| BraZIK5  | Bra037565 | ZIK |
|          | Bra001718 | ZIK |
| BraZIK6  | Bra028518 | ZIK |
|          | Bra002897 | ZIK |
| BraZIK8  | Bra035577 | ZIK |
|          | Bra028972 | ZIK |
| BraZIK9  | Bra009990 | ZIK |
|          | Bra036118 | ZIK |
| BraZIK11 | Bra019537 | ZIK |

|                     |            |                    |                                               |      |
|---------------------|------------|--------------------|-----------------------------------------------|------|
| <i>Oryza sativa</i> | OsMAPKKK1  | OsACDR1,OsE<br>DR1 | Os03g06410/AY1675<br>75                       | Raf  |
|                     | OsMAPKKK2  |                    | Os10g29540/AK1217<br>18                       | Raf  |
|                     | OsMAPKKK3  |                    | Os02g32610/AAF344<br>36                       | Raf  |
|                     | OsMAPKKK4  |                    | Os02g12810                                    | Raf  |
|                     | OsMAPKKK5  |                    | Os12g37570                                    | Raf  |
|                     | OsMAPKKK6  | DSM1               | Os02g50970/AK1027<br>67                       | Raf  |
|                     | OsMAPKKK7  |                    | Os06g12590/AK0995<br>00/AK105681              | Raf  |
|                     | OsMAPKKK8  |                    | Os11g10100                                    | MEKK |
|                     | OsMAPKKK9  |                    | Os02g44642/AK0730<br>40                       | MEKK |
|                     | OsMAPKKK10 |                    | Os04g47240                                    | MEKK |
|                     | OsMAPKKK11 |                    | Os07g02780/AK0698<br>89                       | MEKK |
|                     | OsMAPKKK12 |                    | Os09g39320                                    | Raf  |
|                     | OsMAPKKK13 |                    | Os09g21510                                    | MEKK |
|                     | OsMAPKKK14 |                    | Os04g52140/AK1208<br>98                       | Raf  |
|                     | OsMAPKKK15 |                    | Os08g32600/AK1030<br>87                       | MEKK |
|                     | OsMAPKKK16 |                    | Os04g35700/AK0616<br>22/AK068725              | MEKK |
|                     | OsMAPKKK17 |                    | Os09g37230/AK0726<br>90                       | Raf  |
|                     | OsMAPKKK18 |                    | Os03g55560                                    | MEKK |
|                     | OsMAPKKK19 |                    | Os02g35010/AK2878<br>89                       | MEKK |
|                     | OsMAPKKK20 | OsWNK1             | Os07g38530/DQ8375<br>32                       | ZIK  |
|                     | OsMAPKKK21 |                    | Os07g25680/AK2411<br>23                       | Raf  |
|                     | OsMAPKKK22 |                    | Os03g49640                                    | MEKK |
|                     | OsMAPKKK23 |                    | Os12g40279                                    | Raf  |
|                     | OsMAPKKK24 |                    | Os04g56530/AK0998<br>39                       | MEKK |
|                     | OsMAPKKK25 |                    | Os02g38080                                    | Raf  |
|                     | OsMAPKKK26 |                    | Os07g29330/AK0661<br>98                       | Raf  |
|                     | OsMAPKKK27 |                    | Os03g43760/AK2436<br>90                       | Raf  |
|                     | OsMAPKKK28 |                    | Os03g15570/AK2427<br>66/CT835152/<br>CT835203 | MEKK |
|                     | OsMAPKKK29 | OsWNK4             | Os02g45130/AK0738<br>45                       | ZIK  |
|                     | OsMAPKKK30 |                    | Os02g02780/AK0602<br>20                       | Raf  |
|                     | OsMAPKKK31 |                    | Os01g45380/AK1081<br>30                       | Raf  |
|                     | OsMAPKKK32 |                    | Os08g12750/AY1565<br>10                       | Raf  |

|            |        |                                                       |      |
|------------|--------|-------------------------------------------------------|------|
| OsMAPKKK33 |        | Os02g07790/AY1565<br>12                               | Raf  |
| OsMAPKKK34 |        | Os05g50190/AY2244<br>53                               | Raf  |
| OsMAPKKK35 |        | Os02g54510                                            | Raf  |
| OsMAPKKK36 | OsWnk2 | Os05g01780/AK0700<br>61                               | ZIK  |
| OsMAPKKK37 |        | Os04g51950/AY1565<br>11                               | Raf  |
| OsMAPKKK38 |        | Os06g45300/AY2244<br>31                               | Raf  |
| OsMAPKKK39 |        | Os06g08280/AK0677<br>71                               | Raf  |
| OsMAPKKK40 |        | Os01g48330/AK0708<br>08/AK102209<br>AK111983          | Raf  |
| OsMAPKKK41 |        | Os06g43840/AK2434<br>13                               | Raf  |
| OsMAPKKK42 |        | Os03g60150/CT8308<br>32                               | Raf  |
| OsMAPKKK43 | ILA1   | Os06g50920/AK0737<br>47                               | Raf  |
| OsMAPKKK44 |        | Os02g14530/AK1116<br>18                               | Raf  |
| OsMAPKKK45 |        | Os06g43030                                            | Raf  |
| OsMAPKKK46 | OsWnk6 | Os11g06140/AK0704<br>90                               | ZIK  |
| OsMAPKKK47 | OsWnk3 | Os07g08750/AK0605<br>52/AK100930                      | ZIK  |
| OsMAPKKK48 |        | Os01g01740/AK0594<br>60                               | Raf  |
| OsMAPKKK49 |        | Os05g44290                                            | Raf  |
| OsMAPKKK50 | OsWnk7 | Os12g02250/AK0674<br>47/AK072172                      | ZIK  |
| OsMAPKKK51 |        | Os01g54350/AK1024<br>67                               | Raf  |
| OsMAPKKK52 | OsWnk9 | Os12g06490/AK0628<br>12/AK073772                      | ZIK  |
| OsMAPKKK53 |        | Os11g02305                                            | ZIK  |
| OsMAPKKK54 |        | Os03g28300/CT8284<br>99                               | Raf  |
| OsMAPKKK55 |        | Os01g50400                                            | MEKK |
| OsMAPKKK56 |        | Os05g01780/AY3369<br>87                               | ZIK  |
| OsMAPKKK57 |        | Os05g46750                                            | MEKK |
| OsMAPKKK58 |        | Os03g39150                                            | Raf  |
| OsMAPKKK59 |        | Os12g41260/AK1096<br>96                               | Raf  |
| OsMAPKKK60 |        | Os03g53410                                            | Raf  |
| OsMAPKKK61 |        | Os01g10450/AK0695<br>37                               | Raf  |
| OsMAPKKK62 |        | Os01g50420                                            | MEKK |
| OsMAPKKK63 |        | Os01g50370                                            | MEKK |
| OsMAPKKK64 | OsWnk5 | Os07g39520/CT8322<br>00/AK072014<br>/AK072176/AK10526 | ZIK  |

|                                       |            |                                  |      |
|---------------------------------------|------------|----------------------------------|------|
|                                       | OsMAPKKK65 | Os07g43900                       | Raf  |
|                                       | OsMAPKKK66 | Os10g04010                       | MEKK |
|                                       | OsMAPKKK67 | Os10g04000                       | MEKK |
|                                       | OsMAPKKK68 | Os12g30570                       | Raf  |
|                                       | OsMAPKKK69 | Os05g46760/AK1059<br>46          | MEKK |
|                                       | OsMAPKKK70 | Os01g50410                       | MEKK |
|                                       | OsMAPKKK71 | Os02g21700                       | MEKK |
|                                       | OsMAPKKK72 | Os01g54480/AK1046<br>74          | Raf  |
|                                       | OsMAPKKK73 | Os03g18170                       | MEKK |
|                                       | OsMAPKKK74 | Os01g66860/AK0700<br>97          | Raf  |
|                                       | OsMAPKKK75 | Os02g39560/AK0719<br>22/AK099756 | Raf  |
| <i>Selaginella<br/>moellendorffii</i> | Sm86240    | 86240                            | MEKK |
|                                       | Sm139837   | 139837                           | MEKK |
|                                       | Sm65764    | 65764                            | MEKK |
|                                       | Sm73721    | 73721                            | MEKK |
|                                       | Sm113703   | 113703                           | MEKK |
|                                       | Sm55695    | 55695                            | MEKK |
|                                       | Sm82067    | 82067                            | MEKK |
|                                       | Sm164743   | 164743                           | MEKK |
|                                       | Sm76216    | 76216                            | MEKK |
|                                       | Sm444546   | 444546                           | MEKK |
|                                       | Sm438664   | 438664                           | MEKK |
|                                       | Sm74353    | 74353                            | MEKK |
|                                       | Sm73444    | 73444                            | MEKK |
|                                       | Sm126389   | 126389                           | ZIK  |
|                                       | Sm134331   | 134331                           | ZIK  |
|                                       | Sm11317    | 11317                            | ZIK  |
|                                       | Sm130367   | 130367                           | ZIK  |
|                                       | Sm10499    | 10499                            | Raf  |
|                                       | Sm24258    | 24258                            | Raf  |
|                                       | Sm40493    | 40493                            | Raf  |
|                                       | Sm97070    | 97070                            | Raf  |
|                                       | Sm96997    | 96997                            | Raf  |
|                                       | Sm56634    | 56634                            | Raf  |
|                                       | Sm131553   | 131553                           | Raf  |
|                                       | Sm130298   | 130298                           | Raf  |
|                                       | Sm146775   | 146775                           | Raf  |
|                                       | Sm20996    | 20996                            | Raf  |
|                                       | Sm115356   | 115356                           | Raf  |
|                                       | Sm146897   | 146897                           | Raf  |
|                                       | Sm118910   | 118910                           | Raf  |
|                                       | Sm444789   | 444789                           | Raf  |
|                                       | Sm88196    | 88196                            | Raf  |



|                              |                 |                 |      |
|------------------------------|-----------------|-----------------|------|
|                              | Sm63609         | 63609           | Raf  |
|                              | Sm34528         | 34528           | Raf  |
|                              | Sm271276        | 271276          | Raf  |
|                              | Sm160379        | 160379          | Raf  |
|                              | Sm57136         | 57136           | Raf  |
|                              | Sm105905        | 105905          | Raf  |
| <i>Physcomitrella patens</i> | Pp1s151_4V6.1   | Pp1s151_4V6.1   | MEKK |
|                              | Pp1s151_3V6.1   | Pp1s151_3V6.1   | MEKK |
|                              | Pp1s216_64V6.1  | Pp1s216_64V6.1  | MEKK |
|                              | Pp1s8_299V6.1   | Pp1s8_299V6.1   | MEKK |
|                              | Pp1s387_39V6.1  | Pp1s387_39V6.1  | MEKK |
|                              | Pp1s10_200V6.1  | Pp1s10_200V6.1  | MEKK |
|                              | Pp1s44_113V6.1  | Pp1s44_113V6.1  | MEKK |
|                              | Pp1s351_40V6.1  | Pp1s351_40V6.1  | MEKK |
|                              | Pp1s35_323V6.1  | Pp1s35_323V6.1  | MEKK |
|                              | Pp1s136_5V6.3   | Pp1s136_5V6.3   | MEKK |
|                              | Pp1s31_252V6.1  | Pp1s31_252V6.1  | MEKK |
|                              | Pp1s43_178V6.1  | Pp1s43_178V6.1  | MEKK |
|                              | Pp1s20_383V6.1  | Pp1s20_383V6.1  | MEKK |
|                              | Pp1s281_41V6.1  | Pp1s281_41V6.1  | MEKK |
|                              | Pp1s99_12V6.1   | Pp1s99_12V6.1   | MEKK |
|                              | Pp1s281_44V6.1  | Pp1s281_44V6.1  | MEKK |
|                              | Pp1s100_149V6.1 | Pp1s100_149V6.1 | MEKK |
|                              | Pp1s17_36V6.1   | Pp1s17_36V6.1   | MEKK |
|                              | Pp1s66_286V6.1  | Pp1s66_286V6.1  | MEKK |
|                              | Pp1s131_142V6.1 | Pp1s131_142V6.1 | MEKK |
|                              | Pp1s188_1V6.1   | Pp1s188_1V6.1   | MEKK |
|                              | Pp1s68_168V6.1  | Pp1s68_168V6.1  | MEKK |
|                              | Pp1s462_10V6.1  | Pp1s462_10V6.1  | Raf  |
|                              | Pp1s75_1V6.1    | Pp1s75_1V6.1    | Raf  |
|                              | Pp1s11_61V6.1   | Pp1s11_61V6.1   | Raf  |
|                              | Pp1s63_65V6.1   | Pp1s63_65V6.1   | Raf  |
|                              | Pp1s43_196V6.1  | Pp1s43_196V6.1  | Raf  |
|                              | Pp1s17_22V6.1   | Pp1s17_22V6.1   | Raf  |
|                              | Pp1s257_31V6.1  | Pp1s257_31V6.1  | Raf  |
|                              | Pp1s130_99V6.1  | Pp1s130_99V6.1  | Raf  |
|                              | Pp1s31_3V6.1    | Pp1s31_3V6.1    | Raf  |
|                              | Pp1s126_60V6.1  | Pp1s126_60V6.1  | Raf  |
|                              | Pp1s46_110V6.1  | Pp1s46_110V6.1  | Raf  |
| Pp1s96_95V6.1                | Pp1s96_95V6.1   | Raf             |      |
| Pp1s120_103V6.1              | Pp1s120_103V6.1 | Raf             |      |
| Pp1s66_220V6.1               | Pp1s66_220V6.1  | Raf             |      |
| Pp1s43_45V6.1                | Pp1s43_45V6.1   | Raf             |      |
| Pp1s69_199V6.1               | Pp1s69_199V6.1  | Raf             |      |
| Pp1s281_5V6.1                | Pp1s281_5V6.1   | Raf             |      |
| Pp1s118_90V6.1               | Pp1s118_90V6.1  | Raf             |      |
| Pp1s35_214V6.1               | Pp1s35_214V6.1  | Raf             |      |

|                                 |                     |                                              |      |
|---------------------------------|---------------------|----------------------------------------------|------|
|                                 | Pp1s93_69V6.1       | Pp1s93_69V6.1                                | Raf  |
|                                 | Pp1s131_116V6.1     | Pp1s131_116V6.1                              | Raf  |
|                                 | Pp1s244_9V6.1       | Pp1s244_9V6.1                                | Raf  |
|                                 | Pp1s172_82V6.1      | Pp1s172_82V6.1                               | Raf  |
|                                 | Pp1s85_87V6.1       | Pp1s85_87V6.1                                | Raf  |
|                                 | Pp1s31_260V6.1      | Pp1s31_260V6.1                               | Raf  |
|                                 | Pp1s19_317V6.1      | Pp1s19_317V6.1                               | Raf  |
|                                 | Pp1s136_112V6.1     | Pp1s136_112V6.1                              | Raf  |
|                                 | Pp1s74_259V6.1      | Pp1s74_259V6.1                               | Raf  |
|                                 | Pp1s402_19V6.1      | Pp1s402_19V6.1                               | Raf  |
|                                 | Pp1s375_32V6.1      | Pp1s375_32V6.1                               | Raf  |
|                                 | Pp1s248_25V6.1      | Pp1s248_25V6.1                               | Raf  |
|                                 | Pp1s78_106V6.1      | Pp1s78_106V6.1                               | Raf  |
|                                 | Pp1s180_6V6.1       | Pp1s180_6V6.1                                | Raf  |
|                                 | Pp1s392_39V6.1      | Pp1s392_39V6.1                               | Raf  |
|                                 | Pp1s237_2V6.1       | Pp1s237_2V6.1                                | ZIK  |
|                                 | Pp1s116_192V6.1     | Pp1s116_192V6.1                              | ZIK  |
|                                 | Pp1s384_6V6.1       | Pp1s384_6V6.1                                | ZIK  |
|                                 | Pp1s236_45V6.1      | Pp1s236_45V6.1                               | ZIK  |
|                                 | Pp1s236_53V6.1      | Pp1s236_53V6.1                               | ZIK  |
|                                 | OIRaf1              | estExt_GenewiseEukaryote.C_Chromosomes 46664 | Raf  |
|                                 | OIMAPKKK1           | e_gwEuk.16.135.1 37745                       | MEKK |
|                                 | OIRaf2              | estExt_GenewiseEukaryote.C_Chromosomes 45682 | Raf  |
|                                 | OIRaf3              | e_gwEuk.12.171.1 39208                       | Raf  |
|                                 | OIMAPKKK2           | e_gwEuk.13.217.1 41728                       | MEKK |
| <i>Ostreococcus lucimarinus</i> | OIZIK1              | estExt_fgenesH1_pg.C_Chromosomes 24885       | ZIK  |
|                                 | OIRaf4              | gwEuk.20.241.1 6189                          | Raf  |
|                                 | OIRaf5              | gwEuk.11.188.1 3085                          | Raf  |
|                                 | OIRaf6              | gwEuk.5.459.1 7730                           | Raf  |
|                                 | OIRaf7              | e_gwEuk.5.319.1 38832                        | Raf  |
|                                 | OIRaf8              | ost_05_007_076 87238                         | Raf  |
|                                 | OIRaf9              | e_gwEuk.17.220.1 42011                       | Raf  |
|                                 | OIRaf10             | gwEuk.14.176.1 3629                          | Raf  |
|                                 | OIRaf11             | estExt_Genewise_ext.Chromosomes 50798        | Raf  |
|                                 | OIRaf12             | gwEuk.11.262.1 5051                          | Raf  |
| <i>Ostreococcus tauri</i>       | OtMAPKKK $\alpha$ 1 | XP_003082588                                 |      |
| <i>Nicotiana tabacum</i>        | NtNPK1              | AB055514                                     | MEKK |
| <i>Nicotiana benthamiana</i>    | NbMAPKKK $\alpha$   | AY500155                                     | MEKK |
|                                 | NbMAPKKK $\beta$    | AB649283                                     | MEKK |

|                                |                       |          |      |
|--------------------------------|-----------------------|----------|------|
|                                | NbMAPKKK $\gamma$     | AB649284 | MEKK |
|                                | NbMAPKKK $\epsilon$ 2 | AB649285 | MEKK |
| <i>Solanum lycopersicum</i>    | SIMAPKKK $\epsilon$   | GU192457 | MEKK |
| <i>Lycopersicon esculentum</i> | LeMAPKKK $\alpha$     | AY500156 | MEKK |
| <i>Drosophila melanogaster</i> | DmWNK                 | AGB94867 | ZIK  |
| <i>Caenorhabditis elegans</i>  | CeWNK                 | CCE71534 | ZIK  |

---

The respective MAPKKK sequences, except those from canola, were either downloaded from the rice genome annotation project (<http://rice.plantbiology.msu.edu>), public NCBI database (<http://www.ncbi.nlm.nih.gov>) according to published papers in Pubmed, or identified from Phytozome database ([www.phytozome.net](http://www.phytozome.net)) as described in the "Materials and methods" section. The protein name of each MAPKKK is depicted by a two to three-letter code denoting the species in combination with numbers or locus ID representing the chromosome localization in that species as shown in Phytozome database. The GenBank accession numbers represent the assigned codes of the sequences deposited in GenBank.

Table S4. Similarity and identity analysis of MAPKKK genes/proteins between Arabidopsis, rice and canola.

Please see the separate Excel file.

Table S5. Computational prediction of subcellular localizations of MAPKKK proteins in canola.

| protein     | Subcellular localization                                                                                                           |                                                                                                                                                    |                                                                                                               |
|-------------|------------------------------------------------------------------------------------------------------------------------------------|----------------------------------------------------------------------------------------------------------------------------------------------------|---------------------------------------------------------------------------------------------------------------|
|             | PSORT                                                                                                                              | CELLO                                                                                                                                              | ESLpred                                                                                                       |
| BnaMAPKKK17 | <i>chlo: 11.0,</i><br><i>cyto: 1.0,</i><br><i>mito: 1.0</i>                                                                        | <i>Chloroplast 2.362 *</i><br><i>Cytoplasmic 1.193</i>                                                                                             | <i>Cytoplasmic Reliability</i><br><i>Index= 2</i><br><i>Expected Accuracy=~ 75%</i>                           |
| BnaMAPKKK18 | <i>cyto: 11.0,</i><br><i>chlo: 1.0,</i><br><i>nucl: 1.0</i>                                                                        | <i>Cytoplasmic 2.006 *</i>                                                                                                                         | <i>Cytoplasmic Reliability</i><br><i>Index= 3 Expected Accuracy=~</i><br><i>94%</i>                           |
| BnaMAPKKK19 | <i>cyto: 5.0,</i><br><i>nucl: 3.0,</i><br><i>chlo: 2.0,</i><br><i>plas: 2.0,</i><br><i>cysk: 1.0</i>                               | <i>Cytoplasmic 2.524 *</i><br><i>Chloroplast 1.325</i>                                                                                             | <i>Cytoplasmic Reliability</i><br><i>Index= 5</i><br><i>Expected Accuracy=~ 98%</i>                           |
| BnaMAPKKK20 | <i>cyto: 6.0,</i><br><i>nucl: 5.0,</i><br><i>chlo: 3.0</i>                                                                         | <i>Cytoplasmic 2.344 *</i><br><i>Chloroplast 1.706 *</i>                                                                                           | <i>Cytoplasmic Reliability</i><br><i>Index= 3</i><br><i>Expected Accuracy=~ 94%</i>                           |
| BnaZIK2     | <i>nucl: 8.0,</i><br><i>cyto: 4.0,</i><br><i>chlo: 1.0</i>                                                                         | <i>Nuclear 2.246 *</i><br><i>Cytoplasmic 1.05</i><br><i>PlasmaMembrane 0.833</i><br><i>Mitochondrial 0.475</i><br><i>Chloroplast 0.213</i>         | <i>Cytoplasmic Reliability</i><br><i>Index= 1</i><br><i>Expected Accuracy=~ 53%</i>                           |
| BnaZIK3     | <i>nucl: 10.0,</i><br><i>cyto: 2.0,</i><br><i>cysk: 2.0</i>                                                                        | <i>Cytoplasmic 2.521 *</i><br><i>Nuclear 2.104 *</i>                                                                                               | <i>Nuclear Reliability</i><br><i>Index= 1</i><br><i>Expected Accuracy=~ 53%</i>                               |
| BnaZIK4     | <i>nucl: 11.0,</i><br><i>cyto: 2.0</i>                                                                                             | <i>Nuclear 3.247 *</i><br><i>Cytoplasmic 1.479</i>                                                                                                 | <i>Cytoplasmic Reliability</i><br><i>Index= 2</i><br><i>Expected Accuracy=~ 75%</i>                           |
| BnaZIK5     | <i>4.0, nucl:</i><br><i>2.5, cyto:</i><br><i>2.0, plas:</i><br><i>2.0, vacu:</i><br><i>2.0,</i><br><i>cysk_nucl:</i><br><i>2.0</i> | <i>Cytoplasmic 4.266 *</i><br><i>OuterMembrane 0.404</i><br><i>Extracellular 0.146</i><br><i>Periplasmic 0.115</i><br><i>InnerMembrane 0.070</i>   | <i>Cytoplasmic Protein</i><br><i>Details</i><br><i>Reliability Index= 2</i><br><i>Expected Accuracy=~ 75%</i> |
| BnaZIK6     | <i>nucl: 10.0,</i><br><i>cyto: 2.0,</i><br><i>chlo: 1.0</i>                                                                        | <i>Extracellular 1.818 *</i><br><i>Cytoplasmic 1.780 *</i><br><i>OuterMembrane 0.740</i><br><i>Periplasmic 0.476</i><br><i>InnerMembrane 0.186</i> | <i>Nuclear Protein</i><br><i>Reliability Index= 4</i><br><i>Expected Accuracy=~ 97%</i>                       |
| BnaZIK8     | <i>cyto: 4.5,</i><br><i>cyto_nucl:</i><br><i>4.5,</i><br><i>nucl: 3.5,</i><br><i>chlo: 3.0,</i><br><i>cysk: 2.0</i>                | <i>Cytoplasmic 2.280 *</i><br><i>Nuclear 1.633 *</i>                                                                                               | <i>Cytoplasmic Reliability</i><br><i>Index= 3</i><br><i>Expected Accuracy=~ 94%</i>                           |
| BnaZIK9     | <i>5.0, cyto:</i><br><i>5.0, cysk:</i><br><i>2.0, vacu:</i><br><i>1.0</i>                                                          | <i>Cytoplasmic 4.424 *</i><br><i>Extracellular 0.349</i><br><i>OuterMembrane 0.122</i><br><i>Periplasmic 0.089</i><br><i>InnerMembrane 0.016</i>   | <i>Nuclear ProteinReliability</i><br><i>Index= 2</i><br><i>Expected Accuracy=~ 75%</i>                        |

|          |                                                                                 |                                                                                                                 |                                                                                         |
|----------|---------------------------------------------------------------------------------|-----------------------------------------------------------------------------------------------------------------|-----------------------------------------------------------------------------------------|
| BnaCTR1  | chlo: 6.0,<br>pero: 3.0,<br>nucl: 2.0,<br>mito: 2.0                             | Periplasmic 1.876 *<br>Cytoplasmic 1.590 *<br>OuterMembrane 1.044<br>InnerMembrane 0.249<br>Extracellular 0.242 | Cytoplasmic Protein<br>Details<br><br>Reliability Index= 1<br>Expected Accuracy=~ 53%   |
| BnaRaf17 | cyto: 8.0,<br>nucl: 3.0,<br>plas: 2.0                                           | Mitochondrial 1.991 *<br>Cytoplasmic 1.959 *                                                                    | Cytoplasmic Reliability<br>Index= 3<br>Expected Accuracy=~ 94%                          |
| BnaRaf21 | cyto: 12.0,<br>chlo: 1.0                                                        | Cytoplasmic 4.321 *<br>Periplasmic 0.466<br>OuterMembrane 0.125<br>Extracellular 0.056<br>InnerMembrane 0.032   | Cytoplasmic Protein<br>Details<br><br>Reliability Index= 5<br>Expected Accuracy=~ 98%   |
| BnaRaf22 | chlo: 7.0,<br>cyto: 5.0,<br>nucl: 1.0                                           | Cytoplasmic 3.213 *<br>Periplasmic 1.065<br>InnerMembrane 0.607<br>Extracellular 0.062<br>OuterMembrane 0.054   | Mitochondrial Protein<br>Details<br><br>Reliability Index= 1<br>Expected Accuracy=~ 53% |
| BnaRaf23 | mito: 7.5,<br>chlo_mito: 6.2,<br>cyto_mito: 5.3, chlo: 3.5                      | Cytoplasmic 3.843 *<br>Periplasmic 1.103<br>InnerMembrane 0.028<br>OuterMembrane 0.018<br>Extracellular 0.008   | Cytoplasmic Protein<br>Details<br><br>Reliability Index= 2<br>Expected Accuracy=~ 75%   |
| BnaRaf27 | cyto: 8.0,<br>pero: 4.0,<br>nucl: 1.0                                           | Cytoplasmic 4.579 *<br>Periplasmic 0.384<br>InnerMembrane 0.019<br>Extracellular 0.012<br>OuterMembrane 0.006   | Cytoplasmic Protein<br>Details<br><br>Reliability Index= 1<br>Expected Accuracy=~ 53%   |
| BnaRaf28 | nucl: 3.0,<br>cyto: 3.0,<br>E.R.: 2.0,<br>pero: 2.0,<br>cysk: 2.0,<br>chlo: 1.0 | Mitochondrial 1.308 *<br>Cytoplasmic 1.151 *                                                                    | Cytoplasmic Reliability<br>Index= 1<br>Expected Accuracy=~ 53%                          |
| BnaRaf29 | cyto: 9.0,<br>nucl: 3.0,<br>chlo: 1.0                                           | Cytoplasmic 2.677 *<br>Nuclear 0.919                                                                            | Cytoplasmic Reliability<br>Index= 4<br>Expected Accuracy=~ 97%                          |
| BnaRaf30 | cyto: 11.0,<br>chlo: 2.0                                                        | Cytoplasmic 3.297 *                                                                                             | Cytoplasmic Reliability<br>Index= 5<br>Expected Accuracy=~ 98%                          |
| BnaRaf33 | cyto: 8.0,<br>chlo: 2.0,<br>nucl: 2.0,<br>cysk: 2.0                             | Cytoplasmic 3.517 *<br>Periplasmic 1.157<br>Extracellular 0.160<br>InnerMembrane 0.104<br>OuterMembrane 0.063   | Cytoplasmic Protein Reliability<br>Index= 3<br>Expected Accuracy=~ 94%                  |
| BnaRaf34 | cyto: 7.0,<br>cysk: 3.0,<br>chlo: 2.0,<br>nucl: 1.0                             | Cytoplasmic 2.985 *<br>Mitochondrial 0.897                                                                      | Cytoplasmic Reliability<br>Index= 4<br>Expected Accuracy=~ 97%                          |

|          |                                                               |                                                                                                                          |                                                                                                  |
|----------|---------------------------------------------------------------|--------------------------------------------------------------------------------------------------------------------------|--------------------------------------------------------------------------------------------------|
| BnaRaf35 | <i>nucl: 7.0,<br/>chlo: 5.0,<br/>mito: 2.0</i>                | <i>Nuclear 2.355 *<br/>Cytoplasmic 1.938 *</i>                                                                           | <i>Nuclear Reliability<br/>Index= 4<br/>Expected Accuracy=~ 97%</i>                              |
| BnaRaf36 | <i>nucl: 9.0,<br/>cyto: 4.0</i>                               | <i>Nuclear 1.990 *<br/>Chloroplast 1.277<br/>Mitochondrial 1.128</i>                                                     | <i>Nuclear Reliability<br/>Index= 4<br/>Expected Accuracy=~ 97%</i>                              |
| BnaRaf37 | <i>cyto: 5.0,<br/>chlo: 4.0,<br/>nucl: 4.0</i>                | <i>Cytoplasmic 3.421 *<br/>Periplasmic 1.024<br/>InnerMembrane 0.409<br/>OuterMembrane 0.096<br/>Extracellular 0.050</i> | <i>Cytoplasmic Protein<br/>Details<br/><br/>Reliability Index= 2<br/>Expected Accuracy=~ 75%</i> |
| BnaRaf39 | <i>cyto: 11.0,<br/>nucl: 2.0</i>                              | <i>Cytoplasmic 2.214 *<br/>Nuclear 1.422</i>                                                                             | <i>Cytoplasmic Reliability<br/>Index= 2<br/>Expected Accuracy=~ 75%</i>                          |
| BnaRaf41 | <i>cysk: 7.0,<br/>cyto: 4.0,<br/>chlo: 1.0,<br/>nucl: 1.0</i> | <i>Cytoplasmic 3.219 *<br/>Periplasmic 0.960<br/>InnerMembrane 0.643<br/>Extracellular 0.132<br/>OuterMembrane 0.047</i> | <i>Cytoplasmic Protein<br/>Details<br/><br/>Reliability Index= 3<br/>Expected Accuracy=~ 94%</i> |
| BnaRaf46 | <i>chlo: 10.0,<br/>mito: 3.0</i>                              | <i>Cytoplasmic 4.095 *<br/>Periplasmic 0.757<br/>OuterMembrane 0.083<br/>InnerMembrane 0.035<br/>Extracellular 0.030</i> | <i>Cytoplasmic Protein<br/>Details<br/><br/>Reliability Index= 1<br/>Expected Accuracy=~ 53%</i> |

---

Subcellular localizations are predicted using two different programs, one is PSORT (<http://psort.nibb.ac.jp>) and the other is CELLO v2.5 (<http://cello.life.nctu.edu.tw>) and the third is ESLPred (<http://www.imtech.res.in/raghava/eslpred/index.html>). *nucl*-nuclear, *cyto*-cytoplasm, *pp*-periplasm, *mito*-mitochondria, *chlo*-chloroplast, and *pm*-plasma membrane.

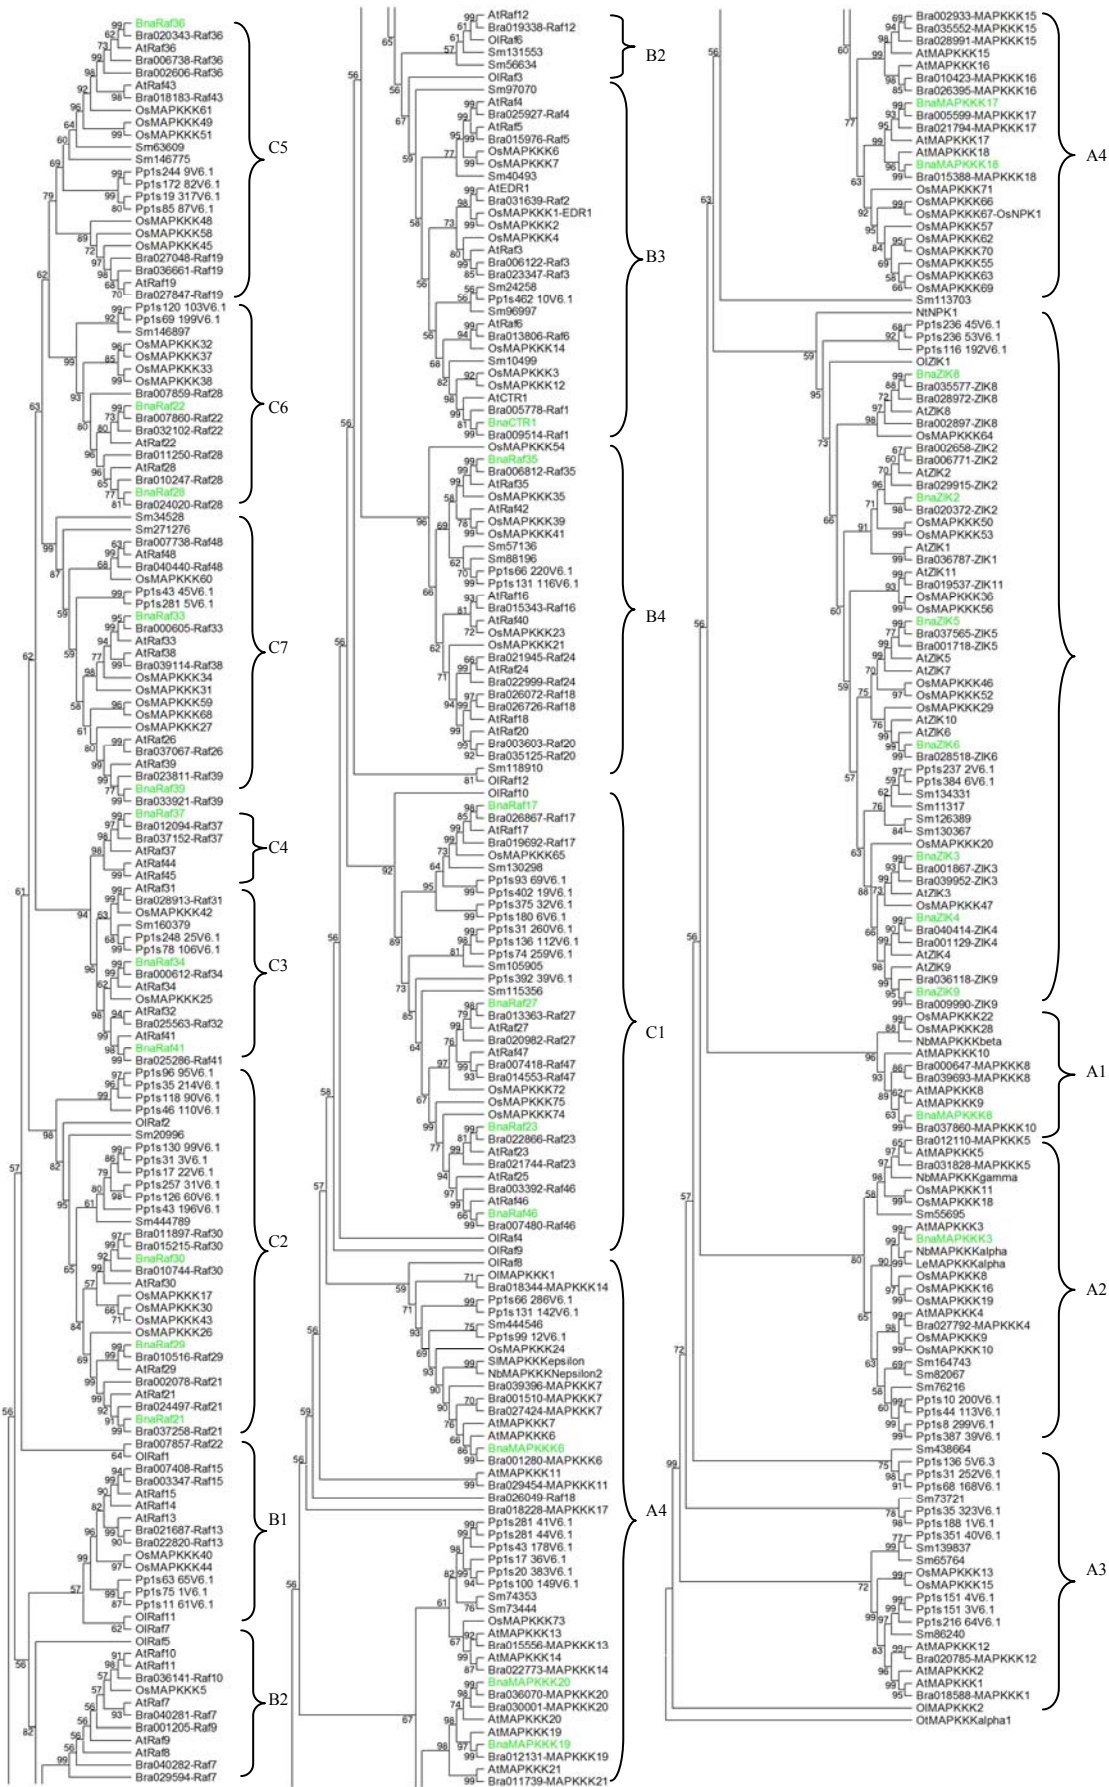

Figure S1 Phylogenetic analysis of MAPKKs from eight species. The evolutionary relationship was inferred using the maximum parsimony (MP) method implemented in MEGA5.1 program. For clarity



of presentation, the respective MAPKKK proteins are depicted by a two to three-letter code denoting the species in combination with numbers, locus ID or GenBank accession numbers representing the exact MAPKPK from that species. An MAPKKK from the marine green alga *Ostreococcus tauri* (*Ot*) was used to root the tree. The MAPKKK proteins from various species can be divided into three major groups (A to C), as supported by highly significant bootstrap values. The analysis involved 426 amino acid sequences. The numbers on the nodes are percentages from a bootstrap analysis of 500 replicates. There were a total of 5622 positions in the final dataset. The green highlighted proteins are from canola. The numbers on the nodes are percentages from a bootstrap analysis of 500 replicates. *Arabidopsis thaliana* (*At*), *Oryza sativa* (*Os*), *Brassica napus* (*Bna*), *Brassica rapa* (*Bra*), *Physcomitrella patens* (*Pp*), *Selaginella moellendorffii* (*Sm*), *Nicotiana tabacum* (*Nt*), *Nicotiana benthamiana* (*Nb*), *Solanum lycopersicum* (*Sl*), *Lycopersicon esculentum* (*Le*), *Ostreococcus lucimarinus* (*Ol*), and *occus tauri* (*Ot*) .

# A

BnaMAPKKK18 1 -----  
BnaMAPKKK17 1 -----  
BnaMAPKKK19 1 -----  
BnaMAPKKK20 1 -----  
BnaMAPKKK3 1 -----  
NbMAPKKK $\alpha$  1 -----  
BnaMAPKKK8 1 -----  
AtMEKK1 1 -----  
NbMAPKKK $\beta$  1 -----  
NbMAPKKK $\gamma$  1 -----  
BnaMAPKKK6 1 MARQMTSSQFHKSKTLDNKYMLGDEIGKGAYGRVYIGLDLENGDFVAIKQVSLLENIVQED  
consensus 1

BnaMAPKKK18 1 -----  
BnaMAPKKK17 1 -----  
BnaMAPKKK19 1 -----  
BnaMAPKKK20 1 -----  
BnaMAPKKK3 1 -----  
NbMAPKKK $\alpha$  1 -----  
BnaMAPKKK8 1 -----  
AtMEKK1 1 -----  
NbMAPKKK $\beta$  1 -----  
NbMAPKKK $\gamma$  1 -----  
BnaMAPKKK6 61 LNTIMQEIDLLKLNHNKNIIVKYLGLSLKTKTHLHIILEYVENGLANI IKPNKFGPFPEL  
consensus 61

BnaMAPKKK18 1 -----  
BnaMAPKKK17 1 -----  
BnaMAPKKK19 1 -----  
BnaMAPKKK20 1 -----  
BnaMAPKKK3 1 -----  
NbMAPKKK $\alpha$  1 -----  
BnaMAPKKK8 1 -----  
AtMEKK1 1 -----  
NbMAPKKK $\beta$  1 -----  
NbMAPKKK $\gamma$  1 -----  
BnaMAPKKK6 121 VTVYIAQVLEGLVYLHEQGV IHRDIKGANILTTKEGLVKLADFGVATKLN EADVNTHSVV  
consensus 121

BnaMAPKKK18 1 -----  
BnaMAPKKK17 1 -----  
BnaMAPKKK19 1 -----  
BnaMAPKKK20 1 -----  
BnaMAPKKK3 1 -----  
NbMAPKKK $\alpha$  1 -----  
BnaMAPKKK8 1 -----  
AtMEKK1 1 -----  
NbMAPKKK $\beta$  1 -----  
NbMAPKKK $\gamma$  1 -----  
BnaMAPKKK6 181 GTPYWM APEVIEMSGVCAASDIWSVGCTVIELLTCVPPYYDLQPM PALFRIVQDDSPPI P  
consensus 181

BnaMAPKKK18 1 -----  
 BnaMAPKKK17 1 -----  
 BnaMAPKKK19 1 -----  
 BnaMAPKKK20 1 -----  
 BnaMAPKKK3 1 -----MPTWVVRKSSKNKDDSHLLQTO  
 NbMAPKKKα 1 -----MPAWWGKKSTKNKETQSKEKER  
 BnaMAPKKK8 1 -----MDRI IARMK--KSSGRRG---DKTPTRRLERRDALKHINYDAAST  
 AtMEKK1 1 -----MDRILARMK--KSTGRRGGDNITPVRRLERDAARNINYDAASC  
 NbMAPKKKβ 1 -----MHRLPGIFAHKKRVDSKQKCAVSSSFKAKPKLERLNARKDIDYPCML  
 NbMAPKKKγ 1 -----MRWWQNAFSSSTSSSSASSSSSLSSKVHSDDSLITSSGGGGIRYT  
 BnaMAPKKK6 241 DSLSPDITDFLRQCFFKDSRQRPDAKTLSSHWPWIRNSRRALQSSLRHSGTIRYMKGADSS  
 consensus 241 k

BnaMAPKKK18 1 -----  
 BnaMAPKKK17 1 -----  
 BnaMAPKKK19 1 -----  
 BnaMAPKKK20 1 -----  
 BnaMAPKKK3 23 TRS-----VSDKSIRRI SADNS-KSSPDPVTPSRCTPRCSREFAGA  
 NbMAPKKKα 23 DKY-----VKPRSFDEVLRCRNSPRNSKDLNLGGSGSGFSGSGFSGF  
 BnaMAPKKK8 41 STWSAEDISAS---LVTRSLELPDRTSFRIFGGGDVEMDQIYKSLGLSGPDDLAI SFD  
 AtMEKK1 44 SSSSAEDLSVSTSSLMTRSLEFPEPTSFRIGGG-VGEMDRIYRSLGVSGPDDLAI SFD  
 NbMAPKKKβ 49 EFN-----GDSKSFRIEGHDSSELLDNFFFEKLGFSGPDDFAI PAAEW  
 NbMAPKKKγ 46 LKSAFF FARRRCHARAKKLQNLAEVDVDRSHYSENLSSSKCSSSSDRRPPPQPLPL  
 BnaMAPKKK6 301 SEKDGEGSQDIAESVSAEKVGM SKTNSKSKLGVGSFRSEKDQSSASDI GEERADSEDDIM  
 consensus 301 s

BnaMAPKKK18 1 -----  
 BnaMAPKKK17 1 -----  
 BnaMAPKKK19 1 -----  
 BnaMAPKKK20 1 -----  
 BnaMAPKKK3 63 SGFSD-----EKKCHPLPLPSLNDQVNGSVSGSGSVSSVSSSGSGE-----  
 NbMAPKKKα 64 DSGSS-----LDKAHPLRPSVGNQGVVLGCGSVSVSSTSSSGSSDGPVNT  
 BnaMAPKKK8 98 EACKKRSSSDVINRFKSFELDLHNFVPSLSEAAPSYGGMGENKPCLETPITITVKS RGY  
 AtMEKK1 103 EACKKRSSSDVVRNFKSFDDLKVRDQDLSEEGPSGVVVGSDSMNHKVQGD LSEAGPSGG  
 NbMAPKKKβ 90 DAMQLRSSS-----SSEVIGLGN SKIKDNI FEYNDIPIKSRDVVQLQISDASKADT  
 NbMAPKKKγ 106 PELQLLLRHADATF SNEPIVPLPSPTDAHNSHHKTGEERVKDT HKDGVAGHSRLSSQDA  
 BnaMAPKKK6 361 SDQGPTLSIHDNKSSLSSTCSISSDAKGT SQDGKSEPDGNLEMEASEGRRKASATKQVG  
 consensus 361

BnaMAPKKK18 1 -----  
 BnaMAPKKK17 1 -----  
 BnaMAPKKK19 1 -----  
 BnaMAPKKK20 1 -----  
 BnaMAPKKK3 105 -DQSQPTAPR-----KS  
 NbMAPKKKα 111 TDQAQFDILF-----RG  
 BnaMAPKKK8 158 LVPNHGDVAS-----GGGAGEDKR---GLVRTPTITVKS RGYLVPN-----QSD  
 AtMEKK1 163 IVTELSEIGNLITPVDRLVADGVVENRR---VMERTPTI-VKSKGYLVPNNVVAVGVGVG  
 NbMAPKKKβ 141 IRLEDCVTGN-----GAVLNGNEPVTLVRCGG-----GGG  
 NbMAPKKKγ 166 RKKKKEHLGSRLSRKTPQKLHVTD RVS DIRISVPI SAPTTPYAS PGLSPLKAEDFLSPNC  
 BnaMAPKKK6 421 KESSIQMQQRSHSFGPKGEDRGLRKAVKTPSSYGGNELTRFSDPPGDA CLHDLFHPLNKV  
 consensus 421

BnaMAPKKK18 1 -----  
 BnaMAPKKK17 1 -----  
 BnaMAPKKK19 1 -----  
 BnaMAPKKK20 1 -----  
 BnaMAPKKK3 116 N-----AAAASPKAGARPTSPLHNRFSGMTLESSSTGRNDDGRSSEYHPLP-----  
 NbMAPKKKα 123 NGDNRLSPLSRSPVRSRGTTTTSSPLHPRFSSMNLDSP-TGKLDNDVSSSESHQLP-----  
 BnaMAPKKK8 199 VGIKGVRRPVLKPPPAK-RPPIDHQ-GSSWDFLTHFAPEDGIVRRPSSSSTSDNG-----  
 AtMEKK1 219 GGIKGLRPPVLKPPAMPKRPPIDHR-GSSWDFLTHFAPSETVKRPSSSSSSSEDGCDEEEE  
 NbMAPKKKβ 171 GGIKGVRRPPLLAPPVMSLPIVDDSSCSTWDIFRAFGPKD-QRESGLCRSEVVGDAECV  
 NbMAPKKKγ 226 MAFPGAFQVCSAPEMPPSDTPHYPDFSYKVIPEKNAFSDNSPHQSPRTSPQRCKMASG  
 BnaMAPKKK6 481 PEGKLN EASASTPASNANQGDSPVADGGKNDLATKLRARIAQKQMEGETGHSNDGGDLFR  
 consensus 481 p s

BnaMAPKKK18 1 -----MGN  
 BnaMAPKKK17 1 -----ME  
 BnaMAPKKK19 1 -----ME  
 BnaMAPKKK20 1 -----ME  
 BnaMAPKKK3 162 -----LPPGSPTSPSVLPCSPTSPSSGVQGSWVVGSEKEISK  
 NbMAPKKKα 177 -----LPPGSPSPSALPNPRTCG-----VAEGSNVNMMSK  
 BnaMAPKKK8 252 ---EETLEEEV-----DTGDEACSFSTNEGGDSSSTVSN-TSPIYANG--GSIITS  
 AtMEKK1 278 GKEEEAEAEEMGARFIQLGDTAETCSFTTNEG--DSSSTVSN-TSPIYPDG--GAIITS  
 NbMAPKKKβ 230 KNEVDEEENSTSRRRIGVSNLLSESCSFTTTSNDDSSSSTTERMSSISPNGRFARYITY  
 NbMAPKKKγ 286 STSPLHNLLPNESSAARRECSAQGNVHPLPLPPLGATPSQQPTAIPVSPYAE LTPKGGQ  
 BnaMAPKKK6 541 LMMGV LKDDVIDIDGLVFDEKASPDNLLPLQAVEFSRLVSSLRPSETEDAI VTSCKLVA  
 consensus 541 m

### Motif 1

#### Serine/Threonine protein kinases active-site signature (L/I)GXGX(F/Y/T/S)(S/G/A)XVXX(G/A)X(5-18)AVK

BnaMAPKKK18 4 WTR E K T I G R G S S A T V Y A A T C Q D S ----- G E T I A V K S A E F H Q S E F L Q R E A K L L S S L N -- S  
 BnaMAPKKK17 3 W T R G R I I G R G S T A T V C A A T R H N S ----- N E I L A V K S S E L H R S E F L Q R E A E I L S S L S -- S  
 BnaMAPKKK19 3 W V R G E T I G H G I F S T V S L A T P T N N - A Y G A F P Q V M A V K S A D S H G A A S L A N E K W V L D I L G N D C  
 BnaMAPKKK20 3 W V R G E T I G Y G I F S T V S L A T P S N T K G S G E Y P S L M A V K S S N S Y G G -- I A N E K S V L D S L G - D C  
 BnaMAPKKK3 201 W K K G R F I G S G I F G K V Y Q G F N S E E G R I C A I K E V K V I S D D K N S K E C I K Q L N Q E I N V L S Q L C H  
 NbMAPKKKα 207 W K K G K L I G R G I F G H V Y L G F N R E N G Q M C A I K E V R V V S D D Q T S K E C I K Q L N Q E I I L L S N L S H  
 BnaMAPKKK8 298 W Q K G L L I G R G S F G S V F E G I S - G D G D F F A V K E V S L L E Q G S Q A Q E C I Q Q L E G E I A L L S Q L Q H  
 AtMEKK1 333 W Q K G Q L I G R G S F G S V Y E G I S - G D G D F F A V K E V S L L D Q G S Q A Q E C I Q Q L E G E I K L L S Q L Q H  
 NbMAPKKKβ 290 W D K G D L I G R G S F G S V Y E G I S - D D G F F F A V K E V S L L D Q G D G G R Q S L Y Q L E Q E I E L L S Q F E H  
 NbMAPKKKγ 346 W Q K G K L I G R G I F G S V Y V A S N R E T G A L C A M K E V E L L P D D P K S A E S I R Q L Q Q E I N V L S Q L K H  
 BnaMAPKKK6 601 M F R H R P E Q K V V F V T Q H G F L P V M D L L D S P K S R V T C A V L Q L I N E I I K D N I D F Q E N A C L V G L I  
 consensus 601 w k g k i i g r g s f g t v y a g a i k e v v v l q l e e i v l s n h

BnaMAPKKK18 56 P Y V I G Y R G C E V T K E P -- L A T Y N L L M E Y A P Y G T L A D V A A K N G G - C I D E A R ----- V V  
 BnaMAPKKK17 55 P Y V I G Y R G S E T K R E L N G V V T Y N L L M E Y A P Y G T L T D A A A K N G G - G L E E A M ----- I V  
 BnaMAPKKK19 62 D G I V R C L G E D R T V E N - G E E M H N L F L E Y A S R G S L A S H L K K L N G E G L P E S T ----- V R  
 BnaMAPKKK20 60 P E I V R C F G E D Q T V E K - G E K L H N L L L E Y A S R G S L A S Q L K K L N G E G L P E T T ----- V R  
 BnaMAPKKK3 261 P N I V Q Y Y G S E L S E E T ----- L S V Y L E F V S G G S I Y K L L T E Y G A F T E P V ----- I Q  
 NbMAPKKKα 267 P N I V R Y Y G S E L D D E T ----- L S V Y L E Y V S G G S I H K L L Q E Y G A F R E P V ----- I Q  
 BnaMAPKKK8 357 Q N I V R Y R G T A K D G S N ----- L Y I F L E L V T Q G S L S K L Y Q R Y - Q L M D S V ----- V S  
 AtMEKK1 392 Q N I V R Y R G T A K D G S N ----- L Y I F L E L V T Q G S L L K L Y Q R Y - Q L R D S V ----- V S  
 NbMAPKKKβ 349 E N I V R Y Y G T K D D S K ----- L Y I F L E L V T Q G S L L S L Y Q K Y - H L R D S Q ----- V S  
 NbMAPKKKγ 406 P N I V Q Y Y G S E I V G D R ----- F Y I Y L E Y V H P G S I N K F I H D H C E A I T E S - I ----- V R  
 BnaMAPKKK6 661 P L V M S H A G P E R D R S R E I R K E A A Y F L Q Q L C Q S S L T L Q M F I A C R G I P V L V G F L E A D Y A K Y R  
 consensus 661 p n i v r y G s e e l f l e y v s g s l l k g v

**Motif 2**  
**Protein kinases ATP-binding region signature**  
**(L/I/V/M/F/Y/C)XHXD(L/I/V)KXXN(L/I/V/M)XX**  
**(R/K)X{2,3}(D/E)X(2,3)Y**

**Motif 3**

|             |     |                                                              |
|-------------|-----|--------------------------------------------------------------|
| BnaMAPKKK18 | 104 | SYTRQIILLGLEYVHNSKRIAHCD-----VKGSNVLVGVNGEAKIADFGCAKR-       |
| BnaMAPKKK17 | 105 | KYTREMLRGLLEYIH-SRGVAHCD-----VKGSNVVVGEKGEAKIVDFGCAKR-       |
| BnaMAPKKK19 | 112 | RHTGSVLRGLRHH-AKGFHCD-----LKLGNILIFGDGAVKIADDFGLAKRA         |
| BnaMAPKKK20 | 110 | RHTGSVLRGLRHH-SRGFAHCD-----IKLENILIFGDGAVKIADDFGLAR--        |
| BnaMAPKKK3  | 305 | NYTRQILYGLAYLH-GRNTVHRD-----IKGANILVDPNGEIKLADDFGMAKH-       |
| NbMAPKKKα   | 311 | NYTRQILSGLSFLH-ARNTVHRD-----IKGANILVDPNGEIKLADDFGMAKH-       |
| BnaMAPKKK8  | 400 | TYTRQILDGLKYLH-DKGFTHRD-----IKCANILVDANGAVKLAADFGLAKV-       |
| AtMEKK1     | 435 | LYTRQILDGLKYLH-DKGFTHRD-----IKCANILVDANGAVKLAADFGLAKV-       |
| NbMAPKKKβ   | 392 | VYTRQILHGLKYLH-DRNVVHRD-----IKCANILVDANGSVKLAADFGLAKA-       |
| NbMAPKKKγ   | 451 | NFTRHILCGLAYLH-SKKTTHRD-----IKGANLLVDAYGVVKLAADFGMAKH-       |
| BnaMAPKKK6  | 721 | EMVHLADGMWQVFKLKRSTPRNDFCRIAANKGILRLRLINTLYSLNEATLLASEGRSGQ- |
| consensus   | 721 | ytrqil Gl ylh k vhrd ik aNilvdngn vkladflakr                 |

**Motif 4**  
**G(T/S)PX(F/Y/W)MAPEV**

|             |     |                                                               |
|-------------|-----|---------------------------------------------------------------|
| BnaMAPKKK18 | 151 | ---VEPELT-EPVRGTPAFMAPEVARGER-----QGKESDIWALGCTVIEMVTGSHPW    |
| BnaMAPKKK17 | 151 | ---VDPEVESEPVGTPAFMAPEVARGEK-----QGRESDIWAVGCTVIEMATGSPPW     |
| BnaMAPKKK19 | 159 | GEVTALMDGGVQIRGTPLYMAPESVNDNE-----YGSEADVWALGCVVEMFSGKTAW     |
| BnaMAPKKK20 | 155 | -DLTASKEG-VEIRGTPLYMAPESVNYNE-----YCAAADVWALGCVVEMFSGETAW     |
| BnaMAPKKK3  | 351 | ---VTAYSTMLSFTGSPYWMAPEVVMHKN-----GYTLAVDVWSVGCTILEMATAKPPW   |
| NbMAPKKKα   | 357 | ---TSSSLVLSFKGSPYWMAPEVVMNTS-----GYGLPVDIWSLGCALLEMASSKPPW    |
| BnaMAPKKK8  | 446 | ---SKLN-DIKSCKGTFFWMAPEVINPKRT---DGYGSSADIWSLGCCTVLEMLTGQIPY  |
| AtMEKK1     | 481 | ---SKFN-DIKSCKGTFFWMAPEVINRKDS---DGYGSPADIWSLGCCTVLEMLTGQIPY  |
| NbMAPKKKβ   | 438 | ---TKLN-DVKSCGTALWMAPEVNRKN-----QYGQAADIWSLGCCTVLEMLTRQFPY    |
| NbMAPKKKγ   | 497 | ---LNGQAANLSLKGSPYWMAPELLO SVMQKDSNSDLAFATDIWSLGCCTVIEMLNKPPW |
| BnaMAPKKK6  | 780 | ---LDQHEALLSVIDHPDVIKTRPGGGEPEP-----SNSQRSDLYQPDGDRPRSSAALDA  |
| consensus   | 781 | v msvrgrtp wmapevnn yg Diwslgctviem tg pw                     |

|             |     |                                                              |
|-------------|-----|--------------------------------------------------------------|
| BnaMAPKKK18 | 200 | TGGD T TDP-VSVLYRVGYMGETPELPSLS-----EQAKDFLGKCLRREAKERWRTAR  |
| BnaMAPKKK17 | 201 | TEASSGESSVSVLYRVGYSGEAPCLPCLLT-----EEAKDFLEKCFKREAKERWTAT    |
| BnaMAPKKK19 | 212 | SFKE-GSHFMSLLIRIGVGDLPRIPELDS-----EQGRDFLSKCFVKDPKKRWTAE     |
| BnaMAPKKK20 | 206 | SVEE-GSHFMSFLIRIGVGEELPRVPEELS-----EEGKDFLSKCFVKDPEKRWTV     |
| BnaMAPKKK3  | 402 | SQFEGVAAIFKIGNSK----DMPEIPDHLS-----NDAKNFIRLCLQRNPVTRPTAA    |
| NbMAPKKKα   | 408 | SQYEGVAAIFKIGNSK----DFPEIPDHLS-----NDAKNFIKLCLOREPSARPTAS    |
| BnaMAPKKK8  | 498 | CDLENPVQALYRIGRG----VLPDIPDTLS-----LDGRDFITECLKVDPEERPTAA    |
| AtMEKK1     | 533 | SDLE-PVQALFRIGRG----TLPEVPDTLS-----LDARLFILKCLKVNPEERPTAA    |
| NbMAPKKKβ   | 489 | SHLENQMQUALFRIGRG----EPPVPNTLS-----IDARNFINOCLQVDPSARPTAS    |
| NbMAPKKKγ   | 554 | SEYEAAAAMFVKLKDTE----PPIPETLS-----PEGKDFLRWCFCRNPAERPSAS     |
| BnaMAPKKK6  | 832 | IEDVKQHHRISISSNRTSTDKIQKLAESASNGYAVTQPEQVRPLLSLLEKETPSRHVSGQ |
| consensus   | 841 | s e v vl r elpelps es eakdfl cl rep rpta                     |

|             |     |                                                               |
|-------------|-----|---------------------------------------------------------------|
| BnaMAPKKK18 | 251 | QLLNHPFVITTKPNTPEFVTGLVTNSPTSVDQMFWRVSEEEEE-----DQERPSW       |
| BnaMAPKKK17 | 253 | QLLNHPFLITKPNTPE--VSGLVSSSPTSVIDQTFWTSGGEEEEETEELQEDSRNLDRLNL |
| BnaMAPKKK19 | 263 | MLLNHPFVAVDLDQDDLEGVD-IQLK-TEEVFASPRCPFEFSS-----WVSASCDSG     |
| BnaMAPKKK20 | 257 | MLLNHPFVAVDCEDDDDYQRDELCLKGGKDKVSKSPRCPFPGFPD-----WESMSSESE   |
| BnaMAPKKK3  | 450 | QLLEHPFLRVHSP-RVANTSMHKDVPPRPYDGS SSMPTREP-----PYSG---RHPVFH  |
| NbMAPKKKα   | 456 | QLLEHPFVKNQSTTKVTVHGVTKVTPRSFDGNRTPPVLDSSGRNISPTKGNVYASHPVIT  |
| BnaMAPKKK8  | 546 | ELLNHPFVRRPLAYSGSG-LGSASPHVHRRG-----                          |
| AtMEKK1     | 580 | ELLNHPFVRRPLPSVSGSGSGSASPLLR-----                             |
| NbMAPKKKβ   | 537 | QLLEHPFVKRTPS--SSGSASPQNLGKRL-----                            |
| NbMAPKKKγ   | 600 | MLLEHRFMRISHQPDVPSFLKPVGGVRIKEKLN SQ-----EQTTYN               |
| BnaMAPKKK6  | 892 | LDYVKHIAGLEKHESILPLLRSIDTMPRYFSKIMSKKVMAIEGAASASGVLSSGVLNA    |
| consensus   | 901 | llnhpfvr k t                                                  |

BnaMAPKKK18 301 WECHHEERIGGLSWIGQAVVDPTWDMGGEDWITVRRNN-----  
 BnaMAPKKK17 311 WACHSERIGRLRCVG-GLDGSRLDMEGGGWITVVRVSCETMIGGSHEENILEVGGTVN--  
 BnaMAPKKK19 313 TQYHTLEAPEERVATLAAGSIPDWSVTNNWVTVR-----  
 BnaMAPKKK20 309 IQYQPLDSPVERFASLVSESI PNWSVSEGWVTVR-----  
 BnaMAPKKK3 500 PIK--SPSRENVRAITSLPVS PCSSPLRQLGPAYKSCFLSPPHPSYAFPVQE-SGYNHQA  
 NbMAPKKKα 516 ISRPLSCP REIVK TITSLPVSPTSSPLRQYEPARRSCYLSPPHPAYGIGGHSYDENDYL  
 BnaMAPKKK8 -----  
 AtMEKK1 -----  
 NbMAPKKKβ -----  
 NbMAPKKKγ 642 LDQGRLSLER-----  
 BnaMAPKKK6 952 RLGSDTSSGLLSHMVTTL SAEVASQYLEKVADL LLEFARADTTVKS YMCSQSLLSRLFHM  
 consensus 961

BnaMAPKKK18 -----  
 BnaMAPKKK17 -----  
 BnaMAPKKK19 -----  
 BnaMAPKKK20 -----  
 BnaMAPKKK3 557 EFAASPFRFKKDTSLIEPSSYRAQAPSSPFRSRLV-----  
 NbMAPKKKα 576 MFQARPTTRNTLEPWLEI PQFKVQTPSRSPKLRPIL-----  
 BnaMAPKKK8 -----  
 AtMEKK1 -----  
 NbMAPKKKβ -----  
 NbMAPKKKγ -----  
 BnaMAPKKK6 1012 FNRVEPPILLKILKCTNHLSTDPNCLES LQRADAIKHLI PNLEVKEGNLVDQIHHEVLSA  
 consensus 1021

BnaMAPKKK18 -----  
 BnaMAPKKK17 -----  
 BnaMAPKKK19 -----  
 BnaMAPKKK20 -----  
 BnaMAPKKK3 -----  
 NbMAPKKKα -----  
 BnaMAPKKK8 -----  
 AtMEKK1 -----  
 NbMAPKKKβ -----  
 NbMAPKKKγ -----  
 BnaMAPKKK6 1072 LFNLC KINKRRQEQA AENGI I PHLMLFVMSDSPLKQYALPLLCDMAHASRNSREQLRSHG  
 consensus 1081

BnaMAPKKK18 -----  
 BnaMAPKKK17 -----  
 BnaMAPKKK19 -----  
 BnaMAPKKK20 -----  
 BnaMAPKKK3 -----  
 NbMAPKKKα -----  
 BnaMAPKKK8 -----  
 AtMEKK1 -----  
 NbMAPKKKβ -----  
 NbMAPKKKγ -----  
 BnaMAPKKK6 1132 GLDVYLSLLDDEYWSVIALDSIAVCLAQDNDNRKVEQALLKDDAIYTLVNFQSCPERHF  
 consensus 1141

BnaMAPKKK18 -----  
 BnaMAPKKK17 -----  
 BnaMAPKKK19 -----  
 BnaMAPKKK20 -----  
 BnaMAPKKK3 -----  
 NbMAPKKK $\alpha$  -----  
 BnaMAPKKK8 -----  
 AtMEKK1 -----  
 NbMAPKKK $\beta$  -----  
 NbMAPKKK $\gamma$  -----  
 BnaMAPKKK6 1192 VHILEPFLKIITKSSRINTTAVNGLTPLLIARLDHQDAIARLNLLKLIKAVYEHHPRPK  
 consensus 1201

BnaMAPKKK18 -----  
 BnaMAPKKK17 -----  
 BnaMAPKKK19 -----  
 BnaMAPKKK20 -----  
 BnaMAPKKK3 -----  
 NbMAPKKK $\alpha$  -----  
 BnaMAPKKK8 -----  
 AtMEKK1 -----  
 NbMAPKKK $\beta$  -----  
 NbMAPKKK $\gamma$  -----  
 BnaMAPKKK6 1252 QLIVENDLPQRLQNLIEERREGQHLGGQVLVKQMATSLLKALHINTVL  
 consensus 1261

## B

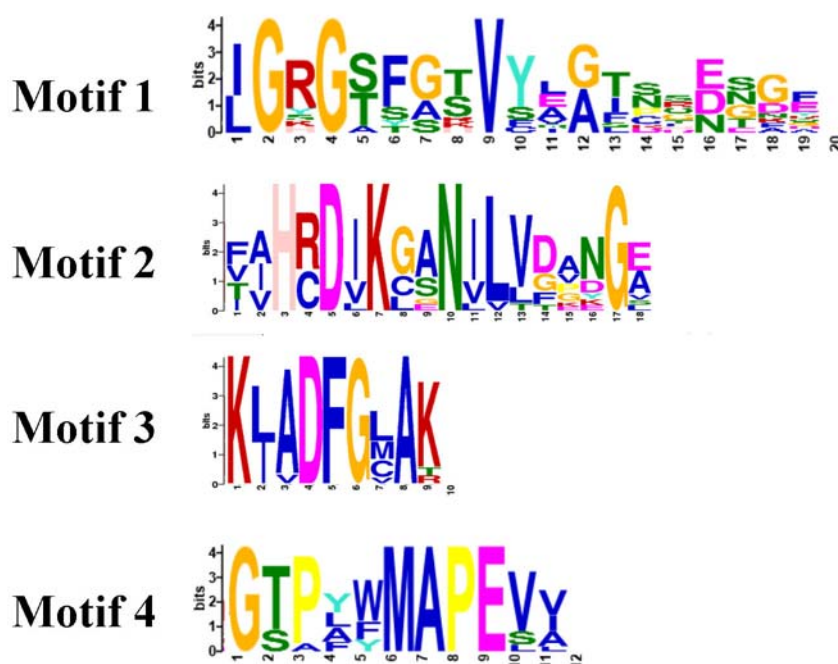

**Figure S2. Multiple alignment of MEKK-subfamily MAPKKK proteins in representative species and schematic diagram of four motifs of BnaMAPKKKs.** (A) Multiple alignment of MEKK-subfamily MAPKKK proteins in representative species. Multiple sequence alignment was performed using the ClustalX1.83 and illustrated by BOXSHADE ([http://www.ch.embnet.org/software/BOX\\_form.html](http://www.ch.embnet.org/software/BOX_form.html)). Identical amino acids are shaded in black,

and similar amino acids are shaded in gray. Four motifs were shown as overbars, which are motif 1 of Serine/Threonine protein kinases active-site signature, motif 2 of Protein kinases ATP-binding region signature, motif 3 of Tyrosine kinase phosphorylation site and motif 4 of G(T/S)PX(F/Y/W)MAPEV. (B) Schematic diagram of four motifs of BnaMAPKKKs. Motif analysis was determined by using MEME4.0 program as described in Materials and Methods section.



**A****Motif 1****Protein kinases ATP-binding region signature  
(L/I)GXG(A/S)(F/V/S)KXVXX(G/A)X(5-18)AVK**

I II

|            |   |                                                              |
|------------|---|--------------------------------------------------------------|
| BnaZIK4    | 1 | ----MDNNLVSYLEPDYSEFVEVDPTGRYGRYNEVLGKGASKTVYRAFDEYEGIEVAWNQ |
| AtZIK4     | 1 | ----MNN--LSYLEPDYSEFVEVDPTGRYGRYNEVLGKGASKTVYRAFDEYEGIEVAWNQ |
| BnaZIK9    | 1 | ---MMNN--ISHLESDDSEFVEVDPSGRYGRYNEVLGKGSSKTVYRGFDEYEGIEVAWNQ |
| AtZIK9     | 1 | ---MMNN--LSHLESDYSEYVEVDPTGRYGRYNEVLGKGSSKTVYRGFDEYEGIEVAWNQ |
| OsMAPKKK20 | 1 | ---MMGPKANAAAAGDLPEYAEVDPTGRYGRYNDVLGKGASKTVYRAFDEYEGIEVAWNQ |
| BnaZIK3    | 1 | ---MGNG--EESFVEDCSEYVEIDPSGRYGRYDEVLGKGASKTVYKAFDEYEGIEVAWNQ |
| AtZIK3     | 1 | ----MNG--EESFVEDCSVFVEIDPSGRYGRYDEILGKGASKTVYRAFDEYEGIEVAWNQ |
| BnaZIK2    | 1 | -----MVNMNQLSEYVETDPTGRYGRFEEVLGRGAMKTVFKAIIDEKLGIEVAWSQ     |
| BnaZIK8    | 1 | MVLPCASSESESLDKDSEPFVETDPTGRYGRYDEILGSGAVKKVYRAFDEYEGIEVAWNQ |
| BnaZIK6    | 1 | -MAFGS----SGTSEEEADFAKDPTGRYIRYHDVLGRGAFKTVYKAFDEVDGIEVAWNL  |
| AtZIK6     | 1 | -MASGSGFLGQISSMEEADFAEKDPSGRYIRYDDVLGRGAFKTVYKAFDEVDGIEVAWNL |
| AtZIK10    | 1 | -----MEEADFVQKDPTGRYIRYNDVLGRGAFKTVYKAFDEVEGIEVAWNL          |
| BnaZIK5    | 1 | --MDGAEDAAPIHEPPDPEVLEVDPTLRYIRYKEVIGKGAFKTVYKAFDEVDGIEVAWNQ |
| consensus  | 1 | d sefvevdPtgRYgRy evlGkGaskTcVyrafDeyeGiEVAWnq               |

|            |    |                                                               |
|------------|----|---------------------------------------------------------------|
| BnaZIK4    | 57 | VKLYDFLQSPEDLERLYCEIHLKTLKHKNIMKFYTSWVDTSNRNINNFVTELFSTGTLRQ  |
| AtZIK4     | 55 | VKLYDFLQSPEDLERLYCEIHLKTLKHKNIMKFYTSWVDTSNRNINNFVTELFSTGTLRQ  |
| BnaZIK9    | 56 | VKLYDFLQSPQELERLYCEIHLKTLKHKSIMKFYTSWVDTDNRNINNFITEMFTSGTLRQ  |
| AtZIK9     | 56 | VKLYDFLQSPQELERLYCEIHLKTLKHKSIMKFYASWVDTDNRNINNFVTEMFSTGTLRQ  |
| OsMAPKKK20 | 58 | VKLHDFLQSPEDLERLYCEIHLKTLKHNRNIMKFYTSWVDVSRNINNFITEMFTSGTLRQ  |
| BnaZIK3    | 56 | VKLRNFTRNPEELEKFFREIHLKTLNHQNIIMKFYTSWVDTNLAINFVTELFSTGTLRQ   |
| AtZIK3     | 55 | VKLRNFTRNPEELEKFFREIHLKTLNHQNIIMKFYTSWVDTNLAINFVTELFSTGTLRQ   |
| BnaZIK2    | 51 | VKLKEVLRSSVDLQRLYSEVHLIISTLNHKSITRFYTSWIDVDSHTINFITELFSTGTLRQ |
| BnaZIK8    | 61 | VKLRCFSDDAAMLERLYSEVRLKSLKNTNIIALYKVRDRSNTINFITEICTSGNLRRE    |
| BnaZIK6    | 56 | VSTEDVMQMPGQLERLYSEVHLLKALKHENI IKLFNSWVDEKNTINMITELFSTGSLRL  |
| AtZIK6     | 60 | VSTEDVMQMPGQLERLYSEVHLLKALKHENI IKLFYSWVDEKNTINMITELFSTGSLRV  |
| AtZIK10    | 47 | MSIEDVLQMPGQLDRLYSEVHLLNSLKHNDNI IKLFYSWVDDHNKSNMITELFSTGSLTL |
| BnaZIK5    | 59 | VRIDDVLQSPNSLERLYSEVRLKSLKHSNIIRFYNSWIDDKNKTVNIITELFTSGSLRH   |
| consensus  | 61 | vkl dflqsp dLerly EihLLktLkh nImkfytsWvD nrSiNfiTElftSGtLrQ   |

**Motif 2****Motif 3****Serine/Threonine protein kinases active-site signature  
[LIVMFYC]X[HY]XD[LIVMFY]KXXN[LIVMFYCT]XXX**

|            |     |                                                               |
|------------|-----|---------------------------------------------------------------|
| BnaZIK4    | 117 | YRLRHKRVNIRAVKHWCRQILRGLHYLHNHDPPVIHRDLKCDNIFVNGNQGEVKIGDLGL  |
| AtZIK4     | 115 | YRLRHKRVNIRAMKHWCRQILRGLHYLHSHDPPVIHRDLKCDNIFVNGNQGEVKIGDLGL  |
| BnaZIK9    | 116 | YRLKHKRVNIRAVKHWCRQILRGLDYLHTDPPVIHRDLKCDNIFVNGNQGEVKIGDLGL   |
| AtZIK9     | 116 | YRLKHKRVNIRAVKNWCRQILRGLNYLHTDPPVIHRDLKCDNIFVNGNQGEVKIGDLGL   |
| OsMAPKKK20 | 118 | YRQKHMRVNIWAVKHWCRQILSGLLYLHSHDPPVIHRDLKCDNIFVNGNQGEVKIGDLGL  |
| BnaZIK3    | 116 | YRLRHRRVNIKAVKQWCKQILKGLLYLHSCSPPIIHRDLKCDNIFVNGNQGEVKIGDLGL  |
| AtZIK3     | 115 | YRLRHRRVNIKAVKQWCKQILKGLLYLHRSPPPIIHRDLKCDNIFVNGNQGEVKIGDLGL  |
| BnaZIK2    | 111 | YKPKYMRIDIRAIKSWARQILEGLVYLHEHDPPVIHRDLKCDNIFVNGHLCQVVKIGDLGL |
| BnaZIK8    | 121 | YRKKHRHVSMRALKKWSKQILKGLVYLHTDPPVIHRDLKCDNIFVNGNIGQVVKIGDLGL  |
| BnaZIK6    | 116 | YRKKHRKVDPKAIKNWARQILKGLTYLHSAKPPVIHRDLKCDNIFVNGNTGEIKIGDLGL  |
| AtZIK6     | 120 | YRKKHRKVDPKAIKNWARQILKGLNYLHSAQPPVIHRDLKCDNIFVNGNTGEVKIGDLGL  |
| AtZIK10    | 107 | YRKKHRKVDPKAIMNWARQILKGLHYLHSAQPPVIHRDLKCDNIFVNGNTGKVKIGDLGL  |
| BnaZIK5    | 119 | YRKKHRKVMKAVKQWARQILMGLRYLHTQVPPVIHRDLKCDNIFVNGNHGEVKIGDLGL   |
| consensus  | 121 | Yr khrrvnirAvk WcrQILrGL YLHshdPpVIHRDLkCdNiFvNgNqGevKIGDLGL  |

### Motif 3

#### Tyrosine kinase phosphorylation site

[R/K]X{2,3}[D/E]X{2,3}Y

### Motif 4

GTPEFMAPE(L/V/M)(Y/F/L)

|           |     |                  |                |
|-----------|-----|------------------|----------------|
| BnaZIK4   | 177 | AATLRKSHAAHCVG   | TPEFMAPEVYEEAY |
| AtZIK4    | 175 | AATLRKSHAAHCVG   | TPEFMAPEVYEEAY |
| BnaZIK9   | 176 | AAMLOHSHAAHCVG   | TPEFMAPEVYAEAY |
| AtZIK9    | 176 | AAALOHSAAHCVG    | TPEFMAPEVYKEAY |
| OsmAPK20  | 178 | AATLRKSHAVHCVG   | TPEFMAPEVYEEAY |
| BnaZIK3   | 176 | AATLRKSHAVRCVG   | TPEFMAPEVYDEAY |
| AtZIK3    | 175 | AATLRKSHAVRCVGT  | TPEFMAPEVYDEAY |
| BnaZIK2   | 171 | ARMLRDCRSASVILG  | TPEFMAPELFEGNY |
| BnaZIK8   | 181 | AAVVGKNEHLASVILG | TPEFMAPELYEEAY |
| BnaZIK6   | 176 | ATVILQOPTARSVIG  | TPEFMAPELYEEAY |
| AtZIK6    | 180 | ATVILQOPTARSVIG  | TPEFMAPELYEEAY |
| AtZIK10   | 167 | AAVMQOPTARSVIG   | TPEFMAPELYEEAY |
| BnaZIK5   | 179 | ATVMEQAHAHSVIG   | TPEFMAPELYDEAY |
| consensus | 181 | Aail ksha hcvg   | TPEFMAPEvyeey  |

|           |     |                                                                  |
|-----------|-----|------------------------------------------------------------------|
| BnaZIK4   | 205 | NELVDIYSFGMCILEMVTFDYPYSECTHPAQIYKKVMSGKKPDALYMKVDPEVKYFIEKC     |
| AtZIK4    | 203 | NELVDIYSFGMCILEMVTFDYPYSECTHPAQIYKKVMSGKKPDALYKVKDPEVKCFIEKC     |
| BnaZIK9   | 204 | NELVDIYSFGMVCILEMVTFDYPYSECTHPAQIYKRVISGKKPDSLDKVKDSEVGRGFIEKC   |
| AtZIK9    | 204 | NQLVDIYSFGMVCILEMVTFDYPYSECTHPAQIYKRVISGKKPDGLDKVKDPEVGRGFIEKC   |
| OsmAPK20  | 206 | NELVDIYSFGMVCILEMVTFEYPYSECTHPVQIYKKVISGTPKPEALYKVKDPMVROFVIEKC  |
| BnaZIK3   | 204 | NELVDVYAFGMVCILEMVTFDYPYSECTHPAQIYKKVITSGKKPEAFYLVKVDPEVREFVIEKC |
| AtZIK3    | 235 | NELVDVYAFGMVCILEMVTFDYPYSECTHPAQIYKKVITSGKKPEAFYLVKVDPEVREFVIEKC |
| BnaZIK2   | 200 | NELIDVYSFGMCILEMTSEFPYSECNSPVHIYKKVSSGKLPFAFYRVEDIEAQIFIRKC      |
| BnaZIK8   | 210 | TELIDVYSYFGMVCILETVSLEIPYSECDSVAKIYRKVSSGVKPEALNKVKDLEAKAFIEKC   |
| BnaZIK6   | 204 | TELVDIYSFGMCMILEMVTCEYPYNECRNQAQIYKKVITSGIKPQSLSRVDDPQVROFIEKC   |
| AtZIK6    | 208 | NELVDIYSFGMCMILEMVTCEYPYNECRNQAQIYKKVITSGIKPQSLGKVDVDPQVROFIEKC  |
| AtZIK10   | 195 | NELVDIYSFGMCMILEMVTCEYPYRECRNQAQIYKKVITSGIKPQSLSKVDVDPQVROFIEKC  |
| BnaZIK5   | 207 | TELAIDIYSFGMCMILEMVTFEYPYCECRNSAQIYKKVSSGIKPAASLSRVQDPEVKQFIEKC  |
| consensus | 241 | neLvDiYsfGMcILemvtfeyPYsECthpaqIYkkVtSgkkPdAl kVkdpevr FieKc     |

|           |     |                                                               |
|-----------|-----|---------------------------------------------------------------|
| BnaZIK4   | 265 | LATVSLRVSARELLDDPFLRIDDGEFDLRSVDVDYVMPPLVLRQPHHLLADYNNYPSNSS  |
| AtZIK4    | 263 | LATVSLRVSARELLDDPFLRIDDGEFDLRSVDMEDSVG-PLYRQP-HHLPDYNNYPSNSS  |
| BnaZIK9   | 264 | LASASLRVSARELLDDQFLCID-----YPSNYY                             |
| AtZIK9    | 264 | LATVSLRVSARELLDDHFLCIDES--DMRRVESEKGLI-DEAGTPLRHSYHIPHYSNGYY  |
| OsmAPK20  | 266 | LATASRRVSARELLKDPFLQVDDLVFVCPG--DGDYSLMNYLRQPYLEHAYSNVSMMSNGL |
| BnaZIK3   | 264 | LATVTSRLTARELLQDPFLQDD-----VDEFDMRPIDYNGYD                    |
| AtZIK3    | 295 | LANVTCLTARELLQDPFLQDDN-----MDGFVMRPIDYNGYD                    |
| BnaZIK2   | 260 | LVPASQRVSARELLQDPFLSSDE-----SWMVYARGAG                        |
| BnaZIK8   | 270 | LAPKLRVSARELLRDPFLFDGIVD-----                                 |
| BnaZIK6   | 264 | LLPASESRPKALELSMDPFLARDGS-----KDSAPLLASSSTAS----              |
| AtZIK6    | 268 | LLPASSRPTALELSKDPFLARDGG-----KDSALLASSSTSSKYV----             |
| AtZIK10   | 255 | LLPAPSRPTALELLKQQLLAVDGA-----KDSTLTASSNTTFKPA----             |
| BnaZIK5   | 267 | LLPASERLSARELLLDPFLOVNGL-----TMNPLPLPDIVMPKEGAFG              |
| consensus | 301 | la as RvsA ELl Dpfl id y                                      |

|           |     |                                                              |
|-----------|-----|--------------------------------------------------------------|
| BnaZIK4   | 325 | SLNRQYSNG-----YHEYQNRWAYNPGETEETHGIELFEICRNEN--              |
| AtZIK4    | 321 | SLNRQYSNGNYPSNSSSLNRQYSNGYNSHHEYQNGWAYNPAETEETHGIELFESRNND-- |
| BnaZIK9   | 292 | SDN-----DQSQWYNGDEMIESHGIEIFEFQNEDDH                         |
| AtZIK9    | 321 | SLY-----NQNQWDYNGDETVESHEIDLLEFQND--                         |
| OsmAPK20  | 324 | SESIDEDTP-----TEDRWDC-DDDIKADGIDLFN-----                     |
| BnaZIK3   | 302 | E---FLRQP-----LIDPPLYHDES---QICEIDLFAQ-----                  |
| AtZIK3    | 334 | ETGVFLRHP-----LIDDPPLYHDQFESSQICEIDLFAN-----                 |
| BnaZIK2   | 293 | NLKPFLNEN-----EMDRLLKL-----                                  |
| BnaZIK8   | 294 | -----                                                        |
| BnaZIK6   | 302 | KPPQPEHLP-----MDVDHHHNENKSVSVSSSRKSNNGESYPW                  |
| AtZIK6    | 308 | RPPQLEHLP-----MDVD--HNENKSVSSN-----EDYPW                     |
| AtZIK10   | 295 | MPPQCEYRP-----MDVEYKNTSVSICSSAK----SSQECAL                   |
| BnaZIK5   | 311 | ERCLMSEGP-----PATRPSKPTSMDLDESDNLPIVTFSDNSG                  |
| consensus | 361 | p n ti iel                                                   |

AD

BnaZIK4 364 --DQ**EEDKSSGNVDISIKGKR**RDDG-GL**FLRLRI**TDKE-----  
 AtZIK4 379 --DQ**EEEKKSGNVDITIKGKR**RDDG-GL**FLRLRI**ADKE-----  
 BnaZIK9 324 **EEAE**EYDN**KFN**VHISIKGKR**R**NGDGL**FLRLRI**ADKE-----  
 AtZIK9 351 -DE**EEEDK**RFGSV**DISIKGKR**RNGDGL**FLRL**KT**VN**KE-----  
 OsMAPKKK20 354 ---G**HEDE**PLGNVDITIK**GKRS**EDG-S**IFLRLRI**ADND-----  
 BnaZIK3 329 ----D**DEEDS**DHVDISIKGKR**NGSD**-G**IFLRLRI**SDAE-----  
 AtZIK3 367 ----D**DE**---D**HVD**ISIKGKR**NGDD**-G**IFLRLRI**SDAEGIVS**IFFDSFKI**IGLKNV**TRFR**  
 BnaZIK2 309 ----E**DELGR**TQ**MTIT**GR**LKA**EDNT**ITL**EV**II**ADEN-----  
 BnaZIK8 294 ----E**EEEE**NN**NGGT**GRVVS-----  
 BnaZIK6 340 CQTIG**LQRF**A**EDKE**FRL**RGERS**DDA-TAS**MLLRIG**DSS-----  
 AtZIK6 336 SQT**TELQ**RIA**ENKE**FRL**RGERS**DDV-TAS**MVLRI**ADPS-----  
 AtZIK10 329 LQ**TM**EV**Q**VA**EST**E**FKLS**G**ERR**DDV-AAS**MALRI**AGSS-----  
 BnaZIK5 349 SRC**TE**V**RA**K**RGN**FFV**LKGE**ENDE**Q**-S**SLILRI**V**DN**-----  
 consensus 421 eedk d vdisikGkr dd glflrlriad e

BnaZIK4 399 ----G**RV**RNIY**FPFDI**ETD**TAL**SVATE**MVAEL**DMDDHG**VTKIAN**MID**GEIS**RLVPS**WRP**  
 AtZIK4 414 ----G**RV**RNIY**FPFDI**ETD**TAL**SVATE**MVAEL**DMDDHG**VTKIAN**MID**GEIS**SSLVPS**WRP**  
 BnaZIK9 362 ----G**L**VRNIY**FPFDI**ESD**TAL**SVARE**MVEE**LEMDD**RDVTKIAN**MID**GEIAS**LV**PR**WRS  
 AtZIK9 388 ----G**C**VRNIY**FPFDI**ETD**TAL**SVARE**MVEE**LEMDD**RDVTKIAN**MID**GEIAS**LV**PN**WS-  
 OsMAPKKK20 388 ----G**H**VRNIY**FPFDI**E**AD**TALSVATE**MVAEL**DITD**HEV**TRIAEMID**GEV**SALV**PD**WRP  
 BnaZIK3 362 ----G**R**IRNIY**FPFET**E**TD**AWSVA**EMV**SELDIT**NQDVAKIA**EMID**AEIA**ALV**PD**WKV  
 AtZIK3 419 VLG**NVGR**IRNIY**FPFET**A**TD**AWSVA**EMV**SELDIT**NQDVAKIA**EMID**AEIA**ALV**PD**WKV  
 BnaZIK2 342 ----G**MA**KK**VAF**PF**G**IT**MND**TSVD**VAM**EM**VKE**LEITD**WDP**VE**IA**EMID**GEIS**SLV**PG**WRY  
 BnaZIK8 -----  
 BnaZIK6 377 ----G**K**GRIV**HFA**Y**LNS**DTATA**AE**EM**VEE**L**H**LTSQ**EV**VI**AD**MID**DL**IM**QL**H**SER**SS  
 AtZIK6 373 ----G**K**CRIV**HFA**Y**LES**DTATA**AE**EM**VEE**L**H**LTSQ**EV**V**VI**AD**MID**DF**IM**QL**LS**DR-T  
 AtZIK10 366 ----G**Q**ARK**VDE**FD**EN**L**K**DTAR**AVT**G**EM**VE**ELD**LS**SHE**VT**VIA**EMID**EL**IM**KL**KANR--  
 BnaZIK5 386 ----G**RV**RNI**H**EL**F**Y**Q**E**G**DT**ASK**V**SSE**M**VE**Q**LE**ITD**Q**NV**TF**IA**EL**ID**IL**LV**N**MI**PT**W**K**T  
 consensus 481 grvrniyfpfdietdta sva emv eldmt dvtkiaemidgei lvp wr

BnaZIK4 454 G**PE**F**EES**LAAAAAAAAANAN**IC**SN**CV**SN**RT**SM**G**S**V**MD**FL**RT**NP**GAN**V**A**Q**CC**R**NG**CG**E**TH**GR  
 AtZIK4 469 G**PE**F**E**E**CL**AAAAAAAA**NA**AS-**IC**NC**NC**SV**NR**TS**MG**S**V**MD**FL**RT**NP**GAN**VI**Q**CC**RNG**CG**E**TH**GR  
 BnaZIK9 417 G**L**G**F**ES**SF**-----**CN**CAS**NR**SA**V**DFN-----**VR**Q**CC**R**NM**CG**E**K**H**GR  
 AtZIK9 442 --**I**F**C**S**S**E-----**SN**R**S**SV**G**S**V**MD**FN**-----**EM**Q**CG**R**D**G**CE**E**K**HGR  
 OsMAPKKK20 443 G**P**G**I**E**S**S**Q**-----**DT**TY**CH**NC**GS**NV**S**SC**G**S**LY**AY**MS**-----**SA**ARG**CQ**CA**EL**HGR  
 BnaZIK3 417 N**NN**-----**VS**NS**N**KE**EE**K**S**H  
 AtZIK3 479 D**T**ESS**Q**NV-----**NN**N**K**NN**N**AG**FC**G**E**CAS**NG**Y**I**Q**ET**V**S**S**G**---**E**K**S**H  
 BnaZIK2 397 E**E**G**D**ET**PH**-----**VY**H**S**SS**S**Q**AS**FS**N**-----**YM**TR**GR**Q**D**W**Q**DD  
 BnaZIK8 -----  
 BnaZIK6 432 S**SH**PN**Q**TS-----**PH**LAV**R**ED**H**HE**AA**  
 AtZIK6 427 S**SH**HN**Q**NS-----**PR**L**TH**--**E**D**H**E**AA**  
 AtZIK10 419 -**S**LP**N**ANS-----**VY**Q**S**K---**D**E**E**A**G**  
 BnaZIK5 441 D**V**T**V**D**H**LI-----**HS**QL**N**Q**SS**R**S**H**Q**N  
 consensus 541 s e hgr

BnaZIK4 514 F**E**E**I**T**I**R**E**T**E**V**R**L**R**E**I**W**K**L**Q**Q**Q**ES**R**EL**SS**I**D**SG**Q**NH**S**EEEEEE--**VY**ED**PE**IT**F**S**C**EAS  
 AtZIK4 528 F**E**E**I**T**I**R**E**T**E**V**R**L**R**E**L**W**K**L**Q**Q**Q**ES**R**EL**SS**I**D**SG**H**NH**S**EEEEEE**EV**LY**ED**P**EN**M**F**S**C**EAG  
 BnaZIK9 453 F**E**E**I**T**S**G**V**N**N**S**D**EE**EV**F**S**CR**S****S**D-----  
 AtZIK9 476 F**E**E**I**T**F**E**I**T**V**N**D**S**D**E**E**D-----  
 OsMAPKKK20 488 F**E**E**I**T**F**Q**A**NG**E**Q**T**D**L**Q**D**SG**G**S**S**DD**G**GG**Q**T**Q**H**V**K**D**Q**E**AV**H**S**NG**F**V**Q**M**G**R**R**G**PR**D**Q**F**C**F**SS**F**  
 BnaZIK3 432 H**Y**H**H**Q**F**E**C**S**D**DR**SC**SS**V**H**G**R**F**E**E**I**S**Y**Q**A**E**G**Q**E**Q**GS--**GD**V**V**V**S**G**E**G--**NN**N**R**I**H**Y**A**D**I**W**G**  
 AtZIK3 519 H**N**H**H**E**F**D**S**SE**D**K**SC**SS**V**H**G**-----**RF**AD**M**W**G**  
 BnaZIK2 432 L**H**DE**T**H**S**Q**S**S**Y**SS**G**LS**N**LN**Y**Y**V**D**EN**SS**Q**PP**AV**NR**TH**N**V**TR**FR**PE**ES**Y**H**V**R**S**G**KAN**M**HA  
 BnaZIK8 -----  
 BnaZIK6 453 N**Q**L**T**AN**S**K**D**E---**ES**M**K**S**G**I**S**T**D**Y**L**P**F**SS**NG**S---**AG**Q**E**A**E**S--**M**S**S**F**L**D**S**C**M**M**S**T  
 AtZIK6 446 N**Q**Q**T**V**N**S**K**D**E**E**A**AG**Q**S**M**K**S**D**I**S**A**D**Y**F**P**Y**S**AN**D**G**N**A**E**AG**R**D**A**E**S**--**M**S**S**Y**L**D**S**C**M**M**S**T  
 AtZIK10 436 ---**ES**M**K****S**E**I**S**A**D**Y**H**R**V**S**S**N**E**G**S**R**L**G**C**C**E**A**V**S**LL**S**S**F**L**D**S**C**M**V**S**N**  
 BnaZIK5 462 E**A**K**P**Q**S**Q**E**E**S**T**F**H**D**A**C**E**S**VR**H**S**W**T**S**D**C**PR**S**EEEE**K**Q**F**V**D**A**I**K**G**E**NG**S**D**N**Q**E**A**E**E**A**T**E**P**V**S**  
 consensus 601 k s

BnaZIK4 572 N----TLNHLTGSGSFSF**l**PSLYCDEV-EKT**e**DQVQ**e**FRWLK**ak**QCQMDIREMHDEQLKS  
 AtZIK4 588 N----EINHISGSGSFSF**l**MPSKYCDEPSEKT**e**NQVQ**e**ELRWL**ak**KACQIELRDIQDEQLKT  
 BnaZIK9 -----  
 AtZIK9 -----  
 OsMAPKKK20 548 QEQSCSPRHYEYDTS**l**LQAKGFD**l**MKHEVKMAKYKARKMAHLRRA**l**HP**l**SLDFDNLNGERRMK  
 BnaZIK3 489 LRDSRSDGGEEEEES--S**l**KPRRKVEGEW**l**WP**e**NEIR**e**ELRWL**ak**KARHKRVRDHQT-----  
 AtZIK3 545 LRESYSDDG**e**K-----QSSRKVRSGRWS**e**NEMR**e**ELRWL**ak**KARHKIQLMKMRGQTICE  
 BnaZIK2 492 ASSSSNLRQASDNRTLPRN**l**RS**l**AD**l**VQ**l**QL**l**QR**l**SLTEARIR**l**RL**l**RT**l**VG**l**DVEAVGFQPPYA  
 BnaZIK8 -----  
 BnaZIK6 503 LY---ISDNEY**l**PDDLK**l**TEL**l**N**l**MIESQYNQSVQ**l**DL**l**L**l**K**l**L**l**KE**l**DAVEN**l**AK**l**RKWIMKKQKGL----  
 AtZIK6 505 IYNLSISDNDYPEDL**l**K**l**TEL**l**N**l**LIESQFNQSFQ**l**DL**l**L**l**K**l**L**l**KE**l**DAIEN**l**AK**l**RKWITKKQKAVNIS-  
 AtZIK10 482 KQ-----SEDLK**l**TEL**l**N**l**VIESQYNQSC**l**Q**l**RL**l**LM**l**KE**l**E**l**AIE**l**K**l**AK**l**RKW**l**MS-----  
 BnaZIK5 522 LE-----EEER**l**LRQ**l**E**l**EEIEAKYQ**l**E**l**EM**l**KE**l**I**l**AK**l**RE**l**E**l**AIM**l**ET**l**K**l**R**l**KS**l**Q**l**KK**l**VEQ**l**AG---  
 consensus 661 1 e e ak

BnaZIK4 627 MWSETGEE---GLKDGFSG---SVSGLGRGGD-EDKVF-----  
 AtZIK4 644 RWPESGEEVEISPKD**l**G**l**FLG---SVSGLGREEDTVKEMF-----  
 BnaZIK9 -----  
 AtZIK9 -----  
 OsMAPKKK20 608 SSLNKLQSFHIGKNH**l**FR**l**IP**l**TCERSPGARDAEED**l**PD**l**IF**l**N**l**LAYHSR**l**HP**l**D**l**PGA**l**QRARHCEVD  
 BnaZIK3 541 -----ICEKPSSASP-----  
 AtZIK3 597 TP**l**IEIS**l**TPG**l**TSV**l**SL-----  
 BnaZIK2 552 VSRKPPSSRR-----  
 BnaZIK8 -----  
 BnaZIK6 -----  
 AtZIK6 -----  
 AtZIK10 -----  
 BnaZIK5 -----  
 consensus 721

BnaZIK4 658 -----GGRSVPK**l**CL**l**K**l**RT**l**TS**l**LP**l**V**l**DA**l**IES  
 AtZIK4 679 -----GERLVPK**l**CL**l**K**l**RT**l**TS**l**LP**l**V**l**DA**l**IDS  
 BnaZIK9 -----  
 AtZIK9 -----  
 OsMAPKKK20 668 AQSS**l**PD**l**LM**l**FT**l**ARS**l**YY**l**TGA**l**QL**l**PT**l**N**l**L**l**PR**l**TK**l**SV**l**TL**l**NA**l**V**l**DA  
 BnaZIK3 551 -----PL**l**LY**l**RA**l**IS**l**LP**l**V**l**DA**l**V**l**DI  
 AtZIK3 612 -----PL**l**LY**l**RA**l**IS**l**LP**l**V**l**DA**l**V**l**DM  
 BnaZIK2 -----  
 BnaZIK8 -----  
 BnaZIK6 -----  
 AtZIK6 -----  
 AtZIK10 -----  
 BnaZIK5 -----  
 consensus 781

**B**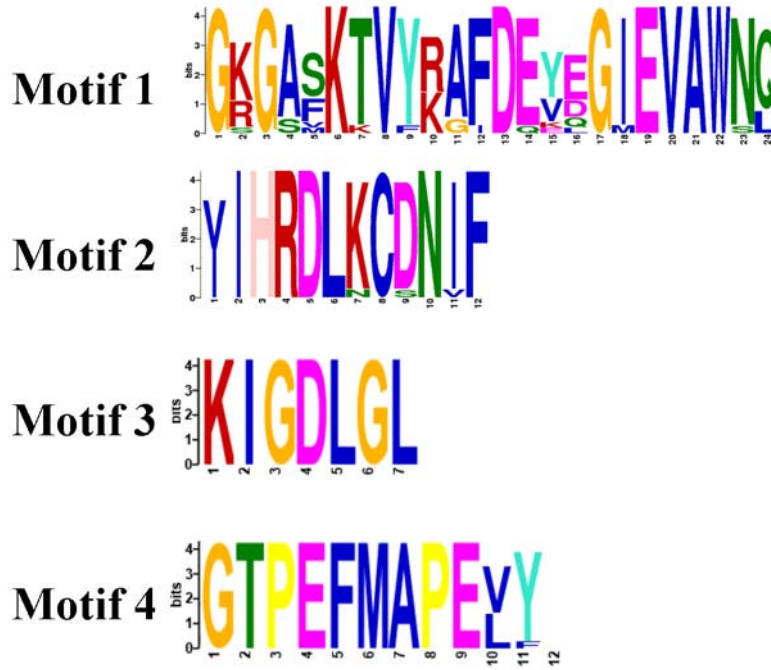**C**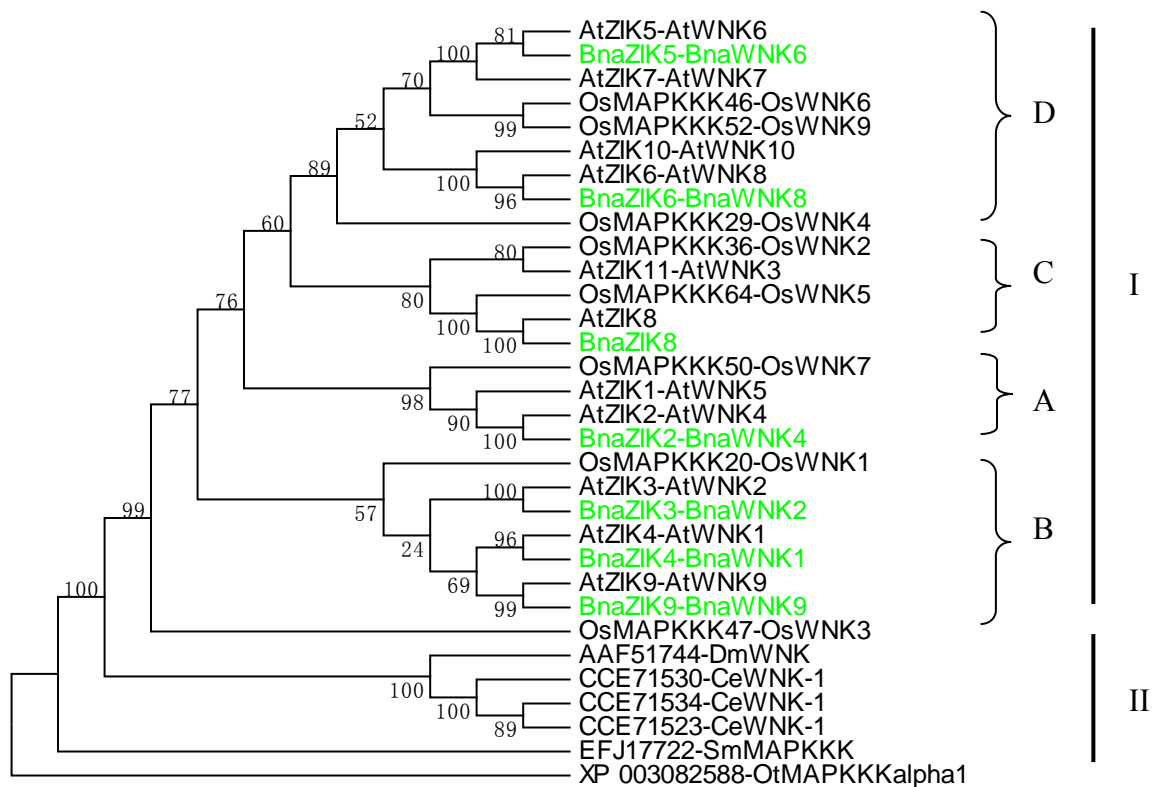

**Figure S3. Multiple alignment of ZIK-subfamily MAPKKK proteins in representative species, schematic diagram of four motifs of BnaZIKs, and phylogenetic analysis of ZIKs (WNKs) in representative species.** (A) Multiple alignment of ZIK-subfamily MAPKKK proteins in representative species. Multiple sequence alignment was performed using the ClustalX1.83 and illustrated by BOXSHADE ([http://www.ch.embnet.org/software/BOX\\_form.html](http://www.ch.embnet.org/software/BOX_form.html)). Identical amino acids are shaded in black, and similar amino acids are shaded in gray. Four motifs were shown as

overbars, which are motif 1 of Serine/Threonine protein kinases active-site signature, motif 2 of Protein kinases ATP-binding region signature, motif 3 of Tyrosine kinase phosphorylation site and motif 4 of G(T/S)PX(F/Y/W)MAPEV. The Subdomain I and II, as well as the autoinhibitory domain (AD) are indicated as above. The Lysine (K) residue in subdomain I and asparagine or serine in the serine/threonine protein kinase active-site signature was highlighted above. (B) Schematic diagram of four motifs of BnaZIKs. Motif analysis was determined by using MEME4.0 program as described in Methods. (C) Phylogenetic analysis of ZIKs (WNKs) in representative species. The phylogenetic tree was inferred using the maximum parsimony method of MEGA5.1 program. For clarity of presentation, the respective ZIK proteins are depicted by a two to three-letter code denoting the species in combination with numbers, locus ID or GenBank accession numbers representing the exact member from that species. A ZIK from the marine green alga *Ostreococcus tauri* (*Ot*) was used to root the tree. The ZIK proteins from animals form a distinct group (II) while those from plant species can be divided into four major subgroups (IA to ID), as supported by highly significant bootstrap values. The green highlighted proteins are from canola. The analysis involved 32 amino acid sequences. There are a total of 254 positions in the final dataset. The numbers on the nodes are percentages from a bootstrap analysis of 500 replicates. *A. thaliana* (*At*), *B. napus* (*Bna*), *O. sativa* (*Os*), *Selaginella moellendorffii* (*Sm*), *Ostreococcus tauri* (*Ot*), *Drosophila melanogaster* (*Dm*) and *Caenorhabditis elegans* (*Ce*).

# A

|               |   |                                                             |
|---------------|---|-------------------------------------------------------------|
| BnaCTR1       | 1 | -----MEMPGARRSNYTLLSQFPDDQVSVSVTGAPPPHYDSSL                 |
| AtCTR1        | 1 | -----MEMPGARRSNYTLLSQFPDDQVSVSVTGAPPPHYDSSL                 |
| OsmAPK6-DSM1  | 1 | -----MKNFFRKLHIGEGSGDGASSSPPPSSSRKGS                        |
| AtEDR1        | 1 | -----MKHIFK---KLHRGGNQEQNRNTDA                              |
| OsmAPK1-EDR1  | 1 | -----MKNLFKSKIKWQHRSNDPASSQGGQ                              |
| BnaRaf33      | 1 | -----                                                       |
| BnaRaf39      | 1 | -----                                                       |
| BnaRaf36      | 1 | -----                                                       |
| BnaRaf22      | 1 | -----                                                       |
| BnaRaf28      | 1 | -----                                                       |
| BnaRaf34      | 1 | -----                                                       |
| BnaRaf41      | 1 | -----                                                       |
| BnaRaf37      | 1 | -----                                                       |
| BnaRaf21      | 1 | -----                                                       |
| BnaRaf29      | 1 | -----                                                       |
| BnaRaf30      | 1 | -----                                                       |
| OsmAPK43-ILA1 | 1 | -----                                                       |
| BnaRaf17      | 1 | -----                                                       |
| BnaRaf23      | 1 | -----                                                       |
| BnaRaf46      | 1 | -----                                                       |
| BnaRaf27      | 1 | -----                                                       |
| BnaRaf35      | 1 | MCSSNRVIRFAMDSGSVNSSSVTSPGSSLNDEPHRVKFLCSFLGSILPRPQDGKLRVVG |
| consensus     | 1 |                                                             |

|               |    |                                                              |
|---------------|----|--------------------------------------------------------------|
| BnaCTR1       | 40 | -SASNNNSGNGKSKS---GFDWDHHPGGGGDHRP---PNRAG-NMYSSSLGLQRQSSG   |
| AtCTR1        | 39 | ENRSNHNSGNTGKAKAERGGFDWDPS-GGGGDHRLNNQPNRVGNMYASSLGLQRQSSG   |
| OsmAPK6-DSM1  | 33 | GGVGGNHHLHAEQRQPSASAVSSWLDVPGRPQPTPSTPSEAEQSPFSSSVGSGAEERR   |
| AtEDR1        | 24 | APPSDQNRHVSANPPQ-----ATPSSVTETLPVAGATSSMASPAP---TAASNADYM    |
| OsmAPK1-EDR1  | 27 | GLPQRRRRRHRRRAPRRGGRLRYPCRRYRRRPLPPRRRRRGLAAAGPGGGGGGTGGEDYM |
| BnaRaf33      | 1  | -----                                                        |
| BnaRaf39      | 1  | -----                                                        |
| BnaRaf36      | 1  | -----                                                        |
| BnaRaf22      | 1  | -----                                                        |
| BnaRaf28      | 1  | -----                                                        |
| BnaRaf34      | 1  | -----                                                        |
| BnaRaf41      | 1  | -----                                                        |
| BnaRaf37      | 1  | -----                                                        |
| BnaRaf21      | 1  | -----                                                        |
| BnaRaf29      | 1  | -----                                                        |
| BnaRaf30      | 1  | -----                                                        |
| OsmAPK43-ILA1 | 1  | -----                                                        |
| BnaRaf17      | 1  | -----                                                        |
| BnaRaf23      | 1  | -----                                                        |
| BnaRaf46      | 1  | -----                                                        |
| BnaRaf27      | 1  | -----                                                        |
| BnaRaf35      | 61 | ETRIVSVTRDVSYEELMSKMRELYEDA AVLKYQPDEDLDALVSVVNDDDVVNMEEYDK  |
| consensus     | 61 |                                                              |

|                 |     |                                                                |
|-----------------|-----|----------------------------------------------------------------|
| BnaCTR1         | 92  | SSFGESSLSGDYYPVPTLSAAGNEIEMVGFPPQDVGL-----GDSRMQMGMSAGGSSS     |
| AtCTR1          | 98  | SSFGESSLSGDYYPVPTLSAAANEIESVGFPPQDDGFRLGFGGGGGDLRIQMAADSAGGSSS |
| OsMAPKKK6-DSM1  | 93  | QSVAAERRRSQEEEEWERRRSQEEEEAVREMRRSQEE-----DEVEERVIRESEAEER     |
| AtEDR1          | 75  | SSEEE-----YQVQLALAI SASNSQSS                                   |
| OsMAPKKK1-EDR1  | 87  | LSEEE-----FQMQLAMALSASNSECV                                    |
| BnaRaf33        | 1   | -----                                                          |
| BnaRaf39        | 1   | -----                                                          |
| BnaRaf36        | 1   | -----                                                          |
| BnaRaf22        | 1   | -----                                                          |
| BnaRaf28        | 1   | -----                                                          |
| BnaRaf34        | 1   | -----                                                          |
| BnaRaf41        | 1   | -----                                                          |
| BnaRaf37        | 1   | -----                                                          |
| BnaRaf21        | 1   | -----                                                          |
| BnaRaf29        | 1   | -----                                                          |
| BnaRaf30        | 1   | -----                                                          |
| OsMAPKKK43-ILA1 | 1   | -----                                                          |
| BnaRaf17        | 1   | -----                                                          |
| BnaRaf23        | 1   | -----                                                          |
| BnaRaf46        | 1   | -----                                                          |
| BnaRaf27        | 1   | -----                                                          |
| BnaRaf35        | 121 | LGSGDGFTRLRIFLFSPEMDGSSGYDDQRESEERRYVDALNNLVEGTDFRKVQQYPDSPR   |
| consensus       | 121 | 121                                                            |

|                 |     |                                                               |
|-----------------|-----|---------------------------------------------------------------|
| BnaCTR1         | 144 | GKSWAQQTEESYQLQLALALRLSSEATCADDPNFLDPVPDESALRTSPSSAETVSHRFWV  |
| AtCTR1          | 158 | GKSWAQQTEESYQLQLALALRLSSEATCADDPNFLDPVPDESALRTSPSSAETVSHRFWV  |
| OsMAPKKK6-DSM1  | 145 | KRVREKEDDDLEEFQLQLVLEMSARDNPEEMEIEVAKQISLGFCPPQSSTAEALAAARYWN |
| AtEDR1          | 97  | EDPEKHQIRAATLLSLGSHQRMDSRRDSS-----EVVAQRLSRQYWE               |
| OsMAPKKK1-EDR1  | 109 | GDL DGEQIRKAKLISLGRGNRFAAVRDD-----EQTADALSRRYRD               |
| BnaRaf33        | 1   | -----                                                         |
| BnaRaf39        | 1   | -----                                                         |
| BnaRaf36        | 1   | -----                                                         |
| BnaRaf22        | 1   | -----                                                         |
| BnaRaf28        | 1   | -----                                                         |
| BnaRaf34        | 1   | -----                                                         |
| BnaRaf41        | 1   | -----                                                         |
| BnaRaf37        | 1   | -----                                                         |
| BnaRaf21        | 1   | -----                                                         |
| BnaRaf29        | 1   | -----                                                         |
| BnaRaf30        | 1   | -----                                                         |
| OsMAPKKK43-ILA1 | 1   | -----                                                         |
| BnaRaf17        | 1   | -----                                                         |
| BnaRaf23        | 1   | -----                                                         |
| BnaRaf46        | 1   | -----                                                         |
| BnaRaf27        | 1   | -----                                                         |
| BnaRaf35        | 181 | FNLNDDDFSMVEPFNQLAIESGGGGSQRGNEIPVAQYNNLHQLRIPRVGSGQMIAARYGD  |
| consensus       | 181 | 181                                                           |



BnaCTR1 204 NG-----CLSYDVKVPDGFYIMIDGLDPYIWTLCIDLNESGRIPSIESL  
 AtCTR1 218 NG-----CLSYDVKVPDGFYMMNGLDPYIWTLCIDLHESGRIPSIESL  
 OsMAPKKK6-DSM1 205 FN-----ALGYDDRISDGFYDLYVTG-----NGPASITMPSLKDL  
 AtEDR1 139 YG-----VLDYEEKVVDSFYDVYSLS-----TDSAKQGEMPSLEDL  
 OsMAPKKK1-EDR1 150 YN-----FLDYHEKVIDGFYDIFGPS-----MESSKQGMPSLADL  
 BnaRaf33 1 -----  
 BnaRaf39 1 -----  
 BnaRaf36 1 -----  
 BnaRaf22 1 -----  
 BnaRaf28 1 -----  
 BnaRaf34 1 -----  
 BnaRaf41 1 -----  
 BnaRaf37 1 -----  
 BnaRaf21 1 -----MTNTDESESCGSR---AVVASPSKENP  
 BnaRaf29 1 -----MAIKDETEESCGR---AVVS-VTKENP  
 BnaRaf30 1 -----MIVVMESCGR---VLPMMSEAAME  
 OsMAPKKK43-ILA1 1 -----MDHGGQVSPVPATATAPRKY  
 BnaRaf17 1 -----  
 BnaRaf23 1 -----  
 BnaRaf46 1 -----  
 BnaRaf27 1 -----  
 BnaRaf35 241 VEGTWSPPYSPRHGHGFQEFSPSSARYRMPYGEVLDKGFDRMPEDYARAGHHPLYEHQ  
 consensus 241

BnaCTR1 247 RAIDSGVDSSLEAILVDRRVDPAFKELHN-----RVHDISCSCITTKEVVDQLAKLIC  
 AtCTR1 261 RAVDSGVDSSLEAIIVDRRSDPAFKELHN-----RVHDISCSCITTKEVVDQLAKLIC  
 OsMAPKKK6-DSM1 240 RAQSLSHRVNWEAVLVHRGEDPELMKLDQTALIMSLELRESKPSEFVGNDLVQKLAGLVA  
 AtEDR1 175 ESNHG--TPGFEAVVNRPIDSSLHELLEIA-----ECIALGCSTTSVSVLVQRLAELVT  
 OsMAPKKK1-EDR1 186 QTGIG--DLGFEVIVINRAIDTTLQEMEQA-----QCILLDFPVANIAALVQRIAEELVT  
 BnaRaf33 1 -----  
 BnaRaf39 1 -----  
 BnaRaf36 1 -----  
 BnaRaf22 1 -----  
 BnaRaf28 1 -----  
 BnaRaf34 1 -----  
 BnaRaf41 1 -----  
 BnaRaf37 1 -----  
 BnaRaf21 25 RQYRMKLDVYGEILQRLQESNYEEAALPDFEDQLWQHFNRLPARYALDVKVERAEDVLTH  
 BnaRaf29 25 RQQRMKLEVYGDVLQRIQESNYEEANLPDFDDHLWLHFNRLPARYAMDVNVERAEDVLTH  
 BnaRaf30 23 RRERMKVEVFEEVILRLRQSDNIDTDLPGFVDDLWAHFNRLPARYALDVNIERAEDVVMH  
 OsMAPKKK43-ILA1 21 RREHMRLGVYHDVLQRLRDAGAPEALAPDFAEKLWTHFHRFNASYAMDVNVERAEDVLMH  
 BnaRaf17 1 -----  
 BnaRaf23 1 -----  
 BnaRaf46 1 -----  
 BnaRaf27 1 -----  
 BnaRaf35 301 GQVPDNNVWVPAGATPLESKGGFPGNVLHGGPSGYEGGNICESCRVPPHKNHQPFDDQAN  
 consensus 301

|                 |     |                                                              |           |
|-----------------|-----|--------------------------------------------------------------|-----------|
| BnaCTR1         | 300 | NRMGGSVIMGEDELVPMWKECINGLKECFKVVVPIGSLSVGLCRHRALLFKVLADITDL  | P         |
| AtCTR1          | 314 | NRMGGPVIMGEDELVPMWKECIDGLKEIFKVVVPIGSLSVGLCRHRALLFKVLADITDL  | P         |
| OsMAPKKK6-DSM1  | 300 | RHMGGTFFDSEGMLVKYQKMMRYLRTSIGSVVPLGQLKIGLARHRALLFKVLADNIGIP  |           |
| AtEDR1          | 228 | EHMGGSADSSIVLARWTEKSSEFKAAALNTCVFPIGFVKIGISRHRALLFKVLADSVRLP |           |
| OsMAPKKK1-EDR1  | 239 | DHMGGPVKDANDMLTRWLEKSTELRTSLHTSLLPIGCIKIGLSRHRALLFKILADSVGIP |           |
| BnaRaf33        | 1   | -----                                                        |           |
| BnaRaf39        | 1   | -----                                                        |           |
| BnaRaf36        | 1   | -----IDEEASSWIRRAKFSQTVSYRLNSSKLAFFFPV                       |           |
| BnaRaf22        | 1   | -----                                                        |           |
| BnaRaf28        | 1   | -----                                                        |           |
| BnaRaf34        | 1   | -----                                                        |           |
| BnaRaf41        | 1   | -----                                                        |           |
| BnaRaf37        | 1   | -----                                                        |           |
| BnaRaf21        | 85  | QRLLKLAEDPATR-PVFDVHSVQVTPRNS-----ADSDPALEEDAQSSSHTSGQGV     | LAP       |
| BnaRaf29        | 85  | QRLLKLAEDPATR-PVFEVRCVQVSPSLNGHSADIDASDPVAKEDAQSSYHSSR--     | V LAP     |
| BnaRaf30        | 83  | HRLLLSALDPHNRRPAIQVRLVQVQPPPS-----DSL TNETSSPPRRKRS--        | I HPP     |
| OsMAPKKK43-ILA1 | 81  | MKLLKAIHPENQ-PAFSVRIVQVPLDIDAS---EADSQSNITEDDNCPTPRTP-AEH    | PA        |
| BnaRaf17        | 1   | -----                                                        | M SSE     |
| BnaRaf23        | 1   | -----MANIAGQLKRGISRQLSSVSLRRTFSRQFTRQASHDPRR                 | I NMR     |
| BnaRaf46        | 1   | -----MENVA AQLKRGISRQFSTGSMRRTLSRQFTRQSSLDPRRNMR             |           |
| BnaRaf27        | 1   | -----                                                        | MEDDYKTPR |
| BnaRaf35        | 361 | GFQPVPSAHCAQCPPNRETFMLNADPKPPTPHGAYANETFGHERGWIGQQQVNP       | PNPNP     |
| consensus       | 361 |                                                              | i         |

**ACT domain**  
**Ankyrin repeats**

|                 |     |                                         |                               |
|-----------------|-----|-----------------------------------------|-------------------------------|
| BnaCTR1         | 360 | CRIAKGCKYCNRDDAASCLVRFGLDREYLVDLVGKPGH  | L WEPD-----                   |
| AtCTR1          | 374 | CRIAKGCKYCNRDDAASCLVRFGLDREYLVDLVGKPGH  | L WEPD-----                   |
| OsMAPKKK6-DSM1  | 360 | CRLKGRQYTGSDDGALNIVKFDGREFIVDLVADPGT    | L I PSDGAVLSTEFEESSFSNNH      |
| AtEDR1          | 288 | CRLVKGSHYTGNEDDAVNTIRLEDEREYLVDLMTDPGT  | L I PADFASASNNTVEP-----       |
| OsMAPKKK1-EDR1  | 299 | CKLVKGSNYTGDDDDAINI IKMN-EREFLVDLMAAPGT | L I PSDVLSWKGNSLNSNARLTQ      |
| BnaRaf33        | 1   | -----                                   |                               |
| BnaRaf39        | 1   | -----                                   |                               |
| BnaRaf36        | 33  | KLNQEKLPGLKPIPDTSSSSTSTQADVYVVDSDVQV    | RNPV TNKQRSVSPSPQMALPD----    |
| BnaRaf22        | 1   | -----MLDGAKFNVLNHNNDNNYYTFTQDFYQKLN     | -EGTNMSMS-MQTSN----           |
| BnaRaf28        | 1   | -----MLEGPKFDMHAVG-NHHNYDAFTQDFYQKLG    | EETNMSTDSIQTSN----            |
| BnaRaf34        | 1   | -----                                   |                               |
| BnaRaf41        | 1   | -----                                   |                               |
| BnaRaf37        | 1   | -----                                   |                               |
| BnaRaf21        | 138 | PTFGSSPNFEAITLG-NKIVEDV--DSAVNATLT-TRP  | MHEITFSTIDKPKILLSQL----       |
| BnaRaf29        | 142 | PTFGSSPNFEAFTQAYKHHAEED--DSAVNAQFPNSR   | PMHEITFSTIDKPKILLSHL----      |
| BnaRaf30        | 134 | PAFGSSPNLEALALAHD-HDHDEGDNSVRNNSLYSRP   | LHEITFSTLTKPKILLQL----        |
| OsMAPKKK43-ILA1 | 136 | PIFGSTTALKALVRQASSKNLLD----DNQDIDAILR   | PMHEITFASDDKPKGLTQL----       |
| BnaRaf17        | 5   | ASATAGDGGEQAVSAAGTSAGYDKQKEKARVSR       | TSLILWHAHQNDAAVRKILLEED----   |
| BnaRaf23        | 44  | FSFGRQSSLDPIRRS-PEGSG-HPQLAVPDNI        | DATMQLLFVECGGDVEGVRDLLDD----  |
| BnaRaf46        | 44  | FSFGRQSSLDPIRRS-PESLGCEPKMSVPENI        | DSTMQLLFMASKGDVDGVEELLDE----  |
| BnaRaf27        | 10  | FTIGRQSSMAPEKIPEPSIHSEEEVLEDGEE         | DGGVRLMYLCNEGDVEGIKELLDS----  |
| BnaRaf35        | 421 | PRIDEGRPLLSIVGRPSDHYTLDGPGMNYPF         | GHRPGPELISNEGFDKPLGGIPLNPSNPS |
| consensus       | 421 |                                         | 1 v                           |

|                 |     |                                                               |
|-----------------|-----|---------------------------------------------------------------|
| BnaCTR1         | 403 | -----                                                         |
| AtCTR1          | 417 | -----                                                         |
| OsMAPKKK6-DSM1  | 420 | HFNKDNDIRQLGSSNSLSNSACSSFECCELLDRRSTWINVGPSDSDGATTSQTSKNNQQNT |
| AtEDR1          | 342 | -----CNSNGNKFP                                                |
| OsMAPKKK1-EDR1  | 358 | N-----PLAGSSSTTDSNLSANALP                                     |
| BnaRaf33        | 1   | -----                                                         |
| BnaRaf39        | 1   | -----                                                         |
| BnaRaf36        | 89  | -----                                                         |
| BnaRaf22        | 45  | -----                                                         |
| BnaRaf28        | 46  | -----                                                         |
| BnaRaf34        | 1   | -----                                                         |
| BnaRaf41        | 1   | -----                                                         |
| BnaRaf37        | 1   | -----                                                         |
| BnaRaf21        | 190 | -----                                                         |
| BnaRaf29        | 196 | -----                                                         |
| BnaRaf30        | 189 | -----                                                         |
| OsMAPKKK43-ILA1 | 188 | -----                                                         |
| BnaRaf17        | 61  | -----                                                         |
| BnaRaf23        | 98  | -----                                                         |
| BnaRaf46        | 99  | -----                                                         |
| BnaRaf27        | 66  | -----                                                         |
| BnaRaf35        | 481 | AEERGFHYGNLYAPGPESVHSASHSHIYPQQNIWQNVPNHISGAPGLPMQQVNGTANQT   |
| consensus       | 481 |                                                               |

|                 |     |                                                              |
|-----------------|-----|--------------------------------------------------------------|
| BnaCTR1         | 403 | -----SLLNGPSTISISSPLRFPRPRPVEP---                            |
| AtCTR1          | 417 | -----SLLNGPSSISISSPLRFPRPKPVEP---                            |
| OsMAPKKK6-DSM1  | 480 | LSDSFGILSVSTFTSENRPITNESRSTDDIAAAKNKERSVTINSSSTSPSPSSPEVGST  |
| AtEDR1          | 351 | TAQFSNDVPKLSEG-----EGSSHSMANYSSSLDRRTEAERTDSSYPKVGPLRNIDY    |
| OsMAPKKK1-EDR1  | 378 | PGHKGGQLPLFSSGDWILASQSGYEKDGATTSSQASSSGTTSVAAGSAFDSSWTLVSHGQ |
| BnaRaf33        | 1   | -----                                                        |
| BnaRaf39        | 1   | -----                                                        |
| BnaRaf36        | 89  | -----                                                        |
| BnaRaf22        | 45  | -----                                                        |
| BnaRaf28        | 46  | -----                                                        |
| BnaRaf34        | 1   | -----                                                        |
| BnaRaf41        | 1   | -----                                                        |
| BnaRaf37        | 1   | -----                                                        |
| BnaRaf21        | 190 | -----                                                        |
| BnaRaf29        | 196 | -----                                                        |
| BnaRaf30        | 189 | -----                                                        |
| OsMAPKKK43-ILA1 | 188 | -----                                                        |
| BnaRaf17        | 61  | -----                                                        |
| BnaRaf23        | 98  | -----                                                        |
| BnaRaf46        | 99  | -----                                                        |
| BnaRaf27        | 66  | -----                                                        |
| BnaRaf35        | 541 | VIRNPMSASRYSIGVENQSVLVGSPQNI SGFDAMSSPGQPYYPNPHFQDRAFPLDPNWV |
| consensus       | 541 |                                                              |

|                 |     |                                                                  |
|-----------------|-----|------------------------------------------------------------------|
| BnaCTR1         | 428 | -----                                                            |
| AtCTR1          | 442 | -----                                                            |
| OsMAPKKK6-DSM1  | 540 | PAVRRMKVKDISEYMINAAKENPQLAQKIHEVLLLENGVVPDLPFSEDSMEEPKDLIVYD     |
| AtEDR1          | 404 | SSPSSVTSSTQLENNSSSTAIGKGSRGAIIECSRTNMNIVPYNQNSEEDPKNLFADLNPFQ    |
| OsMAPKKK1-EDR1  | 438 | SDDPSTSAGMSAQQKVILPGGEGHPWNNENINARNENIKLVSVDLQGNSES-INLNFADLNPFQ |
| BnaRaf33        | 1   | -----                                                            |
| BnaRaf39        | 1   | -----                                                            |
| BnaRaf36        | 89  | -----                                                            |
| BnaRaf22        | 45  | -----                                                            |
| BnaRaf28        | 46  | -----                                                            |
| BnaRaf34        | 1   | -----                                                            |
| BnaRaf41        | 1   | -----                                                            |
| BnaRaf37        | 1   | -----                                                            |
| BnaRaf21        | 190 | -----                                                            |
| BnaRaf29        | 196 | -----                                                            |
| BnaRaf30        | 189 | -----                                                            |
| OsMAPKKK43-ILA1 | 188 | -----                                                            |
| BnaRaf17        | 61  | -----                                                            |
| BnaRaf23        | 98  | -----                                                            |
| BnaRaf46        | 99  | -----                                                            |
| BnaRaf27        | 66  | -----                                                            |
| BnaRaf35        | 601 | PSENQAVRSEYLQGLKPLTGPMLQTNLDGAPIMQTPDCVEVVRPVESKVAQGGEHINCVD     |
| consensus       | 601 | -----                                                            |

**ACT domain   Ankyrin repeats**

|                 |     |                                                               |
|-----------------|-----|---------------------------------------------------------------|
| BnaCTR1         | 428 | -----AVDFRELAKQYFTDSESLNLFVDPASDDIIGFSMFHR-----GGENDGSAE      |
| AtCTR1          | 442 | -----AVDFRLLAKQYFSDSQSLNLFVDPASDDMIGFSMFHRQYDNPGGENDALAE      |
| OsMAPKKK6-DSM1  | 600 | TTLFQSKDEMCKRMNELGSREYADRGHGPLLPHHPGHELPSPKVPHRAPLDSLKPVEGLGI |
| AtEDR1          | 464 | NKGADKLYMPTKSGLNNVDDFHQQKNN--PLVGRSPAPMMWKNYS-CNEAPKRKENSYIE  |
| OsMAPKKK1-EDR1  | 497 | GREPKRTSVPLNGPDNRNNEIQRRRENVVSPSTRRPQQRIVMKNWSPYNDVSNKKQYNYVE |
| BnaRaf33        | 1   | -----MKEGNDGFVRADQIDLKSLDEQIERHLSRALTLEKNKKRD                 |
| BnaRaf39        | 1   | -----METPNEIKASPGNNLRNRGAVGNDKSKDMI FRA                       |
| BnaRaf36        | 89  | -----VFKEARSERQRFSTPHPRMDSEKGMKPKISHKNSFDKRRS FNLRS           |
| BnaRaf22        | 45  | -----AGGFVSMMSVDNSSVGSDDALIGHPLKPLRNNAYS SPVGSVYRPR           |
| BnaRaf28        | 46  | -----AGGSVSMMSVDNSSVGSDDALIGHPLKPMR-HPYLSLVGQSVFRPG           |
| BnaRaf34        | 1   | -----                                                         |
| BnaRaf41        | 1   | -----                                                         |
| BnaRaf37        | 1   | -----MPRGYQRAPSIEATTEIPAEEKLHPNYPFLM                          |
| BnaRaf21        | 190 | -----TSLLGELGLNIQEAHAFSTVDGFSIDVVFVVDGWSQEETDGLKDAL S         |
| BnaRaf29        | 196 | -----TALLGELGLNIQEAHAFSTADGFSIDVVFVVDGWSQEETEGLKDAL K         |
| BnaRaf30        | 189 | -----TALLAELGLNIQEAHVSTTDGFSIDVVFVVDGWPYEEVDRLRVALE           |
| OsMAPKKK43-ILA1 | 188 | -----SSLGNNLNDI KEVHALSTNDGYFLDIFIVIGWDHKETQLLEEAL E          |
| BnaRaf17        | 61  | -----PSLVHARDYDKRTPLHVASLHGVIDVNVNCLIEFGADVNAQDRW             |
| BnaRaf23        | 98  | -----GIDVNSIDL DGR TALHIAACEGHVEVVKLLLTRKANIDARDRW            |
| BnaRaf46        | 99  | -----GIDVNSIDL DGR TALHIASCEGHYDVVKVLLSRRANIDARDRW            |
| BnaRaf27        | 66  | -----GIDANYRDI DGR TALHVAACQGLKDVVEILLDRGADVDPKDRW            |
| BnaRaf35        | 661 | TGVSDGVPCLDKHQPLAEGKNDIVEVSPSAAAPPEGAELSVERTLSFLPELMESVKRAALE |
| consensus       | 661 | -----                                                         |

TSLLGELGLNIQEAHAFSTVDGFSIDVVFVVDGWSQEETDGLKDAL S  
TALLGELGLNIQEAHAFSTADGFSIDVVFVVDGWSQEETEGLKDAL K  
TALLAELGLNIQEAHVSTTDGFSIDVVFVVDGWPYEEVDRLRVALE  
SSLLGNNLNDI KEVHALSTNDGYFLDIFIVIGWDHKETQLLEEAL E  
PSLVHARDYDKRTPLHVASLHGVIDVNVNCLIEFGADVNAQDRW  
GIDVNSIDL DGR TALHIAACEGHVEVVKLLLTRKANIDARDRW  
GIDVNSIDL DGR TALHIASCEGHYDVVKVLLSRRANIDARDRW  
GIDANYRDI DGR TALHVAACQGLKDVVEILLDRGADVDPKDRW

1
g
i
ml

```

BnaCTR1      473  NGGGSVPPGANMPPQNIMRASNVQDAVPINAPPINQPVVNRANRDLG-----
AtCTR1      492  NGGGSLPPSANMPPQNMMRASNQIEAAP-MNAPPISQPVPNRANRELG-----
OsMAPKKK6-DSM1 660  DHPPDIQDNTSFISQYEPSAPPQEASSQLTKQLPVTAAAVATAAVVASSMVVAAAKSNNND
AtEDR1      521  NLLPKLHRDPRYGNTQSSYATSSSNGAISS-----NVHGRDNVTFVSPVAVPSSFT
OsMAPKKK1-EDR1 557  DSFARRNIGDNAASSSQVARPSAKNTNLNVGVRTDTPYMAAHNYDNSMAGSSAMKMTSTA
BnaRaf33    41   EEESAAAIGASASSSPVAALNGG-----FVGQRKQRLE-----
BnaRaf39    34   DRIDLKNLDIQLEKHLRSRVWSRN-----TEKNPKPKEE-----
BnaRaf36    135  PSVPIRDLSTLRIQERVKSMKDTGWSKIFDNAGRKVSADDAEEE-----
BnaRaf22    91   KITHPLDNDALTHALMDNMYPTGEG-----LANYEE-----
BnaRaf28    91   RVTHALNDDALAQAALMDSSYPTQG-----LANYEE-----
BnaRaf34    1   MILAMDSLNG-----YRLEPK-----
BnaRaf41    3   SASGFYSNEG-----FELDPK-----
BnaRaf37    32   SSKGLESDDSDSDSDLDYDDQF-----HFSINDD-----
BnaRaf21    236  KEILKLDKQPGSKQKSIAFFEHDKSSNE-LIPACTEIPDGTDE-----
BnaRaf29    242  KEILKLDKQPSSRQKSIFFEHDKSTNE-LLPACVEIPDGTDE-----
BnaRaf30    235  TEAAKIELQDQSWPMQSFSPK-QONG--TAKDHVVIPTDGTDV-----
OsMAPKKK43-ILA1 234  KEIHNYEPOMPSKSSCWPELAGKOSLINSOVNHVQI PKDNTDE-----
BnaRaf17    104  KNTPLADAEGARKQKMIELLKSHGGLSYGQNGSHFFPKPVQPPI-----
BnaRaf23    141  GSTAAADAKYYGNMDVYNILKARGARVPKTKRTPMVVANPR-----
BnaRaf46    142  GSTAAVDKYYGNTEVYNLLKARGAKAPKTRKTPMTVGNPK-----
BnaRaf27    109  GSTPLADAFYKNVDVTKILETHGAKHP---MAPMIVKTPR-----
BnaRaf35    721  GAAEVKAHPPEEANDPVRPELVENESEHVNAQVEHEDSDSDNPNNFKIEP-----
consensus   721  i

```

```

BnaCTR1      521  -----
AtCTR1      539  -----
OsMAPKKK6-DSM1 720  VNFVDPVAAAATVTAADVATTAAVSKQYEHLEPGNQLHSLPSPSEGNESIEKSADEFWD
AtEDR1      572  STENQFRPSIVEDMNR-NTNNELDLQPHTAAVHVGQOND----ESHIHDKRKYTSDDIST
OsMAPKKK1-EDR1 617  GIGKVPDKVLYGDLKGLTNSRLGDQPPIERHKWGNVVEGRIPTGTVHNQAKEHKENFDG
BnaRaf33    74   -----
BnaRaf39    67   -----
BnaRaf36    179  -----
BnaRaf22    121  -----
BnaRaf28    121  -----
BnaRaf34    17   -----
BnaRaf41    19   -----
BnaRaf37    63   -----
BnaRaf21    279  -----
BnaRaf29    285  -----
BnaRaf30    276  -----
OsMAPKKK43-ILA1 278  -----
BnaRaf17    148  -----
BnaRaf23    182  -----
BnaRaf46    183  -----
BnaRaf27    147  -----
BnaRaf35    770  -----
consensus   781  -----

```

|                 |     |                                                                        |
|-----------------|-----|------------------------------------------------------------------------|
| BnaCTR1         | 521 | -----LDGDDMDIPWCDLN                                                    |
| AtCTR1          | 539 | -----LDGDDMDIPWCDLN                                                    |
| OsMAPKKK6-DSM1  | 780 | KQNF EIDHGQDNTLDQEKDSAEVRQDAERTSDKSSGTESAKSEITLDDVAE E E I Q W E E I T |
| AtEDR1          | 627 | GCDPRLKDHESTSSSLDSTSYRNDPQVLDD-----ADVGECEIPWNDLV                      |
| OsMAPKKK1-EDR1  | 677 | KQDNKKLHPDPKKSPLDRFMDTSMPSRNPESVSPSFARSHKLDTMFDDVSECEIHWEDLV           |
| BnaRaf33        | 74  | -----WEIDPSKLI                                                         |
| BnaRaf39        | 67  | -----WEIELAKLE                                                         |
| BnaRaf36        | 179 | -----FRIDTSKLF                                                         |
| BnaRaf22        | 121 | -----WTINLRNLR                                                         |
| BnaRaf28        | 121 | -----WTIDLRLKH                                                         |
| BnaRaf34        | 17  | -----WEIDPQLLF                                                         |
| BnaRaf41        | 19  | -----WLVDPRHLLF                                                        |
| BnaRaf37        | 63  | -----VLVDAKEVS                                                         |
| BnaRaf21        | 279 | -----WEIDVKQLK                                                         |
| BnaRaf29        | 285 | -----WEIDMKQLK                                                         |
| BnaRaf30        | 276 | -----WEINLKQLK                                                         |
| OsMAPKKK43-ILA1 | 278 | -----WEINFVDVLD                                                        |
| BnaRaf17        | 148 | -----PKKCDWEIEPAELD                                                    |
| BnaRaf23        | 182 | -----EVPEYELNPQELQ                                                     |
| BnaRaf46        | 183 | -----EVPEYELNPLELQ                                                     |
| BnaRaf27        | 147 | -----EVPEYELNPSELQ                                                     |
| BnaRaf35        | 770 | -----TKAEAEALSRLQTIKND                                                 |
| consensus       | 841 | -----wei 1                                                             |

### Motif 1 (subdomain I)

#### Protein kinases ATP-binding region signature

(I/V)GXG(S/F)(F/Y) (S/G/A) (K/D/T/E)VX(K/R/H)(G/A) X(W/F)(H/F/N)G

|                 |     |                                                                 |
|-----------------|-----|-----------------------------------------------------------------|
| BnaCTR1         | 535 | IK--EKIGAGSFGTVHRAEWHGSDVAVKILMEQDFH-----AERVNEFLREVAIMKR       |
| AtCTR1          | 553 | IK--EKIGAGSFGTVHRAEWHGSDVAVKILMEQDFH-----AERVNEFLREVAIMKR       |
| OsMAPKKK6-DSM1  | 840 | IG--ERIGLGSFGEVYRGGEWHGTEVAVKKFLQDDIS-----SDALEEFERTEVRI I KR   |
| AtEDR1          | 671 | IA--ERIGLGSYGEVYHADWHGTEVAVKKFLDQDFS-----GAALAEFRSEVRIMRR       |
| OsMAPKKK1-EDR1  | 737 | IG--ERIGLGSYGEVYRADWNGTEVAVKKFLDQDFY-----GDALDEFERSEVRIMRR      |
| BnaRaf33        | 83  | IK--TVLARGTFTGTVHRGIYDGDQ--VAVKLLDWGEEGHRSEAEIVSLRADFAQEVAVWHK  |
| BnaRaf39        | 76  | MS--NV IARGAYGIVYKGIYDGDQ--VAVKVL DWGEDGYATTAETSALRASFRQEVGVWHK |
| BnaRaf36        | 188 | LG--LRFAGHLYSKLYHGKYEKDA--VAVKLITVPDD--DENGCLGARLEKQFTKEVTLISR  |
| BnaRaf22        | 130 | MG--PPFAQGAFGKLYKGSYNGVD--VAIKILERPEN---SLEKAQFMEOQFQQEVTMLAN   |
| BnaRaf28        | 130 | MG--PAFAQGAFGKLYRGTYNGED--VAIKLLERPEN---SPEKAQALEQQFQQEVSMLSF   |
| BnaRaf34        | 26  | VG--PKIGEGAHAKVYEGKYKNQT--VAIKI IHRGET---PEEIAKRDSRFLREVEMLSR   |
| BnaRaf41        | 28  | VG--PKIGEGAHAKVYEGKYRNQT--VAIKI IKRGES---PEEIAKRDSRFARE IAML SK |
| BnaRaf37        | 72  | LG--ELIGEGSSSKVYRGLFREVNVPVSVRI FQPERA---AAVSVEQKRREFEREVLLLSK  |
| BnaRaf21        | 288 | IE--KKVASGSYGDLHKGTYCSQE--VAIKFLK-----PERVNTEMLREFSQEVYIMRK     |
| BnaRaf29        | 294 | IE--KKVACGSYGELYKGTYCSQE--VAIKILK-----PERVNTEMLREFSQEVYIMRK     |
| BnaRaf30        | 285 | FG--HKIASGSYGNLYKGTYLSQE--VAIKILK-----PERLDSELEKEFSQEVFIMRK     |
| OsMAPKKK43-ILA1 | 287 | IQ--EKVASGTYGDLYRGTYFGED--VAIKVLK-----SDRLNENMQEEFNEEVFIMRK     |
| BnaRaf17        | 162 | FSNAAMIGKGSFGEIVKAYWRGTPVAVKRILPSLSD-----DRLVIQDRHEVDLLVK       |
| BnaRaf23        | 195 | VRKADGISKSCQGIYQVAKWNGTKVSVMI LDKDLYK-----DNETIEAFKHELTLLEK     |
| BnaRaf46        | 196 | VRKVDGISK---GTYQVAKWNETRVSVKIFDKDSYS-----DPERVNAFNHELTLIAK      |
| BnaRaf27        | 160 | FTQSKEITK---GTYCMAMWRGIQVAVKKLDDKVLS-----DEDQVRKEHDELALLQR      |
| BnaRaf35        | 789 | LEEIRELGSPTYGSVYHGKWKGS DVAIKRIKASCFAG--KPSE RERLIEDFWKEALLISS  |
| consensus       | 901 | i kig gsf g vyrg y g d vavkll elv eF Ev ilkk                    |

|                 |     |                                                    |                    |
|-----------------|-----|----------------------------------------------------|--------------------|
| BnaCTR1         | 585 | LRHPNIVLFGAVTQPP-----NLSIVTEYLSRGSILYRLLHKS        | SGAREQ             |
| AtCTR1          | 603 | LRHPNIVLFGAVTQPP-----NLSIVTEYLSRGSILYRLLHKS        | SGAREQ             |
| OsMAPKKK6-DSM1  | 890 | LRHPNVVLFMGAITRVP-----NLSIVTEFLPRGSLFRLIHRP--      | NNQ                |
| AtEDR1          | 721 | LRHPNVVFFLGAVTRPP-----NLSIVTEFLPRGSLYRILHRP--      | KSH                |
| OsMAPKKK1-EDR1  | 787 | LRHPNIVLFGAVTRPP-----NLSIVSEYLPKGSILYKILHRP--      | NCQ                |
| BnaRaf33        | 140 | LDHPNVTKFIGATMGASGLQLQT-ESGPLAMPNNICCVVVEYLQGGAL   | KSFLLIKN-RRRK      |
| BnaRaf39        | 133 | LNHPNVTKFVFGASMGTTNLKIPSSAEMENSLPQRACCVVVEYLPGG    | TLKQYLFRN-RRRK     |
| BnaRaf36        | 244 | LSHPNVIKFVGAYKDP-----SYCVLITEYLPKGSILSYLHKP-ENRT   |                    |
| BnaRaf22        | 184 | LKHPNIVRFIGACRKPM-----VWCIVTEYAKGGSVRQELTKR-QNRA   |                    |
| BnaRaf28        | 184 | LKHPNIVRFIGACIKPM-----VWCIVTEYTKGGSVRQELTKR-QNRA   |                    |
| BnaRaf34        | 79  | VQHKNLVKFIGACKEPV-----MVIIVTELLQGGTLRKYLIVNL-RPAC  |                    |
| BnaRaf41        | 81  | VQHKNLVKFIGACKEPM-----MVIIVTELLLGGTLRKYLIVSL-RPKR  |                    |
| BnaRaf37        | 126 | IQHENIVQFIGACVKPK-----LMIVTELMEGNTLHKFMLST-RPNP    |                    |
| BnaRaf21        | 338 | VRHKNVVQFLGACTRSP-----TLCIVTEFMARGSIYDFLHK--QKCA   |                    |
| BnaRaf29        | 344 | VRHKNVVQFIGACTRSP-----NLCIVTEFMARGSIYDFLHK--QKGV   |                    |
| BnaRaf30        | 335 | VRHKNVVQFIGACTKPP-----HLCIVTEFMPGGSVYDYLHK--QKGV   |                    |
| OsMAPKKK43-ILA1 | 337 | IRHKNIVRFLGACTKSP-----TLCIVTEFMKNGSVYDYLHK--RKGS   |                    |
| BnaRaf17        | 215 | LRHPNIVQFLGAVTERK-----SLMLITEYLRGGDLHQYLKEK---GG   |                    |
| BnaRaf23        | 248 | VRHPNVVQFVGAVTQNV-----PMMIVSEYHPKGDLSGYLQKK---GR   |                    |
| BnaRaf46        | 246 | ARHPNIVQFVGAVTQNL-----PMMIVVEHNPKGDLSGYLQKK---GR   |                    |
| BnaRaf27        | 210 | LRHPNIVQVLGAVTQSN-----PMMIVTEYLPKGDLLRELLKRRK---VQ |                    |
| BnaRaf35        | 847 | LHHPNVVSYGIVRDGPD-----GSLATVAEFMVNGSLKQFLQKK--DRT  |                    |
| consensus       | 961 | lrHpNiv fmGa t pp                                  | l ivtEyl gslk flhk |

## Motif 2

### Serine/Threonine protein kinases active-site signature [LIVMFYC]X[HY]XD[LIVMFY]KXXN[LIVMFYCT]XXX

|                 |      |                                                       |         |
|-----------------|------|-------------------------------------------------------|---------|
| BnaCTR1         | 628  | LDERRRLSMAYDVAKGMNYLHNRN-----PPIVHRDLK                |         |
| AtCTR1          | 646  | LDERRRLSMAYDVAKGMNYLHNRN-----PPIVHRDLK                |         |
| OsMAPKKK6-DSM1  | 931  | LDERKRLRMALDVARGMNYLHNCT-----PVIIVHRDLK               |         |
| AtEDR1          | 762  | IDERRRIKMALDVAMGNCLHTST-----PTIVHRDLK                 |         |
| OsMAPKKK1-EDR1  | 828  | IDEKRRIKMALDVAKGMNCLHISV-----PTIVHRDLK                |         |
| BnaRaf33        | 198  | LAFKVVVQLALDLARGLSYLSHSQK-----IVHRDVK                 |         |
| BnaRaf39        | 192  | LAIRVVVQLALDLARGLSYLSHSER-----IVHRDVK                 |         |
| BnaRaf36        | 286  | LSLKKLIEFALDIARGMEYIHSRR-----IIHRDLK                  |         |
| BnaRaf22        | 226  | VPLKIAVKQALDVARGMAYVHAHN-----IIHRDLK                  |         |
| BnaRaf28        | 226  | VPLKLAVKQALDVARGMAYVHERN-----FIHRDLK                  |         |
| BnaRaf34        | 120  | LETPVAIGFALDIARGMECLHSHG-----IIHRDLK                  |         |
| BnaRaf41        | 122  | LDIRLAVAFALDIARAMECLHSHG-----IIHRDLK                  |         |
| BnaRaf37        | 167  | LDLKLAI SFALDIARGMEFLNANG-----IIHRDLK                 |         |
| BnaRaf21        | 379  | FKLQTLKVALDVAKGMCYLHQNNIIHRDLKTANLLMDEHGLAKGVCYLHQNNI | IHRDLK  |
| BnaRaf29        | 385  | FKLQSLKVALDVSKGMNYLHQ-----NIIHRDLK                    |         |
| BnaRaf30        | 376  | FKLPALFKVAIDICKGMNYLHQ-----NIIHRDLK                   |         |
| OsMAPKKK43-ILA1 | 378  | FKLPSSLKAAVDISKGMNYLHQ-----KIIHRDLK                   |         |
| BnaRaf17        | 255  | LTPATAVNFALDIARGMTYLHNE-----PNVIHRDLK                 |         |
| BnaRaf23        | 288  | LSPSKVLRFALDIARGMNYLHECK-----PEPVIHC DLK              |         |
| BnaRaf46        | 286  | LSPSKALRFALDIARGMNYLHECK-----PDPFIHC DLK              |         |
| BnaRaf27        | 250  | LKPATAVRYALDIARGMSYLHEIK-----GDPIHRDLK                |         |
| BnaRaf35        | 890  | IDRRKRII IAMD TAFGMEYLYHGKN-----IVHF DLK              |         |
| consensus       | 1021 | l r lrmAlDiargm ylh                                   | iiHrDlk |

|                 | <b>Motif 2</b>                              | <b>Motif 3</b>                                           | <b>Motif 4 (Subdomain VIII)</b>                    |
|-----------------|---------------------------------------------|----------------------------------------------------------|----------------------------------------------------|
|                 | <b>Tyrosine kinase phosphorylation site</b> | <b>GTXX(W/Y)MAPE</b>                                     |                                                    |
|                 |                                             | <b>[R/K]X<sub>{2,3}</sub>[D/E]X<sub>{2,3}</sub>Y</b>     |                                                    |
| BnaCTR1         | 661                                         | SPNLLVDK----                                             | KYTVKVCDFGLSRLKASTFLS-----SKTAAAGTPEWMAPEVLRD---   |
| AtCTR1          | 679                                         | SPNLLVDK----                                             | KYTVKVCDFGLSRLKASTFLS-----SKSAAGTPEWMAPEVLRD---    |
| OsmAPKKK6-DSM1  | 964                                         | SPNLLVDK----                                             | NWVVKVCDFGLSKMKNKTFLS-----SRSTAGTAEWMAPEVLRN---    |
| AtEDR1          | 795                                         | TPNLLVDN----                                             | NWNVKVGDGFLSRLKHNTFLS-----SKSTAGTPEWMAPEVLRN---    |
| OsmAPKKK1-EDR1  | 861                                         | SPNLLVDN----                                             | NWNVKVGDGFLSRLKHSTFLS-----SKSTAGTPEWMAPEVLRN---    |
| BnaRaf33        | 229                                         | TENMLLDK----                                             | TRTVKIADFGVARVEASNPND-----MTGETGTGLGYMAPEVLN----   |
| BnaRaf39        | 223                                         | TENMLLDY----                                             | QRNLKIADFGVARVEAQNPKD-----MTGETGTGLGYMAPEVLD----   |
| BnaRaf36        | 317                                         | PENVLIDK----                                             | DFQLKIADFGIA-CEEEYCDM-----LADDPGTYRWMAPEMIK----    |
| BnaRaf22        | 257                                         | SDNLLISA----                                             | DKSIKIADFGVARIHVHTEG-----MTPETGTYRWMAPEMIQ----     |
| BnaRaf28        | 257                                         | SDNLLISA----                                             | DRSIKIADFGVARIHVHTEG-----MTPETGTYRWMAPEMIQ----     |
| BnaRaf34        | 151                                         | PENLLITA----                                             | DHKTVKLADDFGLAREESLTEM-----MTAETGTYRWMAPELYSTVTL   |
| BnaRaf41        | 153                                         | PENLLISA----                                             | DHKTVKLADDFGLAREESLTEM-----MTAETGTYRWMAPELYSTVTL   |
| BnaRaf37        | 198                                         | PS--INDL----                                             | FWLNQVLSLIQDCGIEETKGF-----MTSEAGTYRWMAPEIFSHEAL    |
| BnaRaf21        | 439                                         | TANLLMDE----                                             | HGLVKVADFGVARVQIESGV-----MTAETGTYRWMAPEVIEH---     |
| BnaRaf29        | 416                                         | TANLLMDE----                                             | HDVVKVADFGVARVQTQSGV-----MTAETGTYRWMAPEVIEH---     |
| BnaRaf30        | 407                                         | AANLLMDE----                                             | NEVVKVADFGVARVKAQTGV-----MTAETGTYRWMAPEVIEH---     |
| OsmAPKKK43-ILA1 | 409                                         | TANLLMDE----                                             | HELIKVADFGVARVKAESGI-----MTAETGTYRWMAPEVIEH---     |
| BnaRaf17        | 288                                         | PRNVLVNS--                                               | SADHLKVGDFGLSKLIKVQNS--HDVYKMTGETGTSYRYMAPEVFKH--- |
| BnaRaf23        | 322                                         | PKNIMLD----                                              | NGGLLVKAGFGLISFEKLSDDKSKVLNHGAHIDLSNYCVAPEVYRD---  |
| BnaRaf46        | 320                                         | PKNILLD----                                              | RGGLLVKICGFLVVKLSKISEDNFKVVKHEAHIDKSNYYVAPEIYKN--- |
| BnaRaf27        | 284                                         | PSNILRD----                                              | DTGHLKVADFGVSKLVTVKED-----KPFTCLDTSCRYIAPEVFTS---  |
| BnaRaf35        | 921                                         | CENLLVNRDPQRPVCKIGDLGLSKVKQKTLVS-----GGVRLPFWMAPELLSG--- |                                                    |
| consensus       | 1081                                        | s nllvd                                                  | vkvadfgl rl t mtgetgtyrwmAPEvl                     |

|                 |      |                                                               |                         |
|-----------------|------|---------------------------------------------------------------|-------------------------|
| BnaCTR1         | 708  | -----EQSNEKSDVYSFGVILWELATLQQPWGNLNP---                       | AQVVAAVGFKNKRLEIPRNLN   |
| AtCTR1          | 726  | -----EPSNEKSDVYSFGVILWELATLQQPWGNLNP---                       | AQVVAAVGFKCKRLEIPRNLN   |
| OsmAPKKK6-DSM1  | 1011 | -----EPSDEKCDVFSYGVILWELCTLLQQPWGGMNA---                      | MQVVGAVGFQNRRLDIPDNTD   |
| AtEDR1          | 842  | -----EPSNEKCDVYSFGVILWELATLRLPWRGMNP---                       | MQVVGAVGFQNRRLDIPKELD   |
| OsmAPKKK1-EDR1  | 908  | -----EQSNEKCDVYSFGVILWELATLRMPWSGMNP---                       | MQVVGAVGFQDKRLDIPKEID   |
| BnaRaf33        | 275  | ----GNPYNRKCDVYSFGICLWERYCCDMPYPDLTF---                       | SEVTSAVVRQNLRPDI PRCCP  |
| BnaRaf39        | 269  | ----GKPYNRRCDVYSFGICLWEIYCCAMPYPDLTF---                       | ADVSSAVVRQNLRPDI PRCCP  |
| BnaRaf36        | 362  | ----RKPHGRKADVYSFGLVLEWVAGATPYEDMNP---                        | LQAAFAVVKHNRPAIPEDCP    |
| BnaRaf22        | 302  | ----HRTYNQKVDVYSFGIVLWELITGQLPFQNMFTA---                      | VQAAFAVVRNRRGVRPTIPNDCL |
| BnaRaf28        | 302  | ----HRPYTQKVDVYSFGIVLWELITGLLPFQNMFTA---                      | VQAAFAVVRNRRGVRPTIPADCL |
| BnaRaf34        | 201  | RLGEKKHYNNKVDAYSFAIVLWELLHNKLPFEGMSN---                       | LQAAAYAAAFKNVRPSA-ESLP  |
| BnaRaf41        | 203  | RHGEKKHYNNKVDAYSFAIVLWELLILNKLPFEGMSN---                      | LQAAAYAAAFKNLRPSA-EDLP  |
| BnaRaf37        | 246  | QVGEKKEYDHKVDVYSFTIVFWELLTNKVPFKGKNN---                       | IFVAYAAS-KNQRPSI-DNIP   |
| BnaRaf21        | 485  | ----KPYSHKADVFSYAIVLWELLTGDIPIYAFITP---                       | LQAAVGVVQKGLRPKIPKKTTH  |
| BnaRaf29        | 462  | ----KPYDHRADVFSYAIVLWELLTGELPYSYLTTP---                       | LQAAVGVVQKGLRPKIPKQTH   |
| BnaRaf30        | 453  | ----KPYDHKADVFSYGIVLWELLTGKLPYEMTP---                         | LQAAVGVVQKGLRPKIPKKTTH  |
| OsmAPKKK43-ILA1 | 455  | ----KPYDSKADVFSFGVVLWELLTGKIPHEFLTTP---                       | LQAAIGVVQEGLRPVIKATD    |
| BnaRaf17        | 341  | ----RKYDKKVDVFSFAMILYEMLEGEPPFANYEPYEAAKHVSDG-HRPSFRS--       | KGCT                    |
| BnaRaf23        | 375  | ----EIFDRSADSYSGVILYEMIEGVQPFHFKPPEEAVKLMCLEGRRRPSFKAKTKSCP   |                         |
| BnaRaf46        | 373  | ----NIFDKRVDVHSFGVILYEMTEGVSIHFHFKPPEEIAELICMEGRRRPTIKTKSKSYP |                         |
| BnaRaf27        | 332  | ----EEYDTKADVFSFALIVQEMIEGRMPFAEKEDSEASEAYASK-ERPIFKAPSKLYP   |                         |
| BnaRaf35        | 971  | ---KSNMVSEKIDVYSFGIVMWELLTGEEPYADMHC---                       | ASIIGGIVNNTLRPKIPQWCD   |
| consensus       | 1141 | kpy rk DvySfgivlWElvtg lpw l p mq av k lrp ipk                |                         |



```

BnaCTR1      760 PQVAAI IETCWTNE PWKRPSFATIIMDLIRPLIKSAVPPPRLDM-----
AtCTR1      778 PQVAAI IEGCWTNE PWKRPSFATIIMDLIRPLIKSAVPPNRSDL-----
OsMAPKKK6-DSM1 1063 PAIAEI IAKCWQTDPKLRPSFADIMASLKPLLKNMTAQAPRQRVQQTDE-----
AtEDR1      894 PVVGR IILECWQTDPNLRPSFAQLTEVLKPLNRLVLPQP-----
OsMAPKKK1-EDR1 960 PLVARI IWECWQKDPNLRPSFAQLTSALKTVQRLVTPSHQESQSPPVPQEIWVNSSTP--
BnaRaf33    328 SALAA VMKRCWDANPDKRPEMDEVVPMLESI DTTKGG-GMIPADQQQGCLCFRRETWSLS
BnaRaf39    322 TSLSN IMKRCWDANPVKRPEMEEVVKMLEGVDTSKGG-GMIPEDQRPGCFVSVGRGP--
BnaRaf36    415 GAMKAL IEQCWSVAPDKRPEFWQIVKVLQFRVSLEREGSLNLTSNKICRDPKSLKHWI
BnaRaf22    355 PALTE IMTRCWDGNAQVRPSFVEVVMLEAAETEIMT--TARKARFRCCMSQPMTID---
BnaRaf28    355 PVLGE IMTRCWDANPEVRPCFAEVVNLLEAAETEIMT--TARKARFRCCMTQPMTID---
BnaRaf34    257 EDLGV IVTSCWNEDPNARPNFTQIIQLLLNYLSKVGSPALSAIPQR-ILASKNSLLPPDS
BnaRaf41    259 GELGL IVTSCWKEDPNERPNFTEIIQMLLRYLSTVSPQIVPPPVRVFSSENVVFPSPDS
BnaRaf37    301 AGVGC LLEACWAADPKARPEFKEITASLEKLLRSLCSE--EDASSANVATEDSTTYLVQE
BnaRaf21    537 PRVKGL LERCWQOEPKERPDFEEIIEMLQQIMTEVNVVP-----
BnaRaf29    514 PKLTE LLEKCWQDPAQRPDFAEIKEMVTQLLHEVGDEEHQKDKRS----GYFSGLRKG
BnaRaf30    505 PKMREL MERLWEKDP SLRPDFAEIKEQLEETAKEVGEEGEEKKKASRGGGG-IFAALRRS
OsMAPKKK43-ILA1 507 PKLALL LESCWQONAVNRPDFVQIILQKLEIAGEHGIDLTHPHKEKEKGGFFTFGKVH--
BnaRaf17    393 PDLREL IVKCDADMNQRPSFLDIILKRLEKIKETLPSDHHWGLFTS-----
BnaRaf23    430 EEMREL IEECWDVKAVVRPTFSEIIVRLDRIFVQCSKQGWWKDTFKFPWK-----
BnaRaf46    428 PELKE LIEECWHPDISVGP TFSEIICRLEIIVLNCSKQGWWKDTFKFPWK-----
BnaRaf27    386 HGLKT LIEECWQDKPAKRPTFREI IKRLESILHHM GHKRQWRMRPLTCFQNF EHKKKHNW
BnaRaf35    1025 PEWKGL MESCWASEPTERPSFADISQKLRNMAAAMNLK-----
consensus  1201 p l lie cW dp rPsf eim lle l m

```

```

BnaCTR1      -----
AtCTR1      -----
OsMAPKKK6-DSM1 -----
AtEDR1      -----
OsMAPKKK1-EDR1 -----
BnaRaf33    387 AMLSKIIQNSRFVSCLLSSFLLLLIRKEKGLLGLFMVYDMFSIFFLNFPCFCSVW
BnaRaf39    -----
BnaRaf36    475 KKLGPQGGGTGGGGVGGSSSSGGLGRSAMPNPKFA-----
BnaRaf22    -----
BnaRaf28    -----
BnaRaf34    316 PGTSSLMATKLDECG----ETPKAKTEDKRKGLFFCFNQC-----
BnaRaf41    319 PGTCSLMNVDRKDGSGQKVNAADSSEKETKGSFFFCCS-----
BnaRaf37    359 RVVYDFPKPKIKTSKRKKRNKVMNMMAPFLKIFRDCISK-----
BnaRaf21    -----
BnaRaf29    569 HH-----
BnaRaf30    564 ATHH-----
OsMAPKKK43-ILA1 -----
BnaRaf17    -----
BnaRaf23    -----
BnaRaf46    -----
BnaRaf27    446 DMSSHDGSSSGSHL-----
BnaRaf35    -----
consensus  1261

```

## B

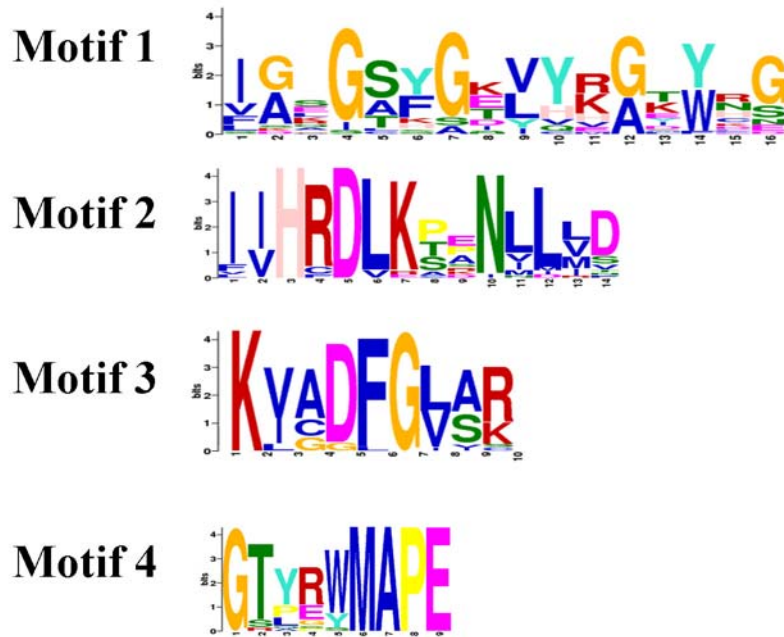

**Figure S4. Multiple alignment of Raf-subfamily MAPKKK proteins in representative species and schematic diagram of four motifs of BnaRafs.** (A) Multiple alignment of Raf-subfamily MAPKKK proteins in representative species. Multiple sequence alignment was performed using the ClustalX1.83 and illustrated by BOXSHADE ([http://www.ch.embnet.org/software/BOX\\_form.html](http://www.ch.embnet.org/software/BOX_form.html)). Identical amino acids are shaded in black, and similar amino acids are shaded in gray. Four motifs were shown as overbars, which are motif 1 of Serine/Threonine protein kinases active-site signature, motif 2 of Protein kinases ATP-binding region signature, motif 3 of tyrosine kinase phosphorylation site and motif 4 of G(T/S)PX(F/Y/W)MAPEV. (B) Schematic diagram of four motifs of BnaRafs. Motif analysis was determined by using MEME4.0 program as described in Materials and Methods section.

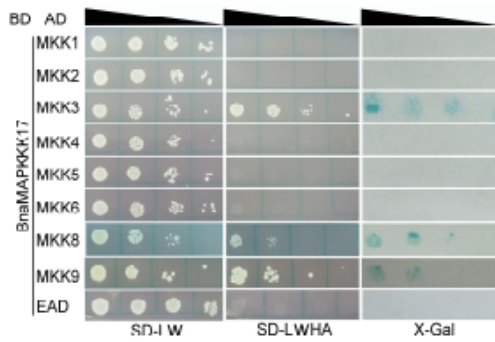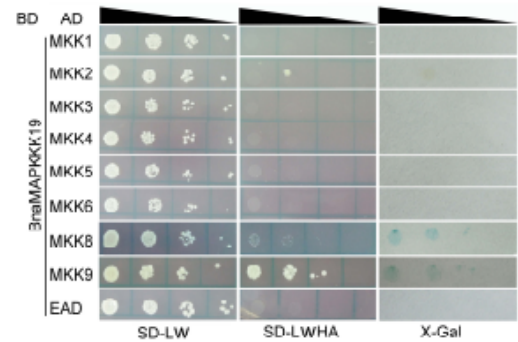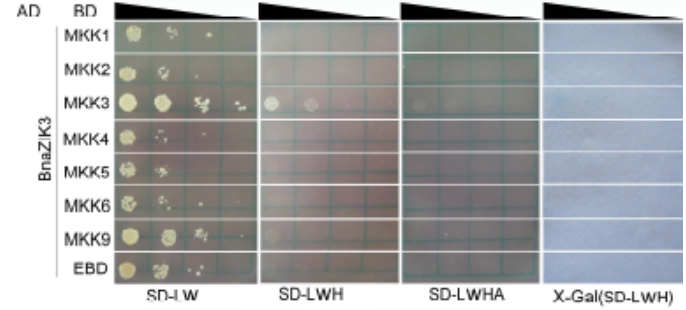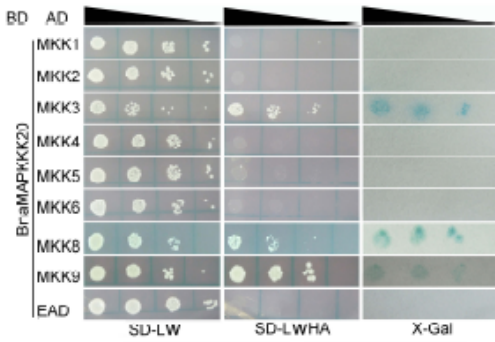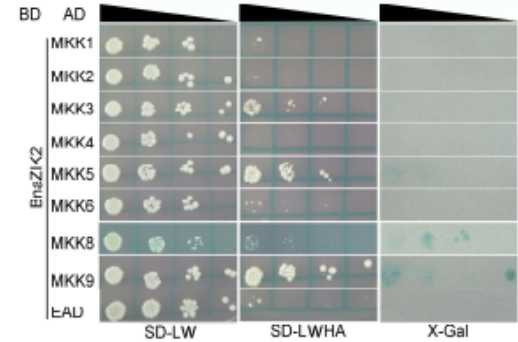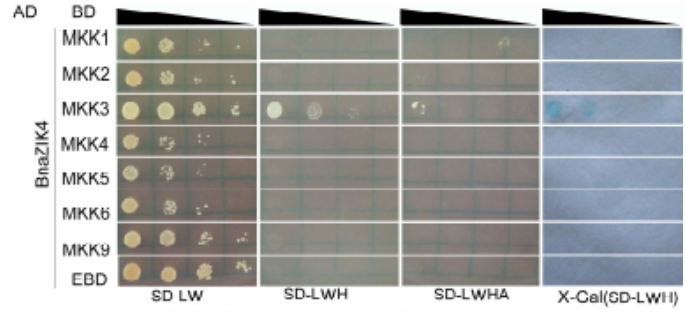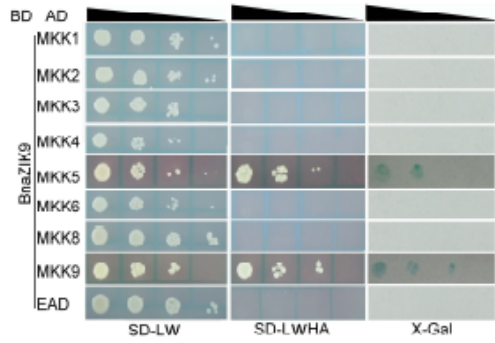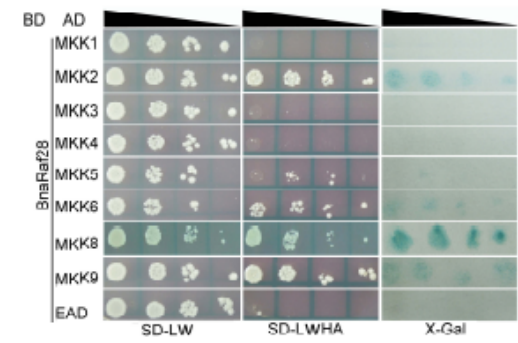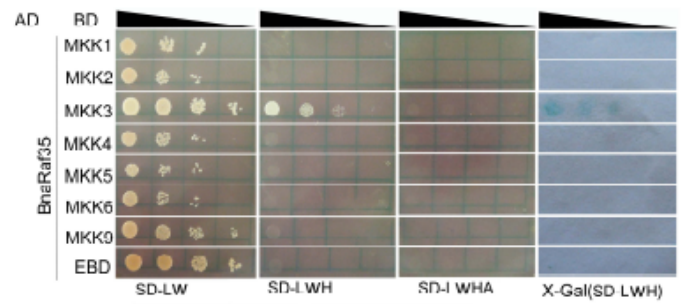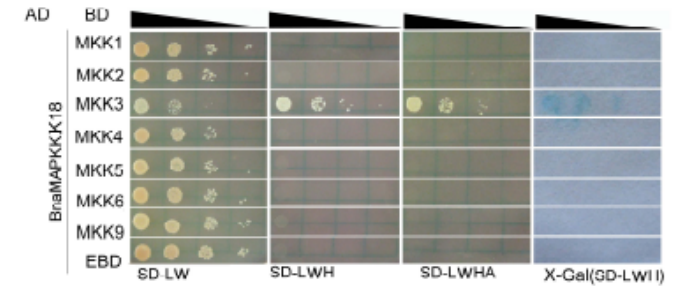

**Figure S5. Yeast two-hybrid (Y2H) assay of interactions between MAPKKK and MKK proteins in canola.** The yeast strain AH109 harboring the indicated plasmid combinations was grown on either the nonselective (SD-LW) or selective (SD-LWHA) media, followed by X-Gal staining. The remaining 18 BnaMAPKKKs did not interact with any of the eight BnaMKKs assayed and therefore are not shown here. Decreasing cell densities in the dilution series are illustrated by narrowing triangles. EAD and EBD are empty pGADT7 and pGBKT7 vector, respectively.

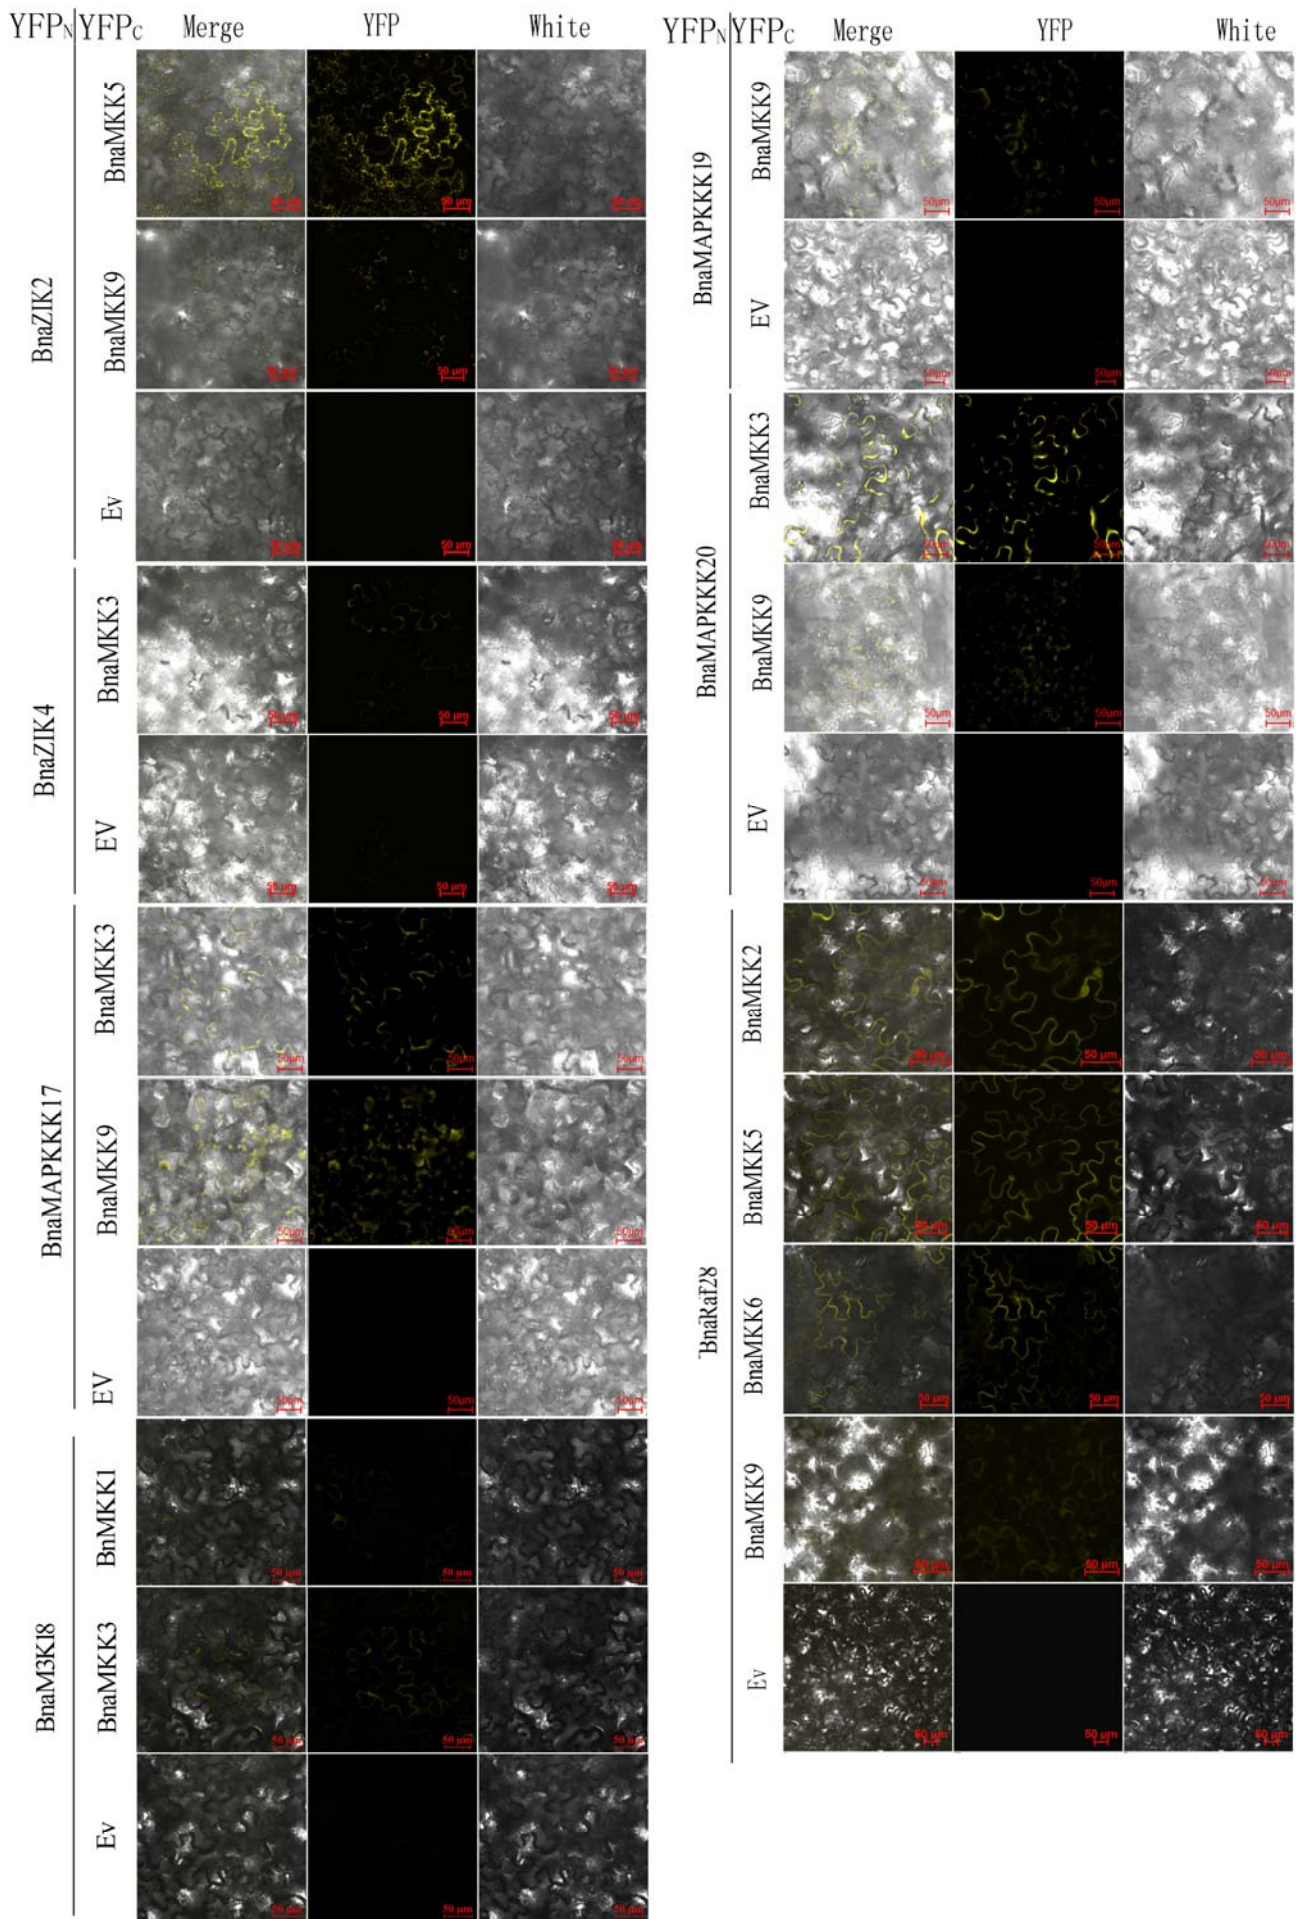

**Figure S6. Analysis of BnaMAPKKK and BnaMKK interactions in *N. benthamiana* leaf epidermal cells through bimolecular fluorescence complementation (BiFC).** BnaMAPKKK17, 19, 20, ZIK2, Raf28 was fused to N- terminal while BnaMKK2, -3, -5, -6 and -9 were fused to C-terminal halves of YFP, individually. The fluorescence of YFP in leaf discs was observed 3-4 d after agroinfiltration by confocal laser microscopy. Bar = 50  $\mu$ m.

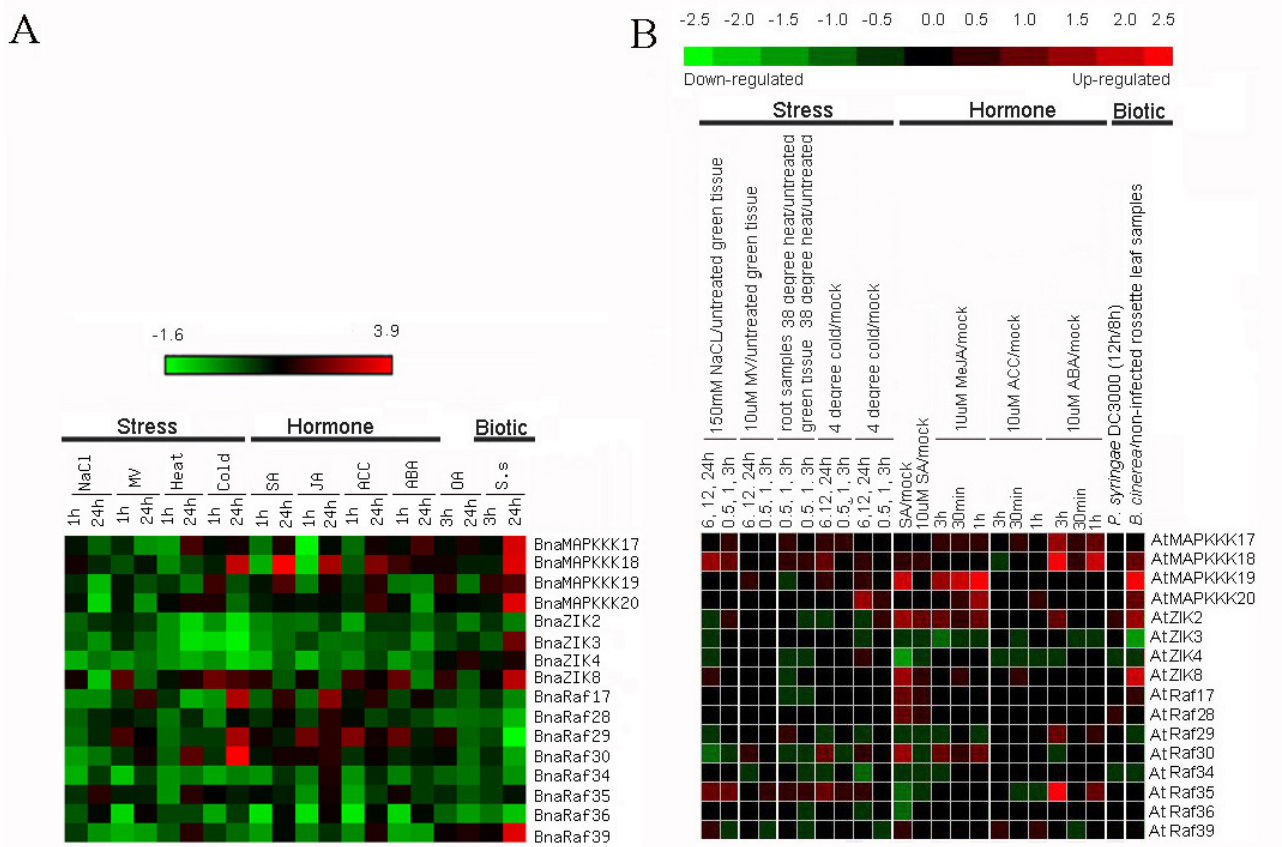

**Figure S7. The heat maps of the expression profiles of MAPKKK genes of canola and Arabidopsis in response to abiotic and biotic stresses.** (A) The expression ratios (treatment/mock,  $\log_2$  scale) of 16 *BnaMAPKKK* genes in response to abiotic and biotic stress derived from our quantitative RT-PCR were transformed into heat map using Matrix2png (<http://www.chibi.ubc.ca/matrix2png/bin/matrix2png.cgi>). (B) The expression ratios (treatment/mock,  $\log_2$  scale) of 16 *AtMAPKKK* are derived from Genevestigator (<https://www.genevestigator.com/gv/plant.jsp>), which contains Arabidopsis ATH1 GeneChip analysis data. The up-regulated expression was indicated in the red rectangle while the down-regulated expression in the green rectangle shape.

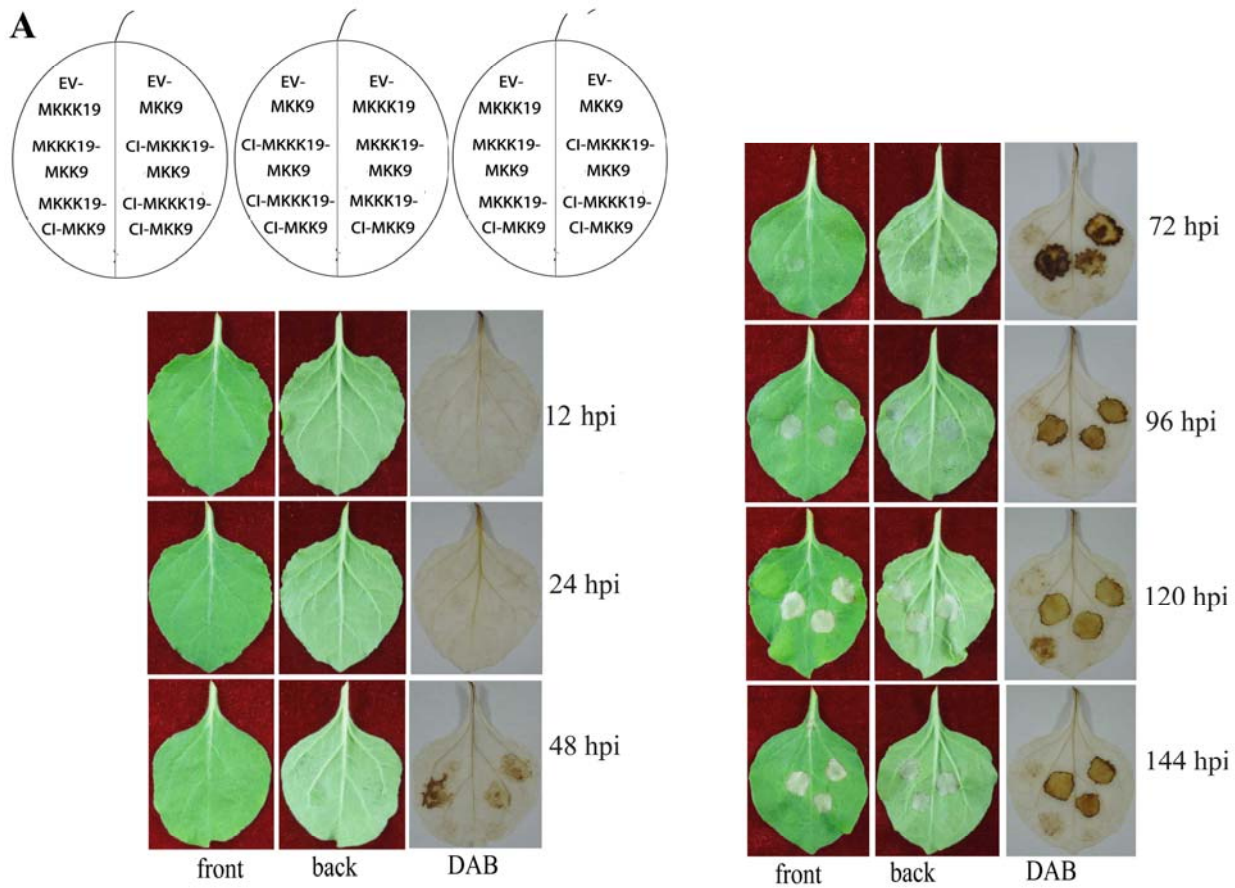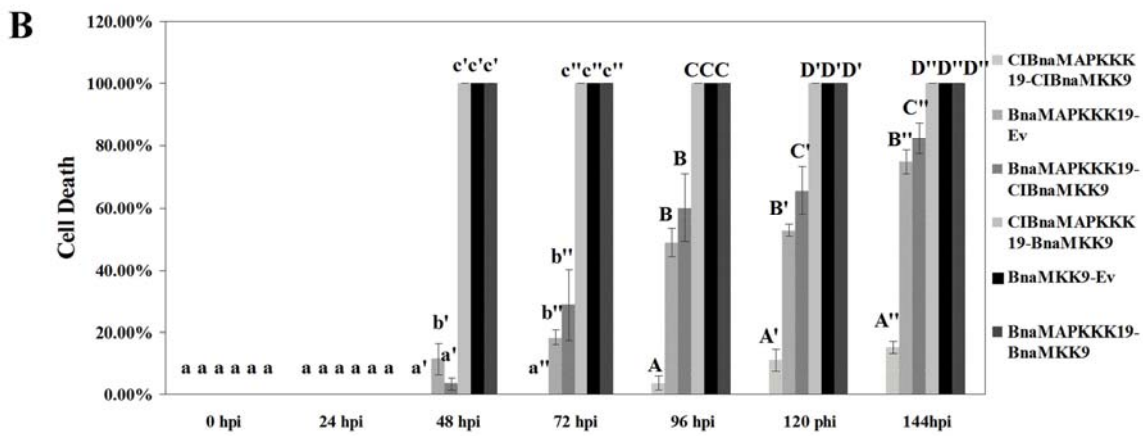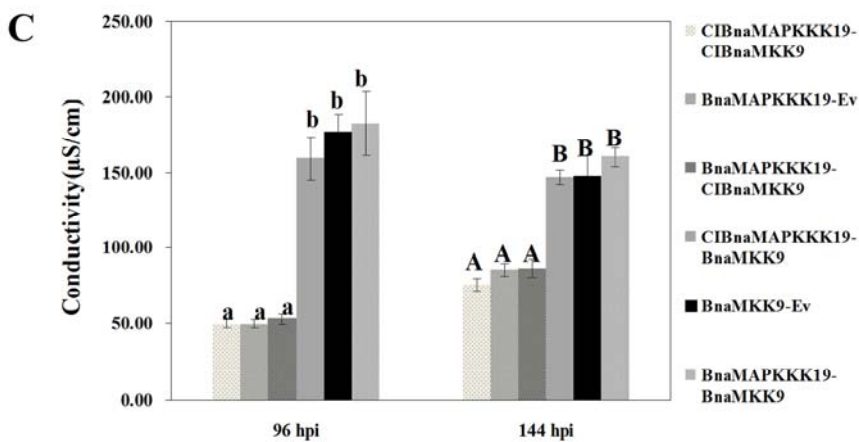

**Figure S8. Co-expression analysis of *BnaMAPKKK19* and *MKK9* in eliciting pathogen-independent cell death in *N. benthamiana* leaves.**



Leaves were infiltrated with agrobacteria carrying wild-type genes or mutated versions or both. All experiments were performed three times with similar results obtained. (A) Symptoms of *N. benthamiana* leaf areas expressing *BnaMAPKKK19*, *BnaMKK9* or their constitutively inactive (CI) mutant forms 12, 24, 48, 72, 96, 120 and 144 hours post-infiltration (hpi). EV represents the pYBHA binary vector harboring GFP gene under double CaMV35S promoter. The left, middle and right panels represent the front, back sides and DAB staining, respectively. The scheme at the top left shows the injection arrangement of leaves, in which three combinations at each half of a leaf. Equal amount of agrobacterial resuspension (1:1:1, volume ratio) in AS medium was injected into each site. (B) Quantification of cell death in *N. benthamiana* leaves expressing *BnaMAPKKK19*, *BnaMKK9* or their CI forms by examining the percentages of leaf sites with water-soaked symptom at various time-points. (C) Measurement of electrolyte leakage in leaf discs expressing *BnaMAPKKK19*, *BnaMKK9* or their CI forms at 96 and 144 hpi. Values represent the means of three independent assays for each time-point  $\pm$  S.E. Identical and different letters represent non- and significant difference ( $p \leq 0.05$ ).
